# Supplementary material for: Pan-cancer analysis and the oncogenic role of Glypican 1 in hepatocellular carcinoma
Source: Sci Rep. 2024 Jul 9;14:15870. doi: 10.1038/s41598-024-66838-9 (PMC11233571; doi:10.1038/s41598-024-66838-9)
Supplement: Supplementary file 2 — Supplementary Information 2. [file 41598_2024_66838_MOESM2_ESM.xlsx]

## Sheet: Supplementary Table 4
ALL DATE		gene	cor	p.value		P<0.001	gene	cor	p.value
1	GPC1	TSPAN6	-0.233517	5.01521e-06		1	TSPAN6	-0.233517	5.01521e-06
2	GPC1	TNMD	0.0159001	0.759237		2	FGR	0.187097	0.000274385
3	GPC1	DPM1	-0.0136243	0.79285		3	STPG1	0.249601	1.01612e-06
4	GPC1	SCYL3	0.0574882	0.267445		4	NIPAL3	0.218283	2.05592e-05
5	GPC1	C1orf112	-0.0862516	0.0958036		5	CFTR	0.189886	0.00022111
6	GPC1	FGR	0.187097	0.000274385		6	ANKIB1	0.173823	0.000735333
7	GPC1	CFH	-0.0543147	0.294798		7	BAD	0.330768	5.34781e-11
8	GPC1	FUCA2	0.0256808	0.620556		8	HS3ST1	0.191237	0.000198932
9	GPC1	GCLC	-0.100767	0.0515128		9	DBNDD1	0.236359	3.81316e-06
10	GPC1	NFYA	0.0239245	0.644659		10	CFLAR	0.267939	1.43392e-07
11	GPC1	STPG1	0.249601	1.01612e-06		11	MTMR7	-0.19171	0.000191682
12	GPC1	NIPAL3	0.218283	2.05592e-05		12	PLXND1	0.263118	2.43455e-07
13	GPC1	LAS1L	0.0776908	0.13369		13	AK2	0.175089	0.000671313
14	GPC1	ENPP4	0.158584	0.00209735		14	CAMKK1	0.348707	3.91751e-12
15	GPC1	SEMA3F	-0.00947621	0.855071		15	RECQL	0.169885	0.000972296
16	GPC1	CFTR	0.189886	0.00022111		16	HSPB6	0.196189	0.000134222
17	GPC1	ANKIB1	0.173823	0.000735333		17	ARHGAP33	0.246092	1.45333e-06
18	GPC1	CYP51A1	-0.0492858	0.341844		18	SLC25A13	-0.299137	3.60557e-09
19	GPC1	KRIT1	0.110753	0.0322505		19	PRSS22	0.239451	2.81926e-06
20	GPC1	RAD52	0.111437	0.0311942		20	MCUB	0.33347	3.64612e-11
21	GPC1	BAD	0.330768	5.34781e-11		21	MEOX1	0.307237	1.28539e-09
22	GPC1	LAP3	-0.0553469	0.285703		22	ACSM3	-0.175555	0.000649101
23	GPC1	CD99	0.083393	0.107365		23	FAM214B	0.232674	5.43677e-06
24	GPC1	HS3ST1	0.191237	0.000198932		24	PRKAR2B	0.20582	6.07029e-05
25	GPC1	AOC1	0.0426806	0.410499		25	MSL3	0.268855	1.29519e-07
26	GPC1	WNT16	-0.00665054	0.898002		26	CREBBP	0.184541	0.000333509
27	GPC1	HECW1	0.130406	0.0115937		27	WDR54	0.223834	1.24353e-05
28	GPC1	MAD1L1	0.13435	0.00928659		28	ITGA3	0.409665	1.43964e-16
29	GPC1	LASP1	0.147408	0.00427904		29	LAMP2	0.244909	1.63761e-06
30	GPC1	SNX11	0.0848008	0.101541		30	ASB4	-0.261533	2.89072e-07
31	GPC1	TMEM176A	-0.167388	0.00115713		31	OSBPL7	0.219107	1.90958e-05
32	GPC1	M6PR	0.131346	0.0110023		32	MAP3K14	0.290252	1.07804e-08
33	GPC1	KLHL13	-0.10993	0.0335634		33	TMEM132A	0.269684	1.1809e-07
34	GPC1	CYP26B1	0.139012	0.00709308		34	ZNF263	0.198151	0.000114528
35	GPC1	ICA1	-0.033347	0.520275		35	SPATA20	0.297576	4.38237e-09
36	GPC1	DBNDD1	0.236359	3.81316e-06		36	CACNA1G	0.296763	4.84896e-09
37	GPC1	ALS2	0.155369	0.00258728		37	TNFRSF12A	0.242208	2.14624e-06
38	GPC1	CASP10	0.0998216	0.0537537		38	MAP3K9	0.220693	1.65534e-05
39	GPC1	CFLAR	0.267939	1.43392e-07		39	BAIAP2L1	0.204525	6.76865e-05
40	GPC1	TFPI	-0.0547814	0.290663		40	ALDH3B1	0.306758	1.36751e-09
41	GPC1	NDUFAF7	-0.0213792	0.680253		41	TTC22	0.237501	3.41255e-06
42	GPC1	RBM5	0.0444753	0.391082		42	PHTF2	0.211625	3.69525e-05
43	GPC1	MTMR7	-0.19171	0.000191682		43	CCL26	0.308253	1.12687e-09
44	GPC1	SLC7A2	-0.0515834	0.319786		44	FARP2	0.235317	4.21804e-06
45	GPC1	ARF5	0.151543	0.00330468		45	TBXA2R	0.310688	8.20408e-10
46	GPC1	SARM1	0.164078	0.00145204		46	VPS41	0.171906	0.000843025
47	GPC1	POLDIP2	-0.0618599	0.232692		47	SCIN	0.277287	4.98648e-08
48	GPC1	PLXND1	0.263118	2.43455e-07		48	PROM1	0.178125	0.000538244
49	GPC1	AK2	0.175089	0.000671313		49	PAFAH1B1	0.276899	5.21401e-08
50	GPC1	CD38	-0.0435879	0.400612		50	KIAA0100	0.208493	4.83808e-05
51	GPC1	FKBP4	0.0423016	0.414671		51	GAS7	0.34721	4.90396e-12
52	GPC1	KDM1A	0.0221656	0.669176		52	MATK	0.26071	3.1589e-07
53	GPC1	RBM6	0.0820331	0.113238		53	RPUSD1	0.17981	0.000475405
54	GPC1	CAMKK1	0.348707	3.91751e-12		54	RHBDF1	0.32468	1.25033e-10
55	GPC1	RECQL	0.169885	0.000972296		55	LUC7L	0.209487	4.44361e-05
56	GPC1	VPS50	0.113852	0.0276952		56	PIGQ	0.274925	6.53618e-08
57	GPC1	HSPB6	0.196189	0.000134222		57	CRAMP1	0.202081	8.2969e-05
58	GPC1	ARHGAP33	0.246092	1.45333e-06		58	MYLIP	0.239324	2.85463e-06
59	GPC1	NDUFAB1	0.0474952	0.35969		59	E2F2	0.197288	0.000122825
60	GPC1	PDK4	-0.07	0.17674		60	SYN1	0.236666	3.70115e-06
61	GPC1	SLC22A16	-0.147078	0.00436712		61	CDK11A	0.177257	0.000573538
62	GPC1	ZMYND10	0.161667	0.00170867		62	TFAP2B	0.20567	6.14739e-05
63	GPC1	ABCB5	0.0536933	0.300365		63	CYTH3	0.407056	2.33072e-16
64	GPC1	ARX	0.161747	0.00169954		64	SYPL1	0.227187	9.1208e-06
65	GPC1	SLC25A13	-0.299137	3.60557e-09		65	CYB561	0.326549	9.65189e-11
66	GPC1	ST7	-0.0725591	0.161401		66	ST3GAL1	-0.16955	0.000995384
67	GPC1	CDC27	0.0757638	0.143632		67	MMP25	0.194145	0.000158083
68	GPC1	SLC4A1	-0.0166762	0.747874		68	IL32	0.243236	1.93698e-06
69	GPC1	CALCR	0.0405602	0.43416		69	PKD1	0.374335	6.93569e-14
70	GPC1	HCCS	0.141217	0.00622674		70	MAPK8IP2	0.188956	0.000237689
71	GPC1	DVL2	0.0226381	0.662553		71	RHOBTB2	0.178044	0.000541471
72	GPC1	PRSS22	0.239451	2.81926e-06		72	PAX7	0.247748	1.22827e-06
73	GPC1	UPF1	0.0665049	0.199401		73	MASP2	-0.20592	6.01946e-05
74	GPC1	SKAP2	0.147919	0.00414613		74	FAM76A	0.220911	1.62308e-05
75	GPC1	SLC25A5	0.0986463	0.0566509		75	POMT2	0.286671	1.65855e-08
76	GPC1	MCUB	0.33347	3.64612e-11		76	MLXIPL	-0.294827	6.16251e-09
77	GPC1	HOXA11	0.0545867	0.292384		77	STARD3NL	0.194252	0.000156741
78	GPC1	POLR2J	-0.0360969	0.486447		78	CD9	0.313242	5.86183e-10
79	GPC1	DHX33	0.0149241	0.773601		79	PHF7	-0.19375	0.000163128
80	GPC1	MEOX1	0.307237	1.28539e-09		80	STAB1	0.345234	6.58354e-12
81	GPC1	THSD7A	0.13205	0.0105766		81	IDS	0.343453	8.57082e-12
82	GPC1	LIG3	0.0385679	0.45709		82	SCMH1	0.191535	0.000194339
83	GPC1	RPAP3	0.156244	0.00244443		83	MRC2	0.44072	3.32946e-19
84	GPC1	ACSM3	-0.175555	0.000649101		84	BTBD7	0.177744	0.000553479
85	GPC1	REXO5	-0.0241225	0.641922		85	ABHD5	0.170038	0.000961884
86	GPC1	CIAPIN1	0.0999317	0.0534887		86	ANOS1	0.335262	2.82235e-11
87	GPC1	SPPL2B	0.115665	0.0252941		87	DPF1	0.182926	0.000376803
88	GPC1	FAM214B	0.232674	5.43677e-06		88	PLAUR	0.320315	2.27203e-10
89	GPC1	COPZ2	0.165295	0.00133636		89	WIZ	0.172953	0.000782522
90	GPC1	PRKAR2B	0.20582	6.07029e-05		90	DCN	0.354058	1.73799e-12
91	GPC1	MSL3	0.268855	1.29519e-07		91	QPCTL	-0.179767	0.000476927
92	GPC1	CREBBP	0.184541	0.000333509		92	PPP5C	0.188165	0.000252702
93	GPC1	TSPOAP1	0.133833	0.00956382		93	CEP68	0.17064	0.000921972
94	GPC1	MPO	-0.0346826	0.503696		94	MAP4K3	0.23554	4.12793e-06
95	GPC1	PON1	-0.0709121	0.171153		95	TYROBP	0.18395	0.000348792
96	GPC1	GCFC2	-0.145815	0.0047192		96	TMEM159	0.396815	1.48381e-15
97	GPC1	WDR54	0.223834	1.24353e-05		97	PRICKLE3	0.19979	0.000100197
98	GPC1	CROT	-0.109196	0.0347733		98	NR1H4	-0.215547	2.62184e-05
99	GPC1	ABCB4	-0.148645	0.00396343		99	ALOX5	0.341739	1.10314e-11
100	GPC1	KMT2E	0.13267	0.0102145		100	UBR7	0.219257	1.88411e-05
101	GPC1	RHBDD2	0.144293	0.00517703		101	MAP4K5	0.196469	0.00013123
102	GPC1	SOX8	0.159359	0.00199276		102	EHD3	0.274048	7.22293e-08
103	GPC1	IBTK	0.0357752	0.490343		103	CLDN11	0.227259	9.05972e-06
104	GPC1	ZNF195	0.147517	0.00425052		104	SLC25A39	0.198372	0.000112495
105	GPC1	MYCBP2	0.0927685	0.0731462		105	MVP	0.420906	1.71977e-17
106	GPC1	FBXL3	0.0790287	0.127106		106	DNASE1L1	0.252843	7.26618e-07
107	GPC1	ITGAL	-0.0378031	0.466069		107	HEBP1	0.201254	8.8837e-05
108	GPC1	PDK2	-0.046587	0.368961		108	MAMLD1	0.266004	1.77559e-07
109	GPC1	ITGA3	0.409665	1.43964e-16		109	CAPN1	0.293125	7.59676e-09
110	GPC1	ZFX	0.101237	0.0504285		110	MDH1	0.180199	0.000461903
111	GPC1	LAMP2	0.244909	1.63761e-06		111	ZMYND11	0.183256	0.000367539
112	GPC1	ITGA2B	0.143969	0.00527954		112	GLT8D1	-0.251336	8.4966e-07
113	GPC1	ASB4	-0.261533	2.89072e-07		113	ATP2C1	0.239419	2.82816e-06
114	GPC1	GDE1	0.085172	0.100047		114	RUFY3	0.195853	0.000137894
115	GPC1	REX1BD	0.0420095	0.417904		115	WWTR1	0.285488	1.90975e-08
116	GPC1	CRLF1	0.14548	0.00481666		116	PHLDB1	0.384522	1.25974e-14
117	GPC1	OSBPL7	0.219107	1.90958e-05		117	PRDM11	0.325521	1.11303e-10
118	GPC1	TMEM98	0.0331601	0.522618		118	SYT13	0.317158	3.47938e-10
119	GPC1	YBX2	0.0858664	0.0973008		119	SNAI2	0.190404	0.000212347
120	GPC1	KRT33A	-0.0801038	0.122		120	HGF	0.214174	2.95862e-05
121	GPC1	MAP3K14	0.290252	1.07804e-08		121	NCDN	0.365182	3.0537e-13
122	GPC1	ABCC8	0.0436384	0.400067		122	ADGRA2	0.34531	6.50979e-12
123	GPC1	CACNG3	0.0439358	0.396859		123	SLC7A9	-0.246866	1.3436e-06
124	GPC1	TMEM132A	0.269684	1.1809e-07		124	OSBPL5	0.466621	1.2799e-21
125	GPC1	AP2B1	0.130545	0.0115043		125	CPS1	-0.192961	0.000173657
126	GPC1	TAC1	-0.0447334	0.388336		126	FHL1	0.246299	1.42313e-06
127	GPC1	ZNF263	0.198151	0.000114528		127	SLC45A4	0.221347	1.56014e-05
128	GPC1	CX3CL1	0.0553737	0.285471		128	GRAMD1B	0.31583	4.15586e-10
129	GPC1	SPATA20	0.297576	4.38237e-09		129	ALAS1	-0.260905	3.09319e-07
130	GPC1	CACNA1G	0.296763	4.84896e-09		130	BIRC3	0.243046	1.97417e-06
131	GPC1	TNFRSF12A	0.242208	2.14624e-06		131	SNAPC1	0.235792	4.02858e-06
132	GPC1	DLX6	-0.00266878	0.958976		132	ABCC2	-0.251945	7.97732e-07
133	GPC1	MAP3K9	0.220693	1.65534e-05		133	GCLM	0.179804	0.000475623
134	GPC1	RALA	0.106848	0.0388898		134	EHD2	0.418398	2.78207e-17
135	GPC1	BAIAP2L1	0.204525	6.76865e-05		135	NR1H3	-0.212167	3.52546e-05
136	GPC1	KDM7A	0.101442	0.0499629		136	TYMP	0.306335	1.44424e-09
137	GPC1	ETV1	0.0401604	0.438707		137	KPNA6	0.221997	1.47075e-05
138	GPC1	AGK	0.0811902	0.117003		138	VIM	0.244913	1.63695e-06
139	GPC1	ALDH3B1	0.306758	1.36751e-09		139	CD44	0.200639	9.34525e-05
140	GPC1	TTC22	0.237501	3.41255e-06		140	KCNG1	0.317449	3.34581e-10
141	GPC1	PHTF2	0.211625	3.69525e-05		141	INSRR	0.299592	3.40537e-09
142	GPC1	CCL26	0.308253	1.12687e-09		142	VRK2	0.209656	4.37945e-05
143	GPC1	FARP2	0.235317	4.21804e-06		143	TNFRSF1B	0.213204	3.2209e-05
144	GPC1	USH1C	0.0943764	0.0682862		144	VEZT	0.275265	6.28731e-08
145	GPC1	GGCT	0.0980001	0.0582984		145	ARNTL2	0.374919	6.29914e-14
146	GPC1	DBF4	0.0816819	0.114795		146	ANK1	0.244707	1.67125e-06
147	GPC1	TBXA2R	0.310688	8.20408e-10		147	IBSP	0.200602	9.37401e-05
148	GPC1	IFRD1	0.165084	0.00135584		148	HMGB3	0.313905	5.36887e-10
149	GPC1	LGALS14	-0.0481271	0.353326		149	BAK1	0.296962	4.7309e-09
150	GPC1	COX10	0.10725	0.0381584		150	IKZF2	0.202959	7.71356e-05
151	GPC1	GTF2IRD1	0.159997	0.00191014		151	GRN	0.232305	5.63115e-06
152	GPC1	PAF1	-0.0175096	0.735731		152	ARHGAP31	0.281451	3.07496e-08
153	GPC1	VPS41	0.171906	0.000843025		153	EIPR1	0.192543	0.000179495
154	GPC1	ARHGAP44	0.132	0.0106067		154	ALG1	0.176695	0.000597545
155	GPC1	ELAC2	0.0460233	0.374788		155	CHPF2	0.216731	2.3608e-05
156	GPC1	SCIN	0.277287	4.98648e-08		156	FUT8	0.250128	9.62592e-07
157	GPC1	ARSD	-0.0254861	0.623208		157	UBA6	0.177683	0.000555965
158	GPC1	PNPLA4	0.077377	0.135272		158	SLC4A7	0.203199	7.56108e-05
159	GPC1	MYH13	0.0956499	0.0646273		159	APBA2	0.174245	0.000713378
160	GPC1	ADIPOR2	-0.0521391	0.314593		160	TMSB10	0.28799	1.41623e-08
161	GPC1	CDKL3	0.117509	0.0230391		161	RNF19A	0.288405	1.34734e-08
162	GPC1	UPP2	0.0536001	0.301206		162	SH3YL1	0.221303	1.56643e-05
163	GPC1	PRSS21	0.144113	0.00523397		163	VCL	0.358573	8.65082e-13
164	GPC1	MARK4	0.0420637	0.417303		164	NSMAF	0.17066	0.000920697
165	GPC1	PROM1	0.178125	0.000538244		165	TIMP2	0.392397	3.23376e-15
166	GPC1	CCDC124	0.169042	0.00103141		166	CUL3	0.193828	0.000162117
167	GPC1	CEACAM21	0.113003	0.0288848		167	MYOM2	0.205257	6.3651e-05
168	GPC1	PAFAH1B1	0.276899	5.21401e-08		168	OTC	-0.197437	0.000121358
169	GPC1	NOS2	0.0232364	0.654206		169	USP2	0.192498	0.000180139
170	GPC1	DNAH9	0.0977724	0.0588883		170	TUBG2	0.202633	7.92576e-05
171	GPC1	KIAA0100	0.208493	4.83808e-05		171	FLT4	0.213152	3.23546e-05
172	GPC1	SLC13A2	0.0195255	0.706636		172	FBXO42	0.202637	7.92274e-05
173	GPC1	GAS7	0.34721	4.90396e-12		173	HOXC8	0.190388	0.000212616
174	GPC1	TRAPPC6A	-0.136894	0.00802445		174	TLL1	0.245665	1.51744e-06
175	GPC1	MATK	0.26071	3.1589e-07		175	TRIO	0.29511	5.95121e-09
176	GPC1	CEACAM7	0.135972	0.00846311		176	VCAN	0.320125	2.3314e-10
177	GPC1	CD79B	-0.019628	0.705169		177	CLEC16A	0.347842	4.46096e-12
178	GPC1	SCN4A	-0.0183908	0.722964		178	MSR1	0.280511	3.43191e-08
179	GPC1	ST7L	0.109569	0.0341534		179	CDH1	0.184664	0.000330435
180	GPC1	TKTL1	0.0830875	0.108663		180	DNAH5	0.176998	0.000584482
181	GPC1	PAX6	0.141685	0.00605568		181	RIPOR1	0.321506	1.93213e-10
182	GPC1	RPUSD1	0.17981	0.000475405		182	PHLPP2	0.175767	0.000639206
183	GPC1	RHBDF1	0.32468	1.25033e-10		183	RTN4R	0.354788	1.55384e-12
184	GPC1	LUC7L	0.209487	4.44361e-05		184	INPP4A	0.334155	3.30695e-11
185	GPC1	CACNA2D2	0.0335218	0.51809		185	RAB27B	0.238129	3.20928e-06
186	GPC1	BAIAP3	0.128356	0.0129819		186	LSG1	0.224888	1.12857e-05
187	GPC1	TSR3	0.147618	0.00422392		187	PARP3	0.246331	1.41864e-06
188	GPC1	PIGQ	0.274925	6.53618e-08		188	TNC	0.333952	3.40426e-11
189	GPC1	CRAMP1	0.202081	8.2969e-05		189	RIPOR3	0.224077	1.21604e-05
190	GPC1	TEAD3	0.0435016	0.401546		190	CAPG	0.245069	1.61157e-06
191	GPC1	SELE	-0.0407683	0.431803		191	ADAM28	0.286409	1.71133e-08
192	GPC1	DNAJC11	0.144618	0.00507618		192	LCP2	0.199605	0.000101729
193	GPC1	FMO3	-0.132357	0.0103959		193	EPHA3	0.343674	8.29582e-12
194	GPC1	MYLIP	0.239324	2.85463e-06		194	DSG2	0.300829	2.91455e-09
195	GPC1	NOX1	0.103716	0.0450191		195	GEMIN8	0.205539	6.21564e-05
196	GPC1	E2F2	0.197288	0.000122825		196	OFD1	0.178059	0.000540865
197	GPC1	PSMB1	-0.0723748	0.162471		197	GPM6B	0.170403	0.000937529
198	GPC1	SYN1	0.236666	3.70115e-06		198	ATP6V1H	0.21245	3.43971e-05
199	GPC1	JARID2	-0.0431393	0.405483		199	ARAP2	0.241318	2.34461e-06
200	GPC1	CDKL5	0.0699802	0.176863		200	KIAA0556	0.242224	2.14267e-06
201	GPC1	CAMK1G	0.0729533	0.15913		201	SCML1	-0.182402	0.000391931
202	GPC1	CDK11A	0.177257	0.000573538		202	WWC3	0.248301	1.1609e-06
203	GPC1	NADK	0.0570098	0.271454		203	ARHGAP6	0.31553	4.32555e-10
204	GPC1	TFAP2B	0.20567	6.14739e-05		204	MAP4	0.257335	4.53073e-07
205	GPC1	TFAP2D	0.0165103	0.750297		205	HDAC9	0.274416	6.92659e-08
206	GPC1	DLEC1	-0.0225704	0.6635		206	TSPAN17	0.358578	8.64486e-13
207	GPC1	CYTH3	0.407056	2.33072e-16		207	CC2D2A	0.238094	3.22033e-06
208	GPC1	ADAM22	0.165171	0.00134781		208	SNX29	0.329983	5.97325e-11
209	GPC1	SYPL1	0.227187	9.1208e-06		209	VPS13D	0.28832	1.36114e-08
210	GPC1	CYB561	0.326549	9.65189e-11		210	CELF2	0.243389	1.90756e-06
211	GPC1	SPAG9	0.158298	0.00213715		211	COL9A2	0.207186	5.40769e-05
212	GPC1	CELSR3	-0.00746085	0.885655		212	EPN3	0.217592	2.18672e-05
213	GPC1	AASS	-0.109173	0.0348114		213	LTBP1	0.328268	7.59624e-11
214	GPC1	PLEKHG6	0.129275	0.0123421		214	RCN1	0.213764	3.06691e-05
215	GPC1	SS18L2	-0.116057	0.0248		215	ELN	0.276034	5.7584e-08
216	GPC1	MPND	-0.0542066	0.295762		216	RFC2	0.288821	1.28145e-08
217	GPC1	MGST1	-0.0512673	0.322764		217	JKAMP	0.17365	0.000744494
218	GPC1	CRY1	0.13865	0.00724483		218	ARHGEF5	0.25594	5.25183e-07
219	GPC1	PGLYRP1	0.0264198	0.610532		219	NFE2L3	0.278202	4.48675e-08
220	GPC1	NFIX	0.0837895	0.105699		220	LIMA1	0.216408	2.42947e-05
221	GPC1	ST3GAL1	-0.16955	0.000995384		221	SLC4A8	0.227001	9.28019e-06
222	GPC1	MMP25	0.194145	0.000158083		222	LAMC3	0.282199	2.81676e-08
223	GPC1	IL32	0.243236	1.93698e-06		223	PTGER3	0.21478	2.80518e-05
224	GPC1	PKD1	0.374335	6.93569e-14		224	MAPK9	0.170543	0.000928317
225	GPC1	MAPK8IP2	0.188956	0.000237689		225	COL23A1	0.258756	3.89497e-07
226	GPC1	MED24	0.0555796	0.28368		226	BCAR1	0.362795	4.46038e-13
227	GPC1	RHOBTB2	0.178044	0.000541471		227	HOMER3	0.359189	7.85911e-13
228	GPC1	HEATR5B	0.0589016	0.255841		228	PIK3CB	0.197332	0.000122391
229	GPC1	SEC62	0.031039	0.549572		229	PRSS8	0.374258	7.02339e-14
230	GPC1	RPS20	-0.0708527	0.171513		230	FNIP2	0.245544	1.53608e-06
231	GPC1	CSDE1	0.0208138	0.688261		231	MSMO1	-0.250025	9.72843e-07
232	GPC1	UBE3C	0.0831234	0.10851		232	ALX4	0.270312	1.10083e-07
233	GPC1	REV3L	0.11797	0.0225029		233	NRIP2	0.210883	3.94011e-05
234	GPC1	TENM1	-0.0099073	0.848556		234	AP5M1	0.21842	2.03084e-05
235	GPC1	PAX7	0.247748	1.22827e-06		235	KCNQ1	0.294782	6.19644e-09
236	GPC1	MASP2	-0.20592	6.01946e-05		236	TRAPPC3	0.199512	0.0001025
237	GPC1	IYD	-0.017749	0.732255		237	ENTPD2	0.208349	4.89807e-05
238	GPC1	FAM76A	0.220911	1.62308e-05		238	SDCCAG8	0.180484	0.000452256
239	GPC1	TRAF3IP3	0.0593878	0.251931		239	FOXC1	0.209296	4.51713e-05
240	GPC1	POMT2	0.286671	1.65855e-08		240	CBLN4	-0.218495	2.01724e-05
241	GPC1	VTA1	0.0356716	0.4916		241	CHRDL2	0.186616	0.000284718
242	GPC1	MLXIPL	-0.294827	6.16251e-09		242	RELT	0.325086	1.18215e-10
243	GPC1	BAZ1B	0.0973588	0.0599722		243	SZRD1	0.286772	1.63867e-08
244	GPC1	RANBP9	0.0451623	0.383799		244	KCNH2	0.204462	6.80447e-05
245	GPC1	ETV7	0.10995	0.033531		245	CYFIP2	0.175043	0.000673533
246	GPC1	SPRTN	0.0818174	0.114192		246	MCOLN3	0.173789	0.00073712
247	GPC1	EEF1AKNMT	0.0797166	0.12382		247	MRPL43	-0.182601	0.000386096
248	GPC1	DYRK4	0.109657	0.034009		248	ITIH1	-0.312756	6.25027e-10
249	GPC1	ZNF207	0.135052	0.00892196		249	PHF21B	0.20598	5.9891e-05
250	GPC1	UQCRC1	-0.0479346	0.355257		250	TRAF1	0.217192	2.26601e-05
251	GPC1	STARD3NL	0.194252	0.000156741		251	TRAF3IP2	0.204913	6.55156e-05
252	GPC1	CD9	0.313242	5.86183e-10		252	GYG2	-0.194784	0.000150216
253	GPC1	HHATL	0.109175	0.0348071		253	F7	-0.264065	2.19586e-07
254	GPC1	NCAPD2	0.109698	0.0339418		254	PRDM1	0.181713	0.000412659
255	GPC1	IFFO1	-0.0869471	0.0931461		255	TMCC3	0.322272	1.74035e-10
256	GPC1	GIPR	0.167438	0.00115313		256	ATP11B	0.240098	2.6452e-06
257	GPC1	PHF7	-0.19375	0.000163128		257	LAMC2	0.26721	1.55446e-07
258	GPC1	SEMA3G	0.0579947	0.263246		258	SEC61A1	0.247567	1.25117e-06
259	GPC1	NISCH	0.0455172	0.380069		259	PPP1R12A	0.19757	0.000120058
260	GPC1	STAB1	0.345234	6.58354e-12		260	RASGRF1	-0.170092	0.000958262
261	GPC1	FUZ	0.0949337	0.0666647		261	CAMK2B	0.169727	0.000983081
262	GPC1	SLC6A13	-0.124933	0.015628		262	CROCC	0.342336	1.01044e-11
263	GPC1	IDS	0.343453	8.57082e-12		263	DGKG	0.257731	4.34438e-07
264	GPC1	PRSS3	0.113167	0.0286518		264	FLYWCH1	0.363767	3.82438e-13
265	GPC1	ZNF200	0.0464857	0.370004		265	UNKL	0.248851	1.09746e-06
266	GPC1	CD4	0.105072	0.0422736		266	TBXAS1	0.310493	8.41558e-10
267	GPC1	LRRC23	0.142888	0.00563518		267	CDK17	0.202648	7.91603e-05
268	GPC1	BTK	0.141255	0.00621271		268	SLC2A3	0.182718	0.000382729
269	GPC1	HFE	0.0492518	0.342177		269	CTDP1	0.194286	0.000156307
270	GPC1	SCMH1	0.191535	0.000194339		270	STYK1	0.207124	5.43653e-05
271	GPC1	FYN	0.0358578	0.489341		271	GNA15	0.249657	1.01035e-06
272	GPC1	HIVEP2	0.136538	0.00819157		272	PTPRU	0.317793	3.19468e-10
273	GPC1	FMO1	-0.0678692	0.190316		273	COL11A1	0.30365	2.03764e-09
274	GPC1	ELOA	0.120537	0.0197126		274	ACAA1	-0.311314	7.55715e-10
275	GPC1	LYPLA2	0.0549056	0.289569		275	BCAT1	0.218578	2.0023e-05
276	GPC1	CLCN6	0.0892165	0.0848837		276	HDAC7	0.363585	3.93614e-13
277	GPC1	MRC2	0.44072	3.32946e-19		277	LZTS1	0.313127	5.95183e-10
278	GPC1	NME1-NME2	0.0165568	0.749618		278	PRDM6	0.285255	1.96339e-08
279	GPC1	SLC6A7	-0.0750565	0.147419		279	NCKAP1	0.249173	1.06174e-06
280	GPC1	TSPAN9	-0.120644	0.0196026		280	GUCY1B1	0.360744	6.16073e-13
281	GPC1	BTBD7	0.177744	0.000553479		281	CDH3	0.208128	4.99151e-05
282	GPC1	APBA3	0.124364	0.0161113		282	GPBP1	0.172547	0.000805497
283	GPC1	MKS1	0.0492765	0.341935		283	GPC1	1	0
284	GPC1	ABHD5	0.170038	0.000961884		284	LIMCH1	0.345587	6.24742e-12
285	GPC1	ANOS1	0.335262	2.82235e-11		285	TM7SF3	0.262477	2.60982e-07
286	GPC1	AKAP8L	0.123946	0.0164746		286	SPA17	0.31575	4.20069e-10
287	GPC1	MBTD1	-0.0912038	0.0781425		287	CCN5	0.245978	1.47025e-06
288	GPC1	UTP18	-0.0289008	0.577418		288	ATP2C2	0.183037	0.000373652
289	GPC1	RNF216	0.0406407	0.433248		289	NGFR	0.269009	1.27319e-07
290	GPC1	TTC19	0.157276	0.00228532		290	LPAR2	0.292541	8.15883e-09
291	GPC1	PTBP1	0.0252116	0.626957		291	SLC12A2	0.199707	0.000100882
292	GPC1	DPF1	0.182926	0.000376803		292	SNX24	0.225967	1.02155e-05
293	GPC1	SYT7	0.047203	0.362656		293	EYA2	0.238913	2.9722e-06
294	GPC1	LARS2	-0.0117408	0.820965		294	CNN2	0.2067	5.63513e-05
295	GPC1	PIK3C2A	0.107661	0.0374203		295	ABCA7	0.294276	6.59517e-09
296	GPC1	PLAUR	0.320315	2.27203e-10		296	BTBD1	0.285064	2.00842e-08
297	GPC1	ANLN	0.127792	0.0133888		297	SBNO2	0.245422	1.5552e-06
298	GPC1	WIZ	0.172953	0.000782522		298	HMG20B	0.209939	4.27447e-05
299	GPC1	RABGAP1	0.0454114	0.381179		299	CALCRL	0.189451	0.000228732
300	GPC1	DCN	0.354058	1.73799e-12		300	GLP2R	0.276856	5.24001e-08
301	GPC1	QPCTL	-0.179767	0.000476927		301	DGKA	0.186261	0.000292555
302	GPC1	PPP5C	0.188165	0.000252702		302	ROPN1	0.181707	0.000412841
303	GPC1	CEP68	0.17064	0.000921972		303	ANKRD44	0.263593	2.3119e-07
304	GPC1	MAP4K3	0.23554	4.12793e-06		304	ADAT1	0.224664	1.15219e-05
305	GPC1	ZBTB32	-0.0151804	0.769821		305	CYB5R4	0.197577	0.000119989
306	GPC1	TYROBP	0.18395	0.000348792		306	TLE2	0.190586	0.000209355
307	GPC1	TMEM159	0.396815	1.48381e-15		307	ME1	0.301074	2.82578e-09
308	GPC1	GABRA3	0.0955641	0.0648685		308	TBC1D1	0.174702	0.000690297
309	GPC1	BRCA1	0.0733487	0.156876		309	MTHFD2	0.184086	0.000345211
310	GPC1	ERCC1	-0.0487981	0.346647		310	SLC9A7	0.354866	1.53531e-12
311	GPC1	CD22	0.134325	0.00930019		311	FOXJ2	0.309989	8.98895e-10
312	GPC1	SEMA3B	0.113853	0.0276933		312	PDE4A	0.376879	4.5548e-14
313	GPC1	MBTPS2	-0.0237839	0.646605		313	CTNNA2	-0.211582	3.70887e-05
314	GPC1	PRICKLE3	0.19979	0.000100197		314	TIE1	0.204415	6.83088e-05
315	GPC1	LTF	0.0985956	0.0567788		315	KDM4A	0.191809	0.000190186
316	GPC1	EXTL3	0.140723	0.00641226		316	SLC9A3	0.18561	0.000307476
317	GPC1	NR1H4	-0.215547	2.62184e-05		317	CD84	0.173733	0.000740053
318	GPC1	ELOVL5	0.0642802	0.214886		318	ELOVL1	0.279895	3.68733e-08
319	GPC1	ALOX5	0.341739	1.10314e-11		319	SPI1	0.219167	1.89942e-05
320	GPC1	KDM5D	-0.00900109	0.862263		320	ATXN3	0.201095	9.00102e-05
321	GPC1	CALCOCO1	-0.0177988	0.731533		321	FGFR2	0.225241	1.09243e-05
322	GPC1	UBR7	0.219257	1.88411e-05		322	EML1	0.266535	1.67473e-07
323	GPC1	MAP4K5	0.196469	0.00013123		323	THUMPD1	0.188204	0.000251959
324	GPC1	EHD3	0.274048	7.22293e-08		324	MSANTD3	0.269266	1.23718e-07
325	GPC1	PSMC4	0.0287933	0.578835		325	KIF26A	0.217113	2.28219e-05
326	GPC1	MAN2B2	0.13724	0.00786547		326	ZFAT	0.218755	1.97091e-05
327	GPC1	SLC7A14	-0.0515128	0.32045		327	PFKP	0.367314	2.17128e-13
328	GPC1	CLDN11	0.227259	9.05972e-06		328	SP100	0.228096	8.37883e-06
329	GPC1	SLC25A39	0.198372	0.000112495		329	NEO1	0.30646	1.42107e-09
330	GPC1	MVP	0.420906	1.71977e-17		330	TNFRSF1A	0.270643	1.0607e-07
331	GPC1	NUB1	0.0646785	0.212052		331	CACNB1	0.377669	3.99437e-14
332	GPC1	PGM3	-0.0232822	0.653568		332	PKM	0.386036	9.72756e-15
333	GPC1	RWDD2A	-0.00765239	0.88274		333	METTL22	0.208881	4.68047e-05
334	GPC1	CLK1	0.0395762	0.445401		334	TP53BP1	0.24172	2.25278e-06
335	GPC1	POLR3B	0.0225527	0.663748		335	IDH3G	0.235852	4.00527e-06
336	GPC1	ANGEL1	0.0611823	0.237859		336	PDZD4	0.358597	8.61939e-13
337	GPC1	RNF14	0.149024	0.00387097		337	CBFB	0.185241	0.00031625
338	GPC1	DNASE1L1	0.252843	7.26618e-07		338	PDK3	0.267448	1.51399e-07
339	GPC1	DDX11	0.160552	0.00184097		339	HYAL2	0.191195	0.000199594
340	GPC1	HEBP1	0.201254	8.8837e-05		340	PLEKHH3	0.339539	1.52145e-11
341	GPC1	GPRC5A	0.158529	0.00210501		341	MEF2A	0.188223	0.000251578
342	GPC1	MAMLD1	0.266004	1.77559e-07		342	TFE3	0.258221	4.12353e-07
343	GPC1	CD6	0.0872759	0.091911		343	TBC1D25	0.210784	3.97427e-05
344	GPC1	TACC3	0.147253	0.00432015		344	FTSJ1	0.244754	1.6635e-06
345	GPC1	UFL1	-0.011663	0.822132		345	REEP1	0.214017	2.99955e-05
346	GPC1	POLA2	0.152887	0.00303424		346	TTC7A	0.304498	1.82828e-09
347	GPC1	ZC3H3	0.0507862	0.327331		347	SRBD1	0.195488	0.000141992
348	GPC1	CAPN1	0.293125	7.59676e-09		348	IFT80	0.269135	1.25541e-07
349	GPC1	ACP3	0.0665584	0.199039		349	PPP2R5B	0.268952	1.28124e-07
350	GPC1	MDH1	0.180199	0.000461903		350	PITX1	0.194191	0.0001575
351	GPC1	SLC30A9	0.158937	0.00204913		351	TRPC7	0.213881	3.03562e-05
352	GPC1	MTMR11	0.0786017	0.12918		352	BCL3	0.276873	5.22935e-08
353	GPC1	COX15	-0.140965	0.0063209		353	KCNAB2	0.283575	2.39573e-08
354	GPC1	CCDC88C	0.0439186	0.397045		354	FUNDC1	0.24504	1.61621e-06
355	GPC1	YAF2	0.102691	0.0471935		355	HES2	0.279835	3.71291e-08
356	GPC1	ZMYND11	0.183256	0.000367539		356	ATP1B3	0.244741	1.66557e-06
357	GPC1	WAS	0.15816	0.00215663		357	PIGB	0.173358	0.000760199
358	GPC1	DPEP1	0.12022	0.0200395		358	GNB5	0.254713	5.9757e-07
359	GPC1	BID	0.124141	0.0163037		359	RAB27A	0.240733	2.48445e-06
360	GPC1	MATR3	0.0864078	0.0952016		360	ELP1	-0.226824	9.43401e-06
361	GPC1	NPC1L1	-0.0541192	0.296542		361	SPTB	0.244008	1.79287e-06
362	GPC1	XYLT2	0.154204	0.00278891		362	EXOC5	0.226115	1.00762e-05
363	GPC1	RGPD5	-0.0276004	0.59467		363	FSTL3	0.413148	7.51642e-17
364	GPC1	STMN4	0.0257121	0.62013		364	DGCR2	0.209682	4.36992e-05
365	GPC1	NUDCD3	0.0721664	0.163687		365	MNT	0.239191	2.89228e-06
366	GPC1	ISL1	0.0370902	0.474526		366	POLB	-0.186968	0.000277121
367	GPC1	CHDH	-0.0588974	0.255875		367	FRMPD1	0.191296	0.00019802
368	GPC1	IL20RA	0.146954	0.00440072		368	AP3M2	0.261338	2.95218e-07
369	GPC1	CLCA1	0.0283539	0.584645		369	ST6GALNAC2	0.234927	4.37993e-06
370	GPC1	CLCA4	-0.0676925	0.191476		370	CHAT	0.245261	1.58067e-06
371	GPC1	GLT8D1	-0.251336	8.4966e-07		371	CDC42	0.259632	3.54666e-07
372	GPC1	ATP2C1	0.239419	2.82816e-06		372	OSBPL3	0.20869	4.75753e-05
373	GPC1	IGF1	0.0558823	0.281062		373	NCK2	0.315218	4.50933e-10
374	GPC1	SLC38A5	-0.000687477	0.989428		374	ARHGAP10	0.300911	2.88437e-09
375	GPC1	RALBP1	0.109521	0.0342321		375	RPS6KA2	0.276388	5.52929e-08
376	GPC1	RUFY3	0.195853	0.000137894		376	VASH1	0.39158	3.73022e-15
377	GPC1	CNTN1	0.129668	0.0120778		377	LMCD1	0.189985	0.000219416
378	GPC1	SLC11A1	0.161785	0.00169519		378	CYBRD1	0.259658	3.53678e-07
379	GPC1	WWTR1	0.285488	1.90975e-08		379	CDH19	0.169907	0.000970794
380	GPC1	AGPS	0.0676174	0.191969		380	ADGRL1	0.30576	1.55518e-09
381	GPC1	CXorf56	0.105154	0.0421124		381	PTPN18	0.192903	0.000174459
382	GPC1	ATP1A2	-0.0504355	0.330688		382	SPEG	0.290921	9.94033e-09
383	GPC1	TTC27	0.0471195	0.363507		383	TFRC	0.237625	3.37129e-06
384	GPC1	ZNF582	-0.167293	0.00116477		384	RHOBTB1	-0.202316	8.13709e-05
385	GPC1	VSIG2	0.158529	0.00210501		385	MARK2	0.294109	6.73191e-09
386	GPC1	PHLDB1	0.384522	1.25974e-14		386	P4HA2	0.224489	1.1709e-05
387	GPC1	MARCO	0.0680194	0.189334		387	FCGR2B	0.230999	6.3751e-06
388	GPC1	CYP24A1	0.103698	0.0450571		388	TRNT1	0.184737	0.00032859
389	GPC1	PRDM11	0.325521	1.11303e-10		389	STK10	0.292685	8.01695e-09
390	GPC1	SYT13	0.317158	3.47938e-10		390	FBXW11	0.241219	2.36776e-06
391	GPC1	SNAI2	0.190404	0.000212347		391	CRMP1	0.338093	1.87694e-11
392	GPC1	CD74	0.168825	0.0010471		392	EVC	0.281491	3.06061e-08
393	GPC1	HGF	0.214174	2.95862e-05		393	NDE1	0.283978	2.28426e-08
394	GPC1	ZRANB1	-0.0535122	0.302		394	IRAG1	0.290801	1.00862e-08
395	GPC1	NCDN	0.365182	3.0537e-13		395	SCARB1	-0.201156	8.95583e-05
396	GPC1	ADGRA2	0.34531	6.50979e-12		396	ALPK1	0.244344	1.73341e-06
397	GPC1	ZFP64	0.163744	0.0014854		397	PDE8A	0.211648	3.6878e-05
398	GPC1	MNAT1	-0.040192	0.438347		398	PPP2R3A	0.306349	1.44152e-09
399	GPC1	SAMD4A	-0.0208017	0.688433		399	CD5L	-0.21125	3.81716e-05
400	GPC1	RUNX3	0.160624	0.00183216		400	PTGS2	0.182865	0.000378538
401	GPC1	MRE11	0.106188	0.0401199		401	PICALM	0.195611	0.0001406
402	GPC1	PLEKHB1	0.0504582	0.330469		402	GLI2	0.235843	4.00886e-06
403	GPC1	SERPINB1	0.0776302	0.133995		403	CLASP1	0.192786	0.000176081
404	GPC1	CYP3A43	-0.157155	0.00230359		404	NOTCH3	0.289246	1.21744e-08
405	GPC1	SLC7A9	-0.246866	1.3436e-06		405	CLNS1A	-0.20395	7.10223e-05
406	GPC1	SPAST	-0.00819673	0.874465		406	PPP2R2C	0.324897	1.21332e-10
407	GPC1	NRXN3	0.00982923	0.849735		407	TEAD2	0.277119	5.08365e-08
408	GPC1	OSBPL5	0.466621	1.2799e-21		408	ATP2A3	0.246046	1.46013e-06
409	GPC1	AQR	0.116132	0.0247061		409	CA12	0.188592	0.000244507
410	GPC1	CPS1	-0.192961	0.000173657		410	MGLL	0.363601	3.9259e-13
411	GPC1	C8B	-0.0794319	0.125172		411	NUAK1	0.205891	6.0343e-05
412	GPC1	FHL1	0.246299	1.42313e-06		412	ZNF532	0.346727	5.27062e-12
413	GPC1	RTF2	0.0614477	0.235826		413	SCARF1	0.20548	6.24686e-05
414	GPC1	GABRA1	0.0187184	0.718236		414	ZZEF1	0.184092	0.000345073
415	GPC1	NLRP2	0.11923	0.0210931		415	ANO8	0.23077	6.51496e-06
416	GPC1	SLC45A4	0.221347	1.56014e-05		416	KCNQ2	0.198293	0.00011322
417	GPC1	RNF10	0.0447772	0.387871		417	TIPIN	0.212213	3.51138e-05
418	GPC1	ZNF839	-0.0242339	0.640385		418	SRI	0.220541	1.67831e-05
419	GPC1	ZDHHC6	0.0197678	0.703168		419	EIF4G3	0.233499	5.02427e-06
420	GPC1	GRAMD1B	0.31583	4.15586e-10		420	SEMA3C	0.309	1.02269e-09
421	GPC1	RNH1	0.164744	0.00138768		421	TTC38	-0.197703	0.000118774
422	GPC1	NDUFS1	0.106424	0.0396764		422	GRAMD4	0.220678	1.6576e-05
423	GPC1	RB1CC1	-0.0395736	0.445431		423	CELSR1	0.223012	1.34063e-05
424	GPC1	ERP44	-0.0769963	0.13721		424	TIMM21	0.184613	0.000331702
425	GPC1	ALAS1	-0.260905	3.09319e-07		425	ADD2	0.284648	2.1101e-08
426	GPC1	BIRC3	0.243046	1.97417e-06		426	VPS9D1	0.185897	0.000300808
427	GPC1	AKAP11	0.0369309	0.476427		427	MARK3	0.238615	3.06032e-06
428	GPC1	GLRX2	0.0226475	0.662422		428	FOSL2	0.315578	4.29817e-10
429	GPC1	SNAPC1	0.235792	4.02858e-06		429	FRYL	0.218179	2.07514e-05
430	GPC1	DERA	-0.164363	0.00142416		430	TMEM131	0.197959	0.000116328
431	GPC1	STRAP	0.0626674	0.226639		431	FSCN1	0.366104	2.63582e-13
432	GPC1	ABCC2	-0.251945	7.97732e-07		432	ACTB	0.244256	1.74876e-06
433	GPC1	DEF6	0.11867	0.0217105		433	PLD1	0.204884	6.56771e-05
434	GPC1	PLEKHO1	0.162522	0.00161333		434	BCAP29	0.189983	0.000219452
435	GPC1	GCLM	0.179804	0.000475623		435	KIFAP3	0.180021	0.000468057
436	GPC1	UBR2	-0.024817	0.632362		436	RBMS2	0.357196	1.07152e-12
437	GPC1	EHD2	0.418398	2.78207e-17		437	KLHL20	0.201894	8.42669e-05
438	GPC1	DEPDC1	0.129623	0.0121079		438	RGS11	0.279734	3.75712e-08
439	GPC1	CCDC28A	-0.0839448	0.105052		439	MCAM	0.252048	7.89251e-07
440	GPC1	RRAGD	-0.044557	0.390212		440	GPC4	0.303522	2.0712e-09
441	GPC1	HSF2	-0.00316213	0.951401		441	MBNL3	-0.377662	3.9992e-14
442	GPC1	PHF20	0.100594	0.0519183		442	RAP1GAP	0.31021	8.73268e-10
443	GPC1	HSD17B6	-0.0168969	0.744652		443	STXBP2	0.249969	9.78442e-07
444	GPC1	NR1H3	-0.212167	3.52546e-05		444	CTTNBP2	0.225819	1.03563e-05
445	GPC1	TYMP	0.306335	1.44424e-09		445	RARB	0.283463	2.42754e-08
446	GPC1	NCAPH2	0.102216	0.048231		446	NFKB2	0.203962	7.09531e-05
447	GPC1	TOMM34	0.0992986	0.0550275		447	PPP1R12B	0.234217	4.68953e-06
448	GPC1	SEC63	-0.0441112	0.394976		448	DNAJC10	0.202536	7.98995e-05
449	GPC1	KPNA6	0.221997	1.47075e-05		449	GTF3C1	0.306518	1.41043e-09
450	GPC1	VIM	0.244913	1.63695e-06		450	IL4R	0.342273	1.01989e-11
451	GPC1	RTEL1-TNFRSF6B	0.0814288	0.115928		451	USP33	0.169849	0.00097471
452	GPC1	FAS	0.03803	0.463395		452	CAPN6	0.260937	3.08238e-07
453	GPC1	RNASET2	0.0664452	0.199806		453	DYNC1I2	0.235391	4.18783e-06
454	GPC1	CD44	0.200639	9.34525e-05		454	APBB1IP	0.256086	5.17117e-07
455	GPC1	KCNG1	0.317449	3.34581e-10		455	LRCH4	0.172023	0.000836077
456	GPC1	AGPAT4	0.146835	0.00443282		456	SIRT6	0.191397	0.000196461
457	GPC1	SLAMF7	0.0281937	0.58677		457	POLD3	0.276298	5.58659e-08
458	GPC1	BTN3A1	0.11221	0.0300342		458	CAPZB	0.177138	0.000578572
459	GPC1	MIPEP	0.0673056	0.194031		459	GPR137B	0.186256	0.000292679
460	GPC1	PRKCH	0.156841	0.00235131		460	JADE1	0.222757	1.37233e-05
461	GPC1	INSRR	0.299592	3.40537e-09		461	SLC25A43	0.223033	1.33814e-05
462	GPC1	IFNGR1	-0.0442539	0.393447		462	UBE2A	0.193097	0.000171799
463	GPC1	B4GALT7	0.0975605	0.0594416		463	FGFR1	0.370075	1.39063e-13
464	GPC1	SH2D2A	0.140061	0.00666836		464	FBLN1	0.182754	0.00038171
465	GPC1	VRK2	0.209656	4.37945e-05		465	ITGA8	0.253044	7.11573e-07
466	GPC1	TNFRSF1B	0.213204	3.2209e-05		466	MAP2	0.232922	5.30921e-06
467	GPC1	VEZT	0.275265	6.28731e-08		467	AMPH	0.343871	8.05788e-12
468	GPC1	POU2F2	0.116857	0.0238151		468	ARAF	0.236908	3.61524e-06
469	GPC1	BRD9	0.125703	0.0149954		469	FAP	0.419462	2.26962e-17
470	GPC1	SNX1	0.155395	0.0025828		470	NEBL	0.248499	1.13771e-06
471	GPC1	TBPL1	0.0998904	0.0535881		471	ACER3	0.333626	3.5661e-11
472	GPC1	ARNTL2	0.374919	6.29914e-14		472	TIGAR	0.306985	1.32806e-09
473	GPC1	BCLAF1	0.046562	0.369218		473	TULP3	0.183374	0.000364283
474	GPC1	SLC39A9	0.0710833	0.170119		474	SYNJ2	0.170667	0.000920213
475	GPC1	ANK1	0.244707	1.67125e-06		475	GNB1	0.216253	2.46307e-05
476	GPC1	IBSP	0.200602	9.37401e-05		476	EDN1	0.196558	0.000130288
477	GPC1	TFB1M	-0.162663	0.00159799		477	BRINP1	0.184352	0.000338343
478	GPC1	RABEP1	0.0542742	0.295159		478	SDF4	0.246887	1.34072e-06
479	GPC1	HMGB3	0.313905	5.36887e-10		479	TP73	0.171489	0.000868365
480	GPC1	NUP160	0.0372236	0.472936		480	RUNX1T1	0.253047	7.1131e-07
481	GPC1	BAK1	0.296962	4.7309e-09		481	OSBPL6	0.197404	0.00012168
482	GPC1	MUSK	-0.0163921	0.752026		482	XRCC5	0.175531	0.000650234
483	GPC1	IKZF2	0.202959	7.71356e-05		483	LXN	0.271801	9.31331e-08
484	GPC1	GRN	0.232305	5.63115e-06		484	TNS1	0.287089	1.57781e-08
485	GPC1	FAM13B	0.154785	0.00268662		485	OPHN1	0.192348	0.00018228
486	GPC1	ARHGAP31	0.281451	3.07496e-08		486	CARMIL1	0.326368	9.89846e-11
487	GPC1	CENPQ	0.080658	0.119431		487	DNM2	0.240286	2.59669e-06
488	GPC1	SARS1	0.13496	0.00896927		488	EPB41L2	0.173438	0.000755864
489	GPC1	RANBP3	0.104246	0.0439293		489	MOXD1	0.39557	1.85054e-15
490	GPC1	ARID4A	0.0469194	0.365551		490	STX7	0.191225	0.000199127
491	GPC1	EIPR1	0.192543	0.000179495		491	CRYBG3	0.21745	2.21469e-05
492	GPC1	PNPLA6	0.167733	0.00112978		492	EPHA6	0.188933	0.000238124
493	GPC1	IFT88	-0.112836	0.0291227		493	SCTR	0.251019	8.78015e-07
494	GPC1	ALG1	0.176695	0.000597545		494	RFX3	0.201434	8.75269e-05
495	GPC1	ZCCHC8	0.00628954	0.90351		495	SLC4A4	0.182814	0.000379982
496	GPC1	ABCF2	0.120879	0.019364		496	SMARCA2	0.176599	0.000601724
497	GPC1	CHPF2	0.216731	2.3608e-05		497	MID2	0.200435	9.5033e-05
498	GPC1	LRRC7	0.109251	0.0346804		498	SRCAP	0.240672	2.4993e-06
499	GPC1	FUT8	0.250128	9.62592e-07		499	PUM3	0.173558	0.000749391
500	GPC1	UBA6	0.177683	0.000555965		500	CPB2	-0.280995	3.24329e-08
501	GPC1	GAB2	0.0893418	0.0844452		501	CLDND1	0.238056	3.23253e-06
502	GPC1	ATP6V0A1	0.00642519	0.90144		502	RBL1	0.186308	0.000291499
503	GPC1	PIAS1	0.0532729	0.304171		503	DLGAP4	0.22414	1.20903e-05
504	GPC1	SLC4A7	0.203199	7.56108e-05		504	AFP	-0.253896	6.50979e-07
505	GPC1	APBA2	0.174245	0.000713378		505	COL4A4	0.281562	3.03533e-08
506	GPC1	MAP2K3	0.105836	0.0407887		506	TCF7	-0.198556	0.000110816
507	GPC1	EFCAB1	-0.00687123	0.894636		507	OSTM1	0.207735	5.16106e-05
508	GPC1	TMSB10	0.28799	1.41623e-08		508	EXD2	0.213957	3.01547e-05
509	GPC1	ASTE1	0.0460461	0.374552		509	MEF2C	0.214566	2.85856e-05
510	GPC1	RNF19A	0.288405	1.34734e-08		510	PKP1	0.209379	4.48476e-05
511	GPC1	PEX3	-0.0906176	0.0800841		511	STK17B	0.272956	8.17495e-08
512	GPC1	GABARAPL2	0.075788	0.143504		512	AACS	0.235401	4.18373e-06
513	GPC1	MYOC	0.06769	0.191492		513	SMARCD3	0.427098	5.15371e-18
514	GPC1	SH3YL1	0.221303	1.56643e-05		514	PGR	0.178569	0.000520987
515	GPC1	FAM136A	-0.0817548	0.114471		515	C1QTNF3	-0.184961	0.000323052
516	GPC1	VCL	0.358573	8.65082e-13		516	ME2	0.205828	6.06599e-05
517	GPC1	DEPDC1B	0.131485	0.010917		517	CCNT2	0.219794	1.7952e-05
518	GPC1	DAPK2	0.118665	0.021716		518	EPB41L3	0.221862	1.48884e-05
519	GPC1	NSMAF	0.17066	0.000920697		519	COBLL1	-0.239207	2.88768e-06
520	GPC1	ADSS2	0.093825	0.0699219		520	DLG3	0.312425	6.5295e-10
521	GPC1	STAP1	0.0169428	0.743983		521	TRAF5	0.243472	1.8919e-06
522	GPC1	TIMP2	0.392397	3.23376e-15		522	NFE2L1	0.17677	0.000594278
523	GPC1	RFC1	-0.0243449	0.638854		523	SEMA5B	0.210736	3.99058e-05
524	GPC1	TBC1D23	0.0775136	0.134582		524	GSK3B	0.171693	0.00085589
525	GPC1	CUL3	0.193828	0.000162117		525	ITGB5	0.299869	3.28916e-09
526	GPC1	MYOM2	0.205257	6.3651e-05		526	ERC1	0.214417	2.8963e-05
527	GPC1	OTC	-0.197437	0.000121358		527	XPO1	0.19085	0.000205066
528	GPC1	CYP46A1	0.13771	0.00765364		528	ULK2	0.171254	0.000882911
529	GPC1	ZZZ3	0.0971806	0.0604444		529	GRHL2	0.172594	0.000802784
530	GPC1	SLC18A1	-0.00383057	0.941144		530	PLOD1	0.197804	0.000117798
531	GPC1	USP2	0.192498	0.000180139		531	SLC27A5	-0.221125	1.5918e-05
532	GPC1	CASR	0.0461577	0.373394		532	ZMPSTE24	0.208681	4.76131e-05
533	GPC1	TUBG2	0.202633	7.92576e-05		533	SSH1	0.263502	2.33478e-07
534	GPC1	RPL26L1	0.103445	0.0455865		534	GSTP1	0.227191	9.11768e-06
535	GPC1	FLT4	0.213152	3.23546e-05		535	COL16A1	0.435785	9.1127e-19
536	GPC1	NSUN2	0.16225	0.00164308		536	TXLNA	0.209825	4.31634e-05
537	GPC1	FBXO42	0.202637	7.92274e-05		537	APOB	-0.332388	4.25221e-11
538	GPC1	MFAP3	0.131434	0.0109481		538	EFR3B	0.2587	3.9184e-07
539	GPC1	MRI1	0.0871507	0.0923797		539	KIF3C	0.393864	2.49998e-15
540	GPC1	METTL1	-0.0237336	0.647301		540	RAB10	0.308732	1.05891e-09
541	GPC1	HOXC8	0.190388	0.000212616		541	MAPRE3	0.368229	1.87414e-13
542	GPC1	AGA	0.0558758	0.281118		542	CD59	0.399236	9.6356e-16
543	GPC1	PI4K2B	-0.0689337	0.183441		543	CD82	0.329122	6.74045e-11
544	GPC1	BOD1L1	0.0773093	0.135615		544	MECOM	0.276703	5.33298e-08
545	GPC1	MAT2B	0.0460099	0.374928		545	WDR47	0.220464	1.69003e-05
546	GPC1	TLL1	0.245665	1.51744e-06		546	OVGP1	-0.299527	3.43346e-09
547	GPC1	EDC4	0.108181	0.0365051		547	SLC25A24	0.297578	4.38134e-09
548	GPC1	TRIO	0.29511	5.95121e-09		548	PILRA	0.199199	0.000105159
549	GPC1	VCAN	0.320125	2.3314e-10		549	IGSF9	0.175755	0.000639743
550	GPC1	CLEC16A	0.347842	4.46096e-12		550	ZNF213	0.362066	5.00475e-13
551	GPC1	MSR1	0.280511	3.43191e-08		551	AKR1B1	0.329017	6.84038e-11
552	GPC1	CDH1	0.184664	0.000330435		552	CTTN	0.217956	2.11688e-05
553	GPC1	MTREX	0.0675786	0.192225		553	TTC39A	0.277928	4.63124e-08
554	GPC1	DNAH5	0.176998	0.000584482		554	EPS15	0.207732	5.1626e-05
555	GPC1	ZFYVE16	0.118357	0.0220612		555	ORC1	0.180955	0.000436677
556	GPC1	RIPOR1	0.321506	1.93213e-10		556	MGST2	-0.274556	6.81671e-08
557	GPC1	C6	0.0325487	0.530318		557	ATG16L1	0.18826	0.000250869
558	GPC1	RAI14	0.0776958	0.133665		558	POMGNT1	0.232087	5.74947e-06
559	GPC1	SOX30	0.117931	0.0225479		559	RAD54L	0.191554	0.000194051
560	GPC1	PNKP	0.164793	0.00138303		560	MAST2	0.230668	6.5783e-06
561	GPC1	BEST2	0.0775212	0.134544		561	AQP6	-0.218166	2.07753e-05
562	GPC1	PHLPP2	0.175767	0.000639206		562	FOLH1	-0.230112	6.93329e-06
563	GPC1	SPDL1	0.140753	0.00640096		563	NME8	0.225968	1.02144e-05
564	GPC1	STAU2	-0.00816053	0.875015		564	ITPKC	0.243099	1.9637e-06
565	GPC1	SLC66A1	0.099955	0.0534329		565	FAT2	0.203665	7.27317e-05
566	GPC1	CTNS	0.017875	0.730428		566	LAT2	0.388855	5.98844e-15
567	GPC1	RTN4R	0.354788	1.55384e-12		567	NOX4	0.197459	0.000121138
568	GPC1	PHF23	0.0209117	0.686872		568	MTMR2	0.310263	8.67283e-10
569	GPC1	CDH10	-0.083607	0.106463		569	PPP1R15A	0.216043	2.5093e-05
570	GPC1	INPP4A	0.334155	3.30695e-11		570	TRIP6	0.180644	0.000446885
571	GPC1	RAB27B	0.238129	3.20928e-06		571	FTL	-0.174892	0.000680907
572	GPC1	PSMA4	0.0656005	0.205596		572	PIGS	0.250231	9.52381e-07
573	GPC1	MYO16	-0.0883296	0.0880397		573	ADAMTS2	0.382261	1.84898e-14
574	GPC1	LSG1	0.224888	1.12857e-05		574	CETP	-0.176038	0.000626752
575	GPC1	PARP3	0.246331	1.41864e-06		575	MMP2	0.414231	6.13215e-17
576	GPC1	TNC	0.333952	3.40426e-11		576	SH3BP2	0.185767	0.000303815
577	GPC1	THAP3	0.156478	0.00240753		577	NID2	0.22574	1.04319e-05
578	GPC1	RIPOR3	0.224077	1.21604e-05		578	KLHL42	0.240253	2.60507e-06
579	GPC1	TDP1	0.00431526	0.933713		579	DNM1L	0.185228	0.000316562
580	GPC1	AIFM2	-0.0508483	0.32674		580	RFX2	0.260334	3.28932e-07
581	GPC1	C2orf83	0.0581907	0.261633		581	GNA11	0.205669	6.1482e-05
582	GPC1	SPATA7	0.137541	0.00772903		582	REM1	0.236302	3.83456e-06
583	GPC1	MED17	0.160631	0.00183124		583	EPB41L1	0.221614	1.52278e-05
584	GPC1	RETSAT	-0.103273	0.0459483		584	DOCK9	0.275365	6.21581e-08
585	GPC1	CAPG	0.245069	1.61157e-06		585	ANKRD10	0.180119	0.000464663
586	GPC1	AP2S1	0.0465961	0.368867		586	COQ9	0.169932	0.000969077
587	GPC1	USH2A	0.00211582	0.96747		587	ARHGAP28	0.268865	1.29372e-07
588	GPC1	ZPBP	-0.0302898	0.559254		588	CRLS1	-0.327943	7.94909e-11
589	GPC1	TG	-0.0495205	0.339547		589	PPP1R13B	0.193239	0.000169879
590	GPC1	ADAM28	0.286409	1.71133e-08		590	SMOX	0.222613	1.39046e-05
591	GPC1	BARX2	0.153975	0.00283035		591	SLC4A11	0.244601	1.6892e-06
592	GPC1	DCUN1D1	0.150561	0.00351582		592	C20orf194	0.370641	1.26862e-13
593	GPC1	JADE2	0.159341	0.00199509		593	EBF4	0.250667	9.10554e-07
594	GPC1	ZIC2	0.0240927	0.642334		594	CPXM1	0.282	2.88355e-08
595	GPC1	LCP2	0.199605	0.000101729		595	TESC	0.225574	1.05935e-05
596	GPC1	TRIT1	0.13503	0.00893339		596	SLC8B1	0.354677	1.58053e-12
597	GPC1	ADRB1	0.0798276	0.123296		597	TMEM230	-0.189231	0.000232668
598	GPC1	GUCA2B	0.152901	0.00303155		598	DZANK1	0.279339	3.93316e-08
599	GPC1	CUL7	0.13283	0.0101225		599	LHX5	0.251092	8.71438e-07
600	GPC1	CTNNA1	0.149394	0.00378272		600	PXN	0.214931	2.76824e-05
601	GPC1	PHKA2	0.0893112	0.084552		601	SIRT4	-0.171031	0.000896927
602	GPC1	CNTLN	-0.0685444	0.185934		602	RPH3A	0.257174	4.60887e-07
603	GPC1	EPHA3	0.343674	8.29582e-12		603	PEBP1	-0.310013	8.96161e-10
604	GPC1	HSPA5	0.0178352	0.731006		604	TBX5	0.205891	6.03404e-05
605	GPC1	DSG2	0.300829	2.91455e-09		605	FUS	0.190533	0.000210212
606	GPC1	GEMIN8	0.205539	6.21564e-05		606	FXYD5	0.30604	1.50015e-09
607	GPC1	OFD1	0.178059	0.000540865		607	GRAMD1A	0.185632	0.000306952
608	GPC1	GPM6B	0.170403	0.000937529		608	HEPH	0.375261	5.95388e-14
609	GPC1	MAGEC2	-0.072782	0.160114		609	CMTM1	0.23347	5.03785e-06
610	GPC1	PREX2	0.0760426	0.142159		610	KCNH4	0.172793	0.000791527
611	GPC1	WDR37	0.105004	0.0424083		611	GMIP	0.275541	6.09205e-08
612	GPC1	YTHDC2	0.114447	0.0268864		612	ZBTB25	0.28048	3.44454e-08
613	GPC1	CTPS2	0.0965575	0.0621193		613	ARHGAP4	0.321378	1.96624e-10
614	GPC1	ATP6V1H	0.21245	3.43971e-05		614	GPATCH2L	0.197376	0.000121956
615	GPC1	POLR2B	0.115342	0.0257079		615	LTBP4	0.419927	2.07564e-17
616	GPC1	FAM214A	0.0254462	0.623753		616	SLC9A1	0.410244	1.29299e-16
617	GPC1	ARAP2	0.241318	2.34461e-06		617	RGS1	0.262257	2.67279e-07
618	GPC1	TPR	0.0180344	0.728118		618	ICAM1	0.17594	0.000631254
619	GPC1	CP	-0.0255364	0.622523		619	IRAK3	0.239801	2.72377e-06
620	GPC1	KIAA0556	0.242224	2.14267e-06		620	MUL1	0.214442	2.8899e-05
621	GPC1	DTNBP1	0.147101	0.00436106		621	P3H2	0.353344	1.93878e-12
622	GPC1	XK	-0.00767903	0.882335		622	THPO	-0.344185	7.69171e-12
623	GPC1	ANO2	0.0654414	0.206699		623	CHRD	-0.182677	0.000383903
624	GPC1	C12orf4	0.149262	0.00381406		624	RAB11FIP3	0.182803	0.000380295
625	GPC1	SCML1	-0.182402	0.000391931		625	GNPTG	0.213125	3.24307e-05
626	GPC1	WWC3	0.248301	1.1609e-06		626	CERS4	-0.277379	4.93395e-08
627	GPC1	ARHGAP6	0.31553	4.32555e-10		627	USP48	0.269163	1.25149e-07
628	GPC1	FAM184B	-0.0645423	0.213018		628	EFNB1	0.424484	8.59751e-18
629	GPC1	MAP4	0.257335	4.53073e-07		629	GLG1	0.247728	1.23087e-06
630	GPC1	GOPC	0.0179633	0.729148		630	TNRC6A	0.198396	0.000112272
631	GPC1	ROS1	0.127839	0.0133544		631	PITPNM2	0.171162	0.00088863
632	GPC1	USP28	0.113174	0.0286412		632	EXOC1	0.245111	1.60473e-06
633	GPC1	HDAC9	0.274416	6.92659e-08		633	OSBPL8	0.183396	0.000363699
634	GPC1	TSPAN17	0.358578	8.64486e-13		634	NLRC4	0.199641	0.000101427
635	GPC1	NOP16	-0.025335	0.62527		635	LAMB1	0.293459	7.29141e-09
636	GPC1	CC2D2A	0.238094	3.22033e-06		636	SLC26A4	0.174784	0.000686223
637	GPC1	RRM2B	0.100201	0.0528444		637	ABCC6	-0.19262	0.000178406
638	GPC1	ZNF800	0.0965558	0.062124		638	MAP3K20	0.358263	9.07897e-13
639	GPC1	TNFRSF17	-0.0537473	0.299879		639	SEL1L3	0.410935	1.13687e-16
640	GPC1	SNX29	0.329983	5.97325e-11		640	TF	-0.287715	1.46381e-08
641	GPC1	LMO3	0.123365	0.0169905		641	CDV3	0.177022	0.000583478
642	GPC1	MRPS10	-0.00854953	0.86911		642	APOH	-0.299	3.66792e-09
643	GPC1	GUCA1A	0.0873923	0.0914767		643	PITPNM3	0.244446	1.71577e-06
644	GPC1	RSF1	0.117266	0.0233259		644	CD200	0.256323	5.04362e-07
645	GPC1	VPS13D	0.28832	1.36114e-08		645	CCDC80	0.399102	9.87017e-16
646	GPC1	CELF2	0.243389	1.90756e-06		646	JPH4	0.169851	0.000974628
647	GPC1	FAM120A	0.116943	0.0237114		647	CEBPE	0.191817	0.000190068
648	GPC1	R3HDM1	0.0943453	0.0683775		648	SLC7A8	0.318112	3.06029e-10
649	GPC1	COL9A2	0.207186	5.40769e-05		649	SLC22A17	0.218297	2.05347e-05
650	GPC1	KITLG	0.126817	0.0141184		650	G2E3	0.212773	3.34423e-05
651	GPC1	ERCC8	0.107033	0.0385512		651	SEMA6A	0.27565	6.01715e-08
652	GPC1	ADAMTS6	0.0788115	0.128158		652	TYRO3	0.298886	3.72081e-09
653	GPC1	H6PD	0.0226945	0.661765		653	WDR76	0.172293	0.000820163
654	GPC1	VAMP3	0.137034	0.00795978		654	EZR	0.318777	2.79787e-10
655	GPC1	PER3	0.0636438	0.219471		655	CLSPN	0.208793	4.7158e-05
656	GPC1	UTS2	0.129849	0.0119571		656	UNC13D	0.268417	1.35978e-07
657	GPC1	TNFRSF9	-0.0375367	0.469219		657	DPYSL2	0.297503	4.42259e-09
658	GPC1	EPN3	0.217592	2.18672e-05		658	TGFB2	0.206085	5.93588e-05
659	GPC1	LTBP1	0.328268	7.59624e-11		659	SEC22C	0.261358	2.94577e-07
660	GPC1	RCN1	0.213764	3.06691e-05		660	XYLB	-0.241927	2.207e-06
661	GPC1	ELN	0.276034	5.7584e-08		661	CBX5	0.281153	3.18396e-08
662	GPC1	RFC2	0.288821	1.28145e-08		662	HOOK2	0.296776	4.84137e-09
663	GPC1	ARID1B	0.140784	0.00638927		663	EPB41L4B	-0.277523	4.85269e-08
664	GPC1	CLPTM1L	0.139407	0.00693016		664	PTGS1	0.355614	1.36827e-12
665	GPC1	NEDD4L	0.0736089	0.155407		665	SH2D3C	0.238552	3.07928e-06
666	GPC1	FOXP3	-0.0289913	0.576226		666	SEMA4G	-0.302137	2.46996e-09
667	GPC1	PPP1R3F	0.0797732	0.123553		667	IKZF5	-0.207039	5.47569e-05
668	GPC1	HEXB	0.0801776	0.121655		668	TLL2	0.227868	8.5597e-06
669	GPC1	PTCD2	-0.0505032	0.330037		669	IL11	0.235007	4.34603e-06
670	GPC1	NEXMIF	-0.0003995	0.993856		670	TREM2	0.299767	3.33146e-09
671	GPC1	JKAMP	0.17365	0.000744494		671	FKBP5	0.206987	5.49993e-05
672	GPC1	DKK3	0.0904137	0.0807687		672	EFHC1	0.215808	2.56204e-05
673	GPC1	ARHGEF5	0.25594	5.25183e-07		673	ITPR3	0.363966	3.70553e-13
674	GPC1	NFE2L3	0.278202	4.48675e-08		674	JAK2	0.257774	4.32433e-07
675	GPC1	MCUR1	0.0176733	0.733354		675	ABL1	0.244578	1.69321e-06
676	GPC1	LIMA1	0.216408	2.42947e-05		676	ACOT7	0.227262	9.0574e-06
677	GPC1	LETMD1	-0.0869869	0.092996		677	SH3GLB1	0.21026	4.15767e-05
678	GPC1	SLC4A8	0.227001	9.28019e-06		678	PCSK5	0.176404	0.000610343
679	GPC1	LAMC3	0.282199	2.81676e-08		679	SCD	-0.260703	3.16116e-07
680	GPC1	PTGER3	0.21478	2.80518e-05		680	PRTFDC1	0.211424	3.76005e-05
681	GPC1	TNIP3	0.0960179	0.0636006		681	PALMD	-0.177539	0.00056185
682	GPC1	MAPK9	0.170543	0.000928317		682	TSPAN15	0.36922	1.59711e-13
683	GPC1	COL23A1	0.258756	3.89497e-07		683	MZF1	0.206426	5.76758e-05
684	GPC1	BCAR1	0.362795	4.46038e-13		684	OCEL1	-0.243323	1.92016e-06
685	GPC1	FAM160A2	0.102906	0.0467312		685	MYO9B	0.212788	3.33996e-05
686	GPC1	HERPUD1	-0.00434931	0.933191		686	KCNK6	0.249079	1.07207e-06
687	GPC1	HOMER3	0.359189	7.85911e-13		687	FBXL19	0.248462	1.14202e-06
688	GPC1	RAD51	0.133987	0.00948083		688	HSD3B7	0.191969	0.000187804
689	GPC1	POLQ	0.145506	0.00480917		689	BCL7C	0.178779	0.000513018
690	GPC1	PIK3CB	0.197332	0.000122391		690	CBARP	0.236116	3.90408e-06
691	GPC1	CYBA	0.125563	0.0151088		691	IGFALS	0.174038	0.000724056
692	GPC1	THOC3	0.0318242	0.539515		692	MISP	0.205363	6.30876e-05
693	GPC1	HEBP2	0.0550133	0.288622		693	CEP170B	0.362669	4.55007e-13
694	GPC1	MPHOSPH9	0.0472877	0.361795		694	POLRMT	-0.172914	0.000784713
695	GPC1	PLEKHA5	0.0025925	0.960147		695	PALM	0.212387	3.45843e-05
696	GPC1	PRSS8	0.374258	7.02339e-14		696	KLHL22	0.224001	1.22452e-05
697	GPC1	SIKE1	0.0949129	0.0667244		697	MED15	0.251185	8.63045e-07
698	GPC1	RRP12	-0.036559	0.480881		698	SERPIND1	-0.313383	5.75307e-10
699	GPC1	FNIP2	0.245544	1.53608e-06		699	LZTR1	0.216155	2.48454e-05
700	GPC1	MSMO1	-0.250025	9.72843e-07		700	CECR2	-0.228407	8.13863e-06
701	GPC1	TTC17	-0.0063035	0.903297		701	OSM	0.254067	6.39421e-07
702	GPC1	ALX4	0.270312	1.10083e-07		702	CABIN1	0.303494	2.07845e-09
703	GPC1	FSTL4	0.0716051	0.166998		703	TBC1D10A	0.311029	7.845e-10
704	GPC1	FOXN3	-0.159824	0.00193217		704	SUSD2	0.3434	8.63866e-12
705	GPC1	METTL24	0.0406833	0.432765		705	GGT5	0.369001	1.65474e-13
706	GPC1	AKR7A2	0.109339	0.0345337		706	RNF215	0.282182	2.82239e-08
707	GPC1	MRTO4	0.0402442	0.437752		707	SLC35E4	0.44995	4.8443e-20
708	GPC1	NNAT	0.0409617	0.42962		708	CYTH4	0.201484	8.71697e-05
709	GPC1	USE1	-0.0444395	0.391464		709	ESS2	0.179335	0.000492405
710	GPC1	MCF2L2	0.165384	0.00132827		710	SLC25A1	-0.212032	3.56699e-05
711	GPC1	NRIP2	0.210883	3.94011e-05		711	PLA2G3	0.20631	5.82421e-05
712	GPC1	LAMA3	-0.0912773	0.0779017		712	LGALS1	0.368605	1.76377e-13
713	GPC1	AP5M1	0.21842	2.03084e-05		713	PIK3IP1	0.200032	9.82316e-05
714	GPC1	ANAPC4	0.114903	0.0262804		714	TFIP11	0.178115	0.000538629
715	GPC1	KCNQ1	0.294782	6.19644e-09		715	GCAT	-0.351712	2.48674e-12
716	GPC1	TRAPPC3	0.199512	0.0001025		716	CRYBB1	0.289522	1.17758e-08
717	GPC1	THRAP3	0.128718	0.012727		717	MICALL1	0.284857	2.05839e-08
718	GPC1	PHPT1	0.140382	0.00654286		718	CCDC134	0.221437	1.54743e-05
719	GPC1	ENTPD2	0.208349	4.89807e-05		719	PICK1	0.177135	0.000578686
720	GPC1	LY75	0.115289	0.0257766		720	SLC16A8	0.182729	0.000382422
721	GPC1	ARID4B	-0.0325368	0.530468		721	SEPTIN3	0.205003	6.5025e-05
722	GPC1	OPN3	0.16934	0.00101015		722	SLC5A1	0.204538	6.76136e-05
723	GPC1	SDCCAG8	0.180484	0.000452256		723	KDELR3	0.367937	1.96442e-13
724	GPC1	PTPRN	0.0963454	0.062698		724	CYP2D6	-0.239863	2.70706e-06
725	GPC1	HHAT	-0.0939611	0.0695153		725	DMC1	0.1733	0.000763398
726	GPC1	KIF1B	0.165303	0.00133565		726	RSPH14	0.19875	0.00010908
727	GPC1	FOXC1	0.209296	4.51713e-05		727	JOSD1	0.279873	3.69653e-08
728	GPC1	TBC1D22A	0.0715389	0.167391		728	GTPBP1	0.206448	5.75654e-05
729	GPC1	SYNE2	0.165837	0.00128767		729	RAB36	0.223383	1.29594e-05
730	GPC1	PLEKHH1	0.0373756	0.47113		730	SBF1	0.228366	8.16989e-06
731	GPC1	ATP9A	0.0827312	0.110192		731	CYB5R3	0.263825	2.25403e-07
732	GPC1	SPO11	-0.065537	0.206035		732	DNAL4	0.237393	3.44853e-06
733	GPC1	CBLN4	-0.218495	2.01724e-05		733	RHBDD3	0.215758	2.5734e-05
734	GPC1	CHRDL2	0.186616	0.000284718		734	TTLL1	0.219444	1.8526e-05
735	GPC1	FAM168A	0.146078	0.00464374		735	RASL10A	0.320891	2.1009e-10
736	GPC1	RELT	0.325086	1.18215e-10		736	AP1B1	0.306335	1.44426e-09
737	GPC1	GALC	0.163731	0.00148661		737	HMGXB4	0.191349	0.00019719
738	GPC1	NOP58	0.134085	0.00942808		738	APOBEC3H	0.228646	7.95813e-06
739	GPC1	SZRD1	0.286772	1.63867e-08		739	TSPO	0.408468	1.79686e-16
740	GPC1	KCNH2	0.204462	6.80447e-05		740	RASD2	0.347119	4.97072e-12
741	GPC1	CUL1	-0.00407559	0.937387		741	PDGFB	0.16975	0.00098153
742	GPC1	FAM114A2	0.0921992	0.0749331		742	ACR	-0.210632	4.0267e-05
743	GPC1	CYFIP2	0.175043	0.000673533		743	APOL4	0.199848	9.97253e-05
744	GPC1	TAB2	0.0341125	0.510739		744	MYH9	0.28191	2.91412e-08
745	GPC1	GINM1	0.123098	0.0172331		745	KIAA0930	0.182197	0.000397986
746	GPC1	EIF2AK2	0.13973	0.00679987		746	NCF4	0.189668	0.000224898
747	GPC1	USP36	-0.00916135	0.859836		747	CSF2RB	0.182093	0.000401105
748	GPC1	KMT2C	0.15235	0.00313977		748	SLC25A17	0.242278	2.13119e-06
749	GPC1	MCOLN3	0.173789	0.00073712		749	KCTD17	0.175782	0.000638513
750	GPC1	CCDC85A	0.135976	0.00846147		750	RBX1	0.197523	0.000120513
751	GPC1	PUM2	0.067454	0.193048		751	RANGAP1	0.210179	4.18682e-05
752	GPC1	MRPL43	-0.182601	0.000386096		752	ZC3H7B	0.176183	0.000620187
753	GPC1	ITIH4	-0.106495	0.0395444		753	ACO2	0.254502	6.10974e-07
754	GPC1	ITIH1	-0.312756	6.25027e-10		754	ABHD4	0.26733	1.53404e-07
755	GPC1	HPF1	0.159483	0.00197635		755	KHNYN	0.176705	0.000597128
756	GPC1	ZFR	0.0676859	0.191519		756	CDKL1	0.294428	6.47315e-09
757	GPC1	ZNF280C	0.0388208	0.454142		757	NIN	0.257202	4.59545e-07
758	GPC1	NPFFR2	-0.0837696	0.105782		758	DDHD1	0.19667	0.00012912
759	GPC1	PHF21B	0.20598	5.9891e-05		759	ATP6V1D	0.200943	9.11458e-05
760	GPC1	TRAF1	0.217192	2.26601e-05		760	PLEK2	0.224042	1.21995e-05
761	GPC1	RC3H2	0.014648	0.777678		761	PSMA3	0.17888	0.000509181
762	GPC1	IL17RB	-0.0348529	0.501603		762	SAMD15	0.217246	2.25525e-05
763	GPC1	TRAF3IP2	0.204913	6.55156e-05		763	ISM2	-0.176707	0.000597013
764	GPC1	GYG2	-0.194784	0.000150216		764	SPTLC2	0.259739	3.50612e-07
765	GPC1	DCBLD2	0.106156	0.040181		765	RIN3	0.208377	4.88626e-05
766	GPC1	SERPINB3	0.0423519	0.414116		766	ITPK1	0.220501	1.68436e-05
767	GPC1	SOAT1	0.16611	0.00126376		767	GALNT16	0.223227	1.31461e-05
768	GPC1	PKP2	0.0620521	0.231241		768	HIF1A	0.283425	2.43843e-08
769	GPC1	MSH4	0.151657	0.00328084		769	SUSD6	0.269166	1.25113e-07
770	GPC1	F7	-0.264065	2.19586e-07		770	SERPINA4	-0.216538	2.40158e-05
771	GPC1	GDI2	0.0207132	0.68969		771	SLC8A3	0.182502	0.000388983
772	GPC1	PRDM1	0.181713	0.000412659		772	ZFYVE21	0.280101	3.59997e-08
773	GPC1	ATG5	0.105544	0.0413504		773	TELO2	0.26779	1.45775e-07
774	GPC1	TMCC3	0.322272	1.74035e-10		774	BDKRB1	0.208188	4.96598e-05
775	GPC1	PITHD1	0.0961971	0.0631053		775	GSKIP	0.192654	0.000177929
776	GPC1	MTA3	0.114417	0.0269257		776	PAPLN	0.357846	9.68762e-13
777	GPC1	USP13	0.0682419	0.187888		777	RPS6KA5	0.181882	0.000407498
778	GPC1	ATP11B	0.240098	2.6452e-06		778	CCNB1IP1	-0.247402	1.27234e-06
779	GPC1	LAMC2	0.26721	1.55446e-07		779	EFS	0.313039	6.02111e-10
780	GPC1	CDK14	0.0769829	0.137279		780	PCK2	-0.185088	0.000319957
781	GPC1	SEC61A1	0.247567	1.25117e-06		781	NFKBIA	0.1993	0.000104294
782	GPC1	PPP1R12A	0.19757	0.000120058		782	BRMS1L	0.198331	0.000112866
783	GPC1	RASGRF1	-0.170092	0.000958262		783	NFATC4	0.253208	6.99468e-07
784	GPC1	CAMK2B	0.169727	0.000983081		784	PLTP	0.181517	0.000418749
785	GPC1	CROCC	0.342336	1.01044e-11		785	PYGB	0.365	3.14343e-13
786	GPC1	POLR3E	0.143862	0.00531393		786	ABHD12	0.227065	9.22483e-06
787	GPC1	ATP2B4	0.163189	0.0015423		787	PROCR	0.344252	7.61572e-12
788	GPC1	ZC3H11A	0.0778421	0.132933		788	IFT52	0.187838	0.00025917
789	GPC1	RIOK2	0.0171158	0.741461		789	HNF4A	-0.32319	1.53476e-10
790	GPC1	YIPF1	0.138386	0.00735771		790	DOK5	0.192605	0.000178626
791	GPC1	NDC1	0.131638	0.0108241		791	NTSR1	0.188583	0.000244663
792	GPC1	DGKG	0.257731	4.34438e-07		792	COL20A1	0.265978	1.7806e-07
793	GPC1	FLYWCH1	0.363767	3.82438e-13		793	EEF1A2	0.267973	1.42853e-07
794	GPC1	UNKL	0.248851	1.09746e-06		794	PTK6	0.368489	1.79715e-13
795	GPC1	TBXAS1	0.310493	8.41558e-10		795	SPEF1	0.223411	1.29259e-05
796	GPC1	PARP12	0.0721067	0.164037		796	CDC25B	0.257335	4.53091e-07
797	GPC1	ALDH18A1	-0.0897656	0.0829758		797	RNF24	0.356842	1.13189e-12
798	GPC1	TARBP1	-0.0802905	0.121129		798	RASSF2	0.256108	5.15923e-07
799	GPC1	GATB	0.0289791	0.576387		799	SLC52A3	0.258761	3.89296e-07
800	GPC1	MXD1	0.124505	0.0159904		800	SNPH	0.313172	5.91647e-10
801	GPC1	CDK17	0.202648	7.91603e-05		801	MYLK2	0.344188	7.68918e-12
802	GPC1	DNAJC25	-0.0897247	0.0831169		802	HAO1	-0.1867	0.000282882
803	GPC1	SLC2A3	0.182718	0.000382729		803	PLCB4	0.244721	1.66894e-06
804	GPC1	PSD	0.108897	0.0352756		804	MYL9	0.338876	1.67535e-11
805	GPC1	CTDP1	0.194286	0.000156307		805	HCK	0.18589	0.000300977
806	GPC1	YBX3	0.15884	0.00206219		806	TLDC2	0.312503	6.46242e-10
807	GPC1	STYK1	0.207124	5.43653e-05		807	MROH8	-0.244592	1.69074e-06
808	GPC1	WNK1	0.113093	0.0287561		808	JAG1	0.305696	1.5679e-09
809	GPC1	CCAR1	0.0422552	0.415184		809	CHMP4B	0.202761	7.84199e-05
810	GPC1	OGFR	0.0146827	0.777166		810	AHCY	-0.267718	1.46949e-07
811	GPC1	GNA15	0.249657	1.01035e-06		811	SYNDIG1	0.217797	2.14724e-05
812	GPC1	CREB3L3	-0.0988822	0.0560594		812	METTL4	0.227209	9.10178e-06
813	GPC1	PIGV	-0.059744	0.249092		813	SMAD7	0.181927	0.000406125
814	GPC1	PTPRU	0.317793	3.19468e-10		814	POLI	0.20211	8.2769e-05
815	GPC1	SNRNP40	0.14915	0.00384078		815	RBBP8	0.286667	1.65946e-08
816	GPC1	RIMBP2	0.151486	0.0033166		816	RIOK3	0.229293	7.48935e-06
817	GPC1	COL11A1	0.30365	2.03764e-09		817	MXRA5	0.384283	1.31205e-14
818	GPC1	QSER1	0.121718	0.0185325		818	STS	0.324995	1.197e-10
819	GPC1	MPC1	-0.0368894	0.476922		819	POLA1	0.211294	3.80283e-05
820	GPC1	ACAA1	-0.311314	7.55715e-10		820	PRPS2	0.173534	0.000750692
821	GPC1	BCAT1	0.218578	2.0023e-05		821	CHRDL1	0.245232	1.5852e-06
822	GPC1	HDAC7	0.363585	3.93614e-13		822	WDR13	0.297042	4.68376e-09
823	GPC1	LZTS1	0.313127	5.95183e-10		823	PAGE4	-0.223897	1.23636e-05
824	GPC1	PRDM6	0.285255	1.96339e-08		824	SRPX	0.383371	1.5321e-14
825	GPC1	WNT8A	-0.101206	0.0505004		825	XIAP	0.171819	0.00084828
826	GPC1	SPAG4	-0.0754108	0.145512		826	CCDC22	0.219518	1.84045e-05
827	GPC1	NCKAP1	0.249173	1.06174e-06		827	CACNA1F	0.17181	0.000848828
828	GPC1	MRPS35	-0.0669118	0.196659		828	PLP2	0.362249	4.86227e-13
829	GPC1	GUCY1B1	0.360744	6.16073e-13		829	RENBP	0.171045	0.000895999
830	GPC1	SFSWAP	0.0457725	0.377399		830	ELF4	0.29654	4.98565e-09
831	GPC1	TNK2	0.131121	0.0111413		831	SMARCA1	-0.180332	0.000457365
832	GPC1	MON2	0.100152	0.0529622		832	RBBP7	0.221063	1.60079e-05
833	GPC1	CDH3	0.208128	4.99151e-05		833	KCND1	0.378694	3.36731e-14
834	GPC1	ARSF	0.117728	0.0227834		834	SCML2	-0.188968	0.000237469
835	GPC1	GPBP1	0.172547	0.000805497		835	PGK1	0.25121	8.60871e-07
836	GPC1	DGAT2	-0.084725	0.101848		836	SMS	0.187365	0.000268787
837	GPC1	ZNF112	0.0957921	0.0642288		837	PHEX	0.265153	1.94942e-07
838	GPC1	CS	0.0419808	0.418222		838	UBL4A	0.243359	1.91331e-06
839	GPC1	LTK	0.130278	0.0116764		839	CD99L2	0.19577	0.000138816
840	GPC1	MRPS24	0.0391435	0.450396		840	RP2	0.204106	7.01005e-05
841	GPC1	ELMO2	0.0949395	0.0666479		841	CDK16	0.291599	9.15345e-09
842	GPC1	WAPL	0.033229	0.521754		842	PCYT1B	0.245226	1.58615e-06
843	GPC1	VMP1	0.162781	0.00158537		843	TIMP1	0.387773	7.21742e-15
844	GPC1	APPBP2	0.107018	0.0385801		844	KLHL4	0.262362	2.64264e-07
845	GPC1	POLD1	0.0535047	0.302069		845	GABRE	0.173121	0.000773219
846	GPC1	SEZ6	0.0115368	0.824024		846	PORCN	0.406517	2.57338e-16
847	GPC1	EIF4B	-0.118937	0.0214145		847	RBM3	0.216826	2.3411e-05
848	GPC1	SLC6A16	0.0259014	0.617557		848	KLF8	0.187352	0.000269068
849	GPC1	BICRA	0.132604	0.0102524		849	SRPX2	0.417523	3.28699e-17
850	GPC1	SPHK2	-0.0161771	0.755175		850	ZDHHC15	0.177758	0.00055293
851	GPC1	RPL18	-0.122966	0.0173536		851	DRP2	0.227886	8.54511e-06
852	GPC1	CA11	0.156534	0.00239885		852	ARMCX3	0.197787	0.000117962
853	GPC1	ISOC2	-0.128037	0.0132107		853	RUBCNL	0.250641	9.13002e-07
854	GPC1	U2AF2	0.0968424	0.0613488		854	NALCN	0.27051	1.07667e-07
855	GPC1	EPN1	-0.0377283	0.466952		855	HTR2A	0.235687	4.06966e-06
856	GPC1	MED29	0.0446567	0.38915		856	TNFSF13B	0.272852	8.27151e-08
857	GPC1	AHRR	0.0371244	0.474118		857	CDADC1	-0.243201	1.94373e-06
858	GPC1	GSC2	-0.0769319	0.13754		858	KLF5	0.240494	2.54376e-06
859	GPC1	ZNF275	-0.0185335	0.720903		859	ARHGEF7	0.195421	0.000142754
860	GPC1	MTMR1	0.0642088	0.215397		860	MRPS31	-0.302782	2.27579e-09
861	GPC1	GPC1	1	0		861	DGKH	0.241758	2.24443e-06
862	GPC1	ADCK1	0.166411	0.00123786		862	KATNAL1	0.299156	3.59701e-09
863	GPC1	HAGH	-0.0309578	0.550619		863	DHRS12	-0.225035	1.11338e-05
864	GPC1	RNF4	0.166366	0.00124169		864	MEDAG	0.287834	1.44299e-08
865	GPC1	CASP8	0.16256	0.0016092		865	MGRN1	0.26428	2.1449e-07
866	GPC1	LIMCH1	0.345587	6.24742e-12		866	ELMO3	0.259231	3.70215e-07
867	GPC1	INTS13	0.0140258	0.78689		867	LYRM1	-0.189432	0.000229066
868	GPC1	TM7SF3	0.262477	2.60982e-07		868	CBLN1	-0.197228	0.000123425
869	GPC1	DLX3	0.140412	0.00653158		869	ARL2BP	0.180469	0.000452734
870	GPC1	SPA17	0.31575	4.20069e-10		870	PLLP	0.246299	1.42317e-06
871	GPC1	TSPAN32	0.146953	0.0044009		871	ZNF423	0.229017	7.68603e-06
872	GPC1	CCN5	0.245978	1.47025e-06		872	CCL22	0.218656	1.98837e-05
873	GPC1	DMRT3	0.103723	0.0450052		873	CCL17	0.18539	0.000312678
874	GPC1	ST3GAL6	-0.0578427	0.264502		874	MMP15	0.30756	1.23282e-09
875	GPC1	ATP2C2	0.183037	0.000373652		875	USB1	0.245987	1.46888e-06
876	GPC1	NGFR	0.269009	1.27319e-07		876	NDRG4	0.247548	1.25361e-06
877	GPC1	CDON	-0.00196343	0.969812		877	PSMD7	0.185885	0.000301098
878	GPC1	TAF2	0.160203	0.00188425		878	VAC14	0.171995	0.00083777
879	GPC1	HIPK2	0.0105095	0.839471		879	PLA2G15	0.225007	1.11633e-05
880	GPC1	TNPO3	0.105938	0.040594		880	FA2H	0.225593	1.05753e-05
881	GPC1	BORCS8-MEF2B	0.0320497	0.536644		881	WDR59	-0.184527	0.000333885
882	GPC1	RFXANK	0.0648754	0.210661		882	MON1B	0.170379	0.000939078
883	GPC1	TMEM161A	-0.0407154	0.432402		883	AXIN1	0.312637	6.34956e-10
884	GPC1	LPAR2	0.292541	8.15883e-09		884	HCFC1R1	0.235878	3.99524e-06
885	GPC1	CTSA	0.115101	0.0260214		885	NPRL3	0.210997	3.90169e-05
886	GPC1	SUGP2	0.160727	0.00181957		886	TAF1C	0.23175	5.93701e-06
887	GPC1	SLC12A2	0.199707	0.000100882		887	WFDC1	0.33625	2.44898e-11
888	GPC1	SNX24	0.225967	1.02155e-05		888	COTL1	0.192767	0.000176341
889	GPC1	EYA2	0.238913	2.9722e-06		889	CRISPLD2	0.352008	2.3772e-12
890	GPC1	CNN2	0.2067	5.63513e-05		890	TSC2	0.233992	4.79225e-06
891	GPC1	ABCA7	0.294276	6.59517e-09		891	ZNF500	0.274283	7.03233e-08
892	GPC1	SNCAIP	0.066464	0.199679		892	ABCC1	0.467542	1.04094e-21
893	GPC1	DDX20	0.032353	0.532794		893	FOXF1	0.346761	5.24437e-12
894	GPC1	BTBD1	0.285064	2.00842e-08		894	CIAO3	0.211121	3.85993e-05
895	GPC1	FAR2	0.127024	0.0139605		895	MTHFSD	0.172598	0.000802607
896	GPC1	BCAS1	-0.0323882	0.532349		896	CLCN7	0.223547	1.27665e-05
897	GPC1	POU1F1	0.0328618	0.526368		897	HAGHL	0.278403	4.38406e-08
898	GPC1	CHI3L2	0.152875	0.00303659		898	ANTKMT	0.178195	0.000535509
899	GPC1	SBNO2	0.245422	1.5552e-06		899	SLC7A5	0.234706	4.47421e-06
900	GPC1	PMS1	0.0783027	0.130647		900	METRN	0.347059	5.01581e-12
901	GPC1	HMG20B	0.209939	4.27447e-05		901	FBXO31	-0.243874	1.8172e-06
902	GPC1	CALCRL	0.189451	0.000228732		902	STUB1	0.247769	1.22576e-06
903	GPC1	TAF11	-0.0513384	0.322093		903	NUBP1	0.17889	0.000508818
904	GPC1	ANKS1A	0.163806	0.00147914		904	UBE2I	0.18091	0.000438146
905	GPC1	AP3D1	0.0897278	0.0831061		905	EEF2K	0.289945	1.11879e-08
906	GPC1	ZNF76	-0.0345044	0.505892		906	PIEZO1	0.362439	4.71867e-13
907	GPC1	SLC9A3R2	-0.0240681	0.642674		907	GSPT1	0.200534	9.42611e-05
908	GPC1	NTHL1	0.0255043	0.622961		908	BFAR	0.170845	0.000908745
909	GPC1	UHRF1BP1	0.0815304	0.115472		909	SALL1	-0.203179	7.57362e-05
910	GPC1	GNAI3	0.165069	0.00135723		910	TOX3	-0.290654	1.02673e-08
911	GPC1	IPO5	-0.0359742	0.487931		911	QPRT	-0.197058	0.000125139
912	GPC1	OAT	-0.154872	0.00267152		912	XYLT1	0.386848	8.46275e-15
913	GPC1	WDR3	0.0487613	0.347012		913	PYCARD	0.295941	5.36988e-09
914	GPC1	PKN2	0.0995996	0.0542914		914	RPGRIP1L	0.244107	1.77526e-06
915	GPC1	WDR18	-0.079807	0.123393		915	STX4	0.247829	1.21822e-06
916	GPC1	TRAM2	0.144725	0.00504338		916	NOMO1	0.229932	7.05212e-06
917	GPC1	NTN1	0.130494	0.0115371		917	SYT17	0.253288	6.93695e-07
918	GPC1	GLP2R	0.276856	5.24001e-08		918	VPS35L	0.181869	0.000407892
919	GPC1	MCM10	0.106213	0.0400733		919	RNF40	0.19429	0.000156259
920	GPC1	DGKA	0.186261	0.000292555		920	KNOP1	0.328859	6.99328e-11
921	GPC1	ERBB3	-0.165044	0.00135953		921	AQP9	-0.218948	1.93714e-05
922	GPC1	ROPN1	0.181707	0.000412841		922	AAGAB	0.257887	4.27271e-07
923	GPC1	ANKRD44	0.263593	2.3119e-07		923	IQCH	-0.29373	7.05263e-09
924	GPC1	KARS1	0.0665844	0.198864		924	CORO2B	0.379723	2.83483e-14
925	GPC1	ADAT1	0.224664	1.15219e-05		925	RASL12	0.366022	2.67051e-13
926	GPC1	PDIA5	0.0389137	0.453062		926	CTSH	0.267157	1.56352e-07
927	GPC1	TBC1D22B	0.142177	0.00588041		927	CD276	0.281071	3.21464e-08
928	GPC1	NDUFB4	0.0529985	0.306672		928	CEMIP	0.208466	4.8494e-05
929	GPC1	SPEN	0.165811	0.00128999		929	HOMER2	0.240628	2.51041e-06
930	GPC1	MYLK	0.135755	0.00856927		930	EHD4	0.251021	8.77828e-07
931	GPC1	ZC3H15	0.107497	0.037713		931	TMEM87A	0.279663	3.78801e-08
932	GPC1	MAP2K4	0.0167522	0.746763		932	ZNF106	0.199362	0.000103772
933	GPC1	PACC1	0.138237	0.00742182		933	ATP8B4	0.260182	3.34344e-07
934	GPC1	SNAP91	0.115278	0.0257916		934	TGM5	0.18964	0.000225386
935	GPC1	SLK	0.0134827	0.794955		935	FAM189A1	0.205517	6.22755e-05
936	GPC1	CYB5R4	0.197577	0.000119989		936	TJP1	0.201161	8.9523e-05
937	GPC1	COL17A1	0.144696	0.00505202		937	RHOV	0.283099	2.53408e-08
938	GPC1	GSTO2	-0.146033	0.00465649		938	VPS18	0.278317	4.42781e-08
939	GPC1	SEC61A2	-0.0777342	0.133473		939	SLC30A4	0.213779	3.06289e-05
940	GPC1	PRKCQ	0.133361	0.00982306		940	ZDHHC2	0.181554	0.000417601
941	GPC1	TLE2	0.190586	0.000209355		941	CA2	0.199536	0.000102306
942	GPC1	ASB1	0.107152	0.0383346		942	NBN	0.17554	0.000649793
943	GPC1	FAM107B	-0.0323466	0.532875		943	SFRP1	0.328423	7.43346e-11
944	GPC1	ME1	0.301074	2.82578e-09		944	UBE2W	0.175658	0.000644243
945	GPC1	TBC1D1	0.174702	0.000690297		945	POP1	0.238276	3.16355e-06
946	GPC1	CDK13	-0.0101474	0.844931		946	PLAT	0.336754	2.27744e-11
947	GPC1	MTHFD2	0.184086	0.000345211		947	JPH1	0.292354	8.3481e-09
948	GPC1	SLC9A7	0.354866	1.53531e-12		948	DKK4	-0.311354	7.51734e-10
949	GPC1	FOXJ2	0.309989	8.98895e-10		949	ESRP1	0.237195	3.5157e-06
950	GPC1	YBX1	0.0791926	0.126317		950	CCN4	0.389194	5.64778e-15
951	GPC1	PDE4A	0.376879	4.5548e-14		951	ZC2HC1A	0.183995	0.000347611
952	GPC1	PPP2R5A	-0.0622667	0.229629		952	STMN2	0.357077	1.09149e-12
953	GPC1	CTNNA2	-0.211582	3.70887e-05		953	TRPS1	0.173777	0.000737748
954	GPC1	ELAVL1	0.137883	0.00757695		954	SPAG1	0.276563	5.41941e-08
955	GPC1	TIE1	0.204415	6.83088e-05		955	NCALD	0.264292	2.14209e-07
956	GPC1	DIP2B	0.13297	0.0100428		956	ANXA13	0.188199	0.000252056
957	GPC1	SMARCD1	0.138563	0.0072818		957	SH2D4A	-0.171416	0.00087283
958	GPC1	KDM4A	0.191809	0.000190186		958	MTMR9	0.196325	0.000132758
959	GPC1	NFYC	0.107002	0.0386077		959	LEPROTL1	0.224587	1.1603e-05
960	GPC1	ZMYND12	-0.0743877	0.151069		960	GSR	0.218651	1.98942e-05
961	GPC1	SLC9A3	0.18561	0.000307476		961	TUSC3	0.238501	3.09463e-06
962	GPC1	NGEF	-0.12805	0.0132013		962	ARHGEF10	0.374576	6.66513e-14
963	GPC1	ASPM	0.0784064	0.130137		963	KCTD9	0.201986	8.36253e-05
964	GPC1	CD84	0.173733	0.000740053		964	ASAH1	0.210951	3.91732e-05
965	GPC1	ELOVL1	0.279895	3.68733e-08		965	BNIP3L	0.170384	0.000938741
966	GPC1	SPI1	0.219167	1.89942e-05		966	MAN2B1	0.202873	7.76931e-05
967	GPC1	ZNRD1	-0.130007	0.0118532		967	GYS1	0.187719	0.000261553
968	GPC1	MPPED2	0.0395387	0.445833		968	LHB	0.216425	2.42596e-05
969	GPC1	CLDN18	0.0116045	0.823009		969	KCNA7	0.211128	3.85767e-05
970	GPC1	ZBTB11	0.0855809	0.0984228		970	RELB	0.234795	4.43575e-06
971	GPC1	ATXN3	0.201095	9.00102e-05		971	FCGRT	-0.247132	1.30787e-06
972	GPC1	GOLGA5	0.0154321	0.766115		972	ARHGEF18	0.207128	5.43466e-05
973	GPC1	FGFR2	0.225241	1.09243e-05		973	PPP1R13L	0.273786	7.44063e-08
974	GPC1	LRRC40	0.00453653	0.930323		974	ERCC2	-0.214662	2.83448e-05
975	GPC1	ISOC1	-0.096721	0.0616761		975	SLC17A7	0.325633	1.09596e-10
976	GPC1	EML1	0.266535	1.67473e-07		976	KLC3	0.244019	1.79088e-06
977	GPC1	TRMT11	0.115095	0.0260292		977	CD37	0.195968	0.000136627
978	GPC1	THUMPD1	0.188204	0.000251959		978	AMH	0.177738	0.000553718
979	GPC1	MSANTD3	0.269266	1.23718e-07		979	LYL1	0.260914	3.09015e-07
980	GPC1	KIF26A	0.217113	2.28219e-05		980	OAZ1	0.201422	8.76181e-05
981	GPC1	ATG2B	0.0903148	0.0811025		981	STX10	0.193578	0.000165365
982	GPC1	ARFGEF1	0.137433	0.00777774		982	DMPK	0.198634	0.000110115
983	GPC1	ACSM2B	-0.094204	0.0687941		983	TLE5	0.197385	0.000121872
984	GPC1	ZFAT	0.218755	1.97091e-05		984	NOVA2	0.279724	3.76122e-08
985	GPC1	MTFR1	-0.129598	0.0121244		985	SNAPC2	0.208288	4.9237e-05
986	GPC1	STAG3	0.0921525	0.0750811		986	IL27RA	0.289428	1.19101e-08
987	GPC1	FECH	0.137637	0.007686		987	TNNT1	0.309532	9.5413e-10
988	GPC1	MYO9A	0.161107	0.00177395		988	OLFM2	0.213566	3.12045e-05
989	GPC1	DDX3Y	-0.0403294	0.436781		989	RASAL3	0.210033	4.23976e-05
990	GPC1	PFKP	0.367314	2.17128e-13		990	EPHX3	0.177018	0.000583624
991	GPC1	IDI1	-0.153708	0.00287917		991	SYDE1	0.384632	1.23645e-14
992	GPC1	SP100	0.228096	8.37883e-06		992	GPI	0.18242	0.000391396
993	GPC1	KLF6	0.127338	0.0137242		993	PLD3	0.174844	0.000683286
994	GPC1	PLPP1	-0.0663374	0.200538		994	PRX	0.177843	0.000549505
995	GPC1	NEO1	0.30646	1.42107e-09		995	NUMBL	0.344942	6.8759e-12
996	GPC1	TRAM1	-0.0145505	0.77912		996	CLIP3	0.309434	9.66405e-10
997	GPC1	PHKA1	0.169226	0.00101823		997	SLC1A5	0.292807	7.89747e-09
998	GPC1	TNFRSF1A	0.270643	1.0607e-07		998	PRKD2	0.181103	0.000431899
999	GPC1	CACNB1	0.377669	3.99437e-14		999	TJP3	0.24113	2.38863e-06
1000	GPC1	EVI5	0.0129001	0.803631		1000	APLP1	0.298102	4.10433e-09
1001	GPC1	STOML1	0.117128	0.0234895		1001	FZR1	0.190998	0.000202696
1002	GPC1	PKM	0.386036	9.72756e-15		1002	TGFB1	0.235338	4.20952e-06
1003	GPC1	DHX29	0.0967834	0.0615076		1003	DENND3	0.393842	2.50956e-15
1004	GPC1	DNTTIP2	0.0622208	0.229973		1004	CEACAM4	0.176377	0.000611528
1005	GPC1	METTL22	0.208881	4.68047e-05		1005	PLIN3	0.257289	4.5529e-07
1006	GPC1	TP53BP1	0.24172	2.25278e-06		1006	SIGLEC8	0.270343	1.09696e-07
1007	GPC1	TRO	-0.0523005	0.313096		1007	NOP53	-0.19332	0.000168783
1008	GPC1	RRP15	-0.0268332	0.604957		1008	ICAM5	0.181133	0.000430916
1009	GPC1	RHOA	0.108852	0.0353524		1009	ETFB	-0.220966	1.61496e-05
1010	GPC1	DHX8	0.0881117	0.0888293		1010	TYK2	0.187239	0.000271418
1011	GPC1	PRKCZ	0.117928	0.0225514		1011	SULT2A1	-0.205759	6.10161e-05
1012	GPC1	ZFY	0.0162917	0.753497		1012	ATP1A3	0.179519	0.000485768
1013	GPC1	IARS2	-0.0260985	0.614882		1013	MEIS3	0.403669	4.32996e-16
1014	GPC1	SYT1	0.0696171	0.179125		1014	PTPRS	0.310945	7.9322e-10
1015	GPC1	NAV3	0.0157874	0.760891		1015	CNFN	0.215585	2.61314e-05
1016	GPC1	IDH3G	0.235852	4.00527e-06		1016	CYTH2	0.247733	1.23024e-06
1017	GPC1	ROGDI	0.168427	0.00107658		1017	GRIN2D	0.206313	5.82299e-05
1018	GPC1	PDZD4	0.358597	8.61939e-13		1018	SYNGR4	0.180409	0.000454758
1019	GPC1	ATP2B3	0.0326943	0.528479		1019	CLEC11A	0.435567	9.52221e-19
1020	GPC1	ROCK1	0.159588	0.00196266		1020	HAS1	0.21052	4.06572e-05
1021	GPC1	CBFB	0.185241	0.00031625		1021	PLEKHA4	0.199836	9.98244e-05
1022	GPC1	PDK3	0.267448	1.51399e-07		1022	CACNG7	0.188696	0.000242546
1023	GPC1	HYAL2	0.191195	0.000199594		1023	GCDH	-0.22347	1.28572e-05
1024	GPC1	HDAC4	0.149684	0.00371462		1024	DNASE2	0.245771	1.50124e-06
1025	GPC1	RASSF1	0.157399	0.002267		1025	JAK3	0.178789	0.000512604
1026	GPC1	FGFR3	-0.023925	0.644652		1026	ARRDC2	0.47147	4.28261e-22
1027	GPC1	IFI35	0.063973	0.21709		1027	ISYNA1	0.221812	1.49565e-05
1028	GPC1	HEATR6	0.103278	0.0459383		1028	CRTC1	0.179738	0.000477953
1029	GPC1	COASY	-0.119486	0.0208167		1029	COMP	0.288124	1.39355e-08
1030	GPC1	PLEKHH3	0.339539	1.52145e-11		1030	HPN	-0.21738	2.22845e-05
1031	GPC1	MEF2A	0.188223	0.000251578		1031	PBX4	0.17251	0.000807612
1032	GPC1	OTUD5	0.128753	0.0127024		1032	ERF	-0.229903	7.07089e-06
1033	GPC1	TFE3	0.258221	4.12353e-07		1033	ATP13A1	0.230832	6.47677e-06
1034	GPC1	TBC1D25	0.210784	3.97427e-05		1034	SIPA1L3	0.186096	0.000296264
1035	GPC1	ACSL4	-0.0918861	0.0759307		1035	CADM4	0.322534	1.67916e-10
1036	GPC1	INPP5A	-0.0265068	0.609357		1036	SMG9	0.177502	0.000563393
1037	GPC1	GPKOW	0.114151	0.0272858		1037	CDK6	-0.190685	0.000207727
1038	GPC1	GRIPAP1	0.132713	0.0101895		1038	PMPCB	-0.186331	0.000291001
1039	GPC1	FTSJ1	0.244754	1.6635e-06		1039	NAMPT	0.266606	1.66174e-07
1040	GPC1	PRR11	0.139282	0.00698124		1040	PON3	-0.212466	3.43478e-05
1041	GPC1	REEP1	0.214017	2.99955e-05		1041	ITGB8	0.267995	1.42509e-07
1042	GPC1	ATP11A	0.148499	0.00399961		1042	WDR91	0.220558	1.6756e-05
1043	GPC1	POLR1A	0.0608364	0.240527		1043	PTN	0.274849	6.59288e-08
1044	GPC1	LAPTM4A	0.0638564	0.217931		1044	ADAP1	0.231275	6.21069e-06
1045	GPC1	TTC7A	0.304498	1.82828e-09		1045	TFEC	0.203625	7.29741e-05
1046	GPC1	IP6K2	0.0638951	0.217652		1046	CAV2	0.433313	1.49965e-18
1047	GPC1	STON1-GTF2A1L	0.129599	0.0121235		1047	CAV1	0.369455	1.53763e-13
1048	GPC1	SRBD1	0.195488	0.000141992		1048	WNT2	0.192104	0.000185828
1049	GPC1	KIF2A	0.13861	0.00726207		1049	HOXA3	-0.22001	1.76064e-05
1050	GPC1	RASGRP2	0.0500399	0.334499		1050	LFNG	0.195263	0.000144576
1051	GPC1	PSME4	0.128633	0.0127863		1051	IQCE	0.357403	1.03774e-12
1052	GPC1	IFT80	0.269135	1.25541e-07		1052	HIBADH	-0.188648	0.000243448
1053	GPC1	SIRT2	0.0724203	0.162206		1053	CHN2	-0.341413	1.15718e-11
1054	GPC1	ERLEC1	0.0261524	0.614152		1054	GRB10	0.200471	9.47542e-05
1055	GPC1	PPP2R5B	0.268952	1.28124e-07		1055	ABHD11	0.326344	9.93174e-11
1056	GPC1	PYGM	0.16761	0.00113945		1056	STX1A	0.273724	7.49358e-08
1057	GPC1	PAGE1	-0.0197325	0.703672		1057	NOD1	0.367731	2.03044e-13
1058	GPC1	PITX1	0.194191	0.0001575		1058	EPHB6	0.370217	1.35899e-13
1059	GPC1	TRPC7	0.213881	3.03562e-05		1059	MINDY4	0.233626	4.9632e-06
1060	GPC1	MAST4	0.16866	0.00105925		1060	GHRHR	0.184281	0.00034015
1061	GPC1	ADGRF5	0.15089	0.00344389		1061	CASP2	0.206406	5.77721e-05
1062	GPC1	SDK2	0.135841	0.00852708		1062	NPTX2	0.281726	2.97763e-08
1063	GPC1	ADAM7	0.0130599	0.801249		1063	PTPRZ1	0.218441	2.02702e-05
1064	GPC1	NUP133	-0.0605525	0.242734		1064	PCOLCE	0.217086	2.28756e-05
1065	GPC1	NUCKS1	-0.0212304	0.682358		1065	IMPDH1	0.34835	4.133e-12
1066	GPC1	VPS35	0.145247	0.00488568		1066	AGFG2	-0.250306	9.45056e-07
1067	GPC1	DNAJA2	0.0449779	0.385746		1067	SERPINE1	0.212764	3.34689e-05
1068	GPC1	BCL3	0.276873	5.22935e-08		1068	PLOD3	0.285609	1.88249e-08
1069	GPC1	KCNAB2	0.283575	2.39573e-08		1069	CEP41	0.279487	3.86636e-08
1070	GPC1	ABCC9	-0.107692	0.0373646		1070	ZNF862	0.17528	0.000662115
1071	GPC1	GAL	0.11219	0.0300648		1071	SFRP4	0.29283	7.87581e-09
1072	GPC1	CLEC2D	0.0419698	0.418344		1072	CHCHD3	0.182046	0.000402516
1073	GPC1	FUNDC1	0.24504	1.61621e-06		1073	GLI3	0.363379	4.06688e-13
1074	GPC1	MAOB	-0.0348585	0.501533		1074	COA1	0.183188	0.000369433
1075	GPC1	RORA	-0.0354469	0.494335		1075	BLVRA	0.280633	3.38349e-08
1076	GPC1	DRD4	0.0847544	0.101728		1076	URGCP	0.238494	3.09691e-06
1077	GPC1	TGFBR3	-0.0482322	0.352275		1077	PRKAG2	0.188042	0.000255122
1078	GPC1	PLA2G10	0.154174	0.00279436		1078	AEBP1	0.34723	4.88894e-12
1079	GPC1	HES2	0.279835	3.71291e-08		1079	YKT6	0.308116	1.14715e-09
1080	GPC1	ATP1B3	0.244741	1.66557e-06		1080	CLIP2	0.387423	7.66629e-15
1081	GPC1	NEDD4	-0.110172	0.033173		1081	LIMK1	0.31011	8.84769e-10
1082	GPC1	PIGB	0.173358	0.000760199		1082	SPATA6L	0.241531	2.29554e-06
1083	GPC1	MAPK6	-0.0893596	0.0843829		1083	SLC1A1	0.226741	9.50727e-06
1084	GPC1	GNB5	0.254713	5.9757e-07		1084	LHX2	0.247552	1.25315e-06
1085	GPC1	RAB27A	0.240733	2.48445e-06		1085	FSD1L	0.183881	0.000350618
1086	GPC1	HDHD5	0.105722	0.0410085		1086	SPIN1	0.204878	6.57081e-05
1087	GPC1	UFD1	0.0563218	0.277289		1087	TGFBR1	0.209932	4.27704e-05
1088	GPC1	LRP6	0.000670896	0.989683		1088	OGN	0.222026	1.46687e-05
1089	GPC1	GUCY2C	-0.0185143	0.72118		1089	ASPN	0.352805	2.10544e-12
1090	GPC1	SCT	0.0916265	0.0767663		1090	TLE4	0.170205	0.000950687
1091	GPC1	PHRF1	0.162621	0.00160256		1091	LHX6	0.198614	0.0001103
1092	GPC1	ELP1	-0.226824	9.43401e-06		1092	AMBP	-0.306998	1.32574e-09
1093	GPC1	NUCB2	0.150791	0.00346532		1093	TNFSF8	0.175109	0.000670344
1094	GPC1	PFN2	0.154906	0.00266579		1094	DNM1	0.253152	7.03622e-07
1095	GPC1	PTPN3	0.0342161	0.509456		1095	ENG	0.260549	3.21398e-07
1096	GPC1	SPTB	0.244008	1.79287e-06		1096	AK1	0.180459	0.000453091
1097	GPC1	DAPP1	0.108628	0.0357339		1097	PLGRKT	0.220465	1.68981e-05
1098	GPC1	FGF10	0.108958	0.0351726		1098	NCS1	0.419791	2.13061e-17
1099	GPC1	SLC44A1	0.0862055	0.0959817		1099	TESK1	0.226484	9.73675e-06
1100	GPC1	TMEM260	0.0504205	0.330832		1100	CREB3	0.286675	1.65784e-08
1101	GPC1	SMG6	0.126583	0.0142992		1101	GLIS3	0.369651	1.48966e-13
1102	GPC1	EXOC5	0.226115	1.00762e-05		1102	NPDC1	0.33204	4.46738e-11
1103	GPC1	CLTCL1	0.0730387	0.158641		1103	SH3GL2	0.17257	0.000804196
1104	GPC1	FGF22	0.0285276	0.582345		1104	PTGDS	0.281616	3.01603e-08
1105	GPC1	FSTL3	0.413148	7.51642e-17		1105	ABCA2	0.359905	7.02732e-13
1106	GPC1	DGCR2	0.209682	4.36992e-05		1106	PDLIM1	-0.193038	0.00017261
1107	GPC1	RNF126	-0.0226266	0.662715		1107	GATA3	0.216004	2.51808e-05
1108	GPC1	MNT	0.239191	2.89228e-06		1108	ERLIN1	-0.418815	2.5689e-17
1109	GPC1	ZXDC	0.0557704	0.282028		1109	PKD2L1	-0.223278	1.30842e-05
1110	GPC1	JMJD6	0.0843997	0.103174		1110	TRDMT1	0.270401	1.08993e-07
1111	GPC1	POLB	-0.186968	0.000277121		1111	NSMCE4A	-0.202385	8.09025e-05
1112	GPC1	ST6GALNAC1	0.138065	0.00749702		1112	PALD1	0.408251	1.87026e-16
1113	GPC1	WIPI1	0.0603664	0.244187		1113	UNC5B	0.396695	1.51598e-15
1114	GPC1	FRMPD1	0.191296	0.00019802		1114	VSIR	0.308874	1.03954e-09
1115	GPC1	GBA2	0.0710493	0.170324		1115	MICU1	-0.179105	0.00050082
1116	GPC1	NDST1	0.0479569	0.355033		1116	MINPP1	-0.265059	1.96961e-07
1117	GPC1	ASNS	0.151886	0.00323373		1117	ACTA2	0.218519	2.01297e-05
1118	GPC1	AP3M2	0.261338	2.95218e-07		1118	TLX1	-0.259162	3.72958e-07
1119	GPC1	CNGB1	0.129013	0.0125219		1119	TWNK	-0.172646	0.000799866
1120	GPC1	ST6GALNAC2	0.234927	4.37993e-06		1120	SFXN3	0.363125	4.23385e-13
1121	GPC1	CHAT	0.245261	1.58067e-06		1121	ARHGAP21	0.262479	2.60929e-07
1122	GPC1	PABPC1	-0.0874345	0.0913195		1122	LHPP	-0.234149	4.72042e-06
1123	GPC1	TESK2	-0.102707	0.0471596		1123	LARP4B	0.21229	3.4879e-05
1124	GPC1	CFAP20	0.0600436	0.246723		1124	BCCIP	-0.171725	0.000853948
1125	GPC1	CSNK2A2	-0.0253787	0.624675		1125	PITRM1	0.312926	6.11197e-10
1126	GPC1	PTPN21	0.148428	0.0040173		1126	TASOR2	0.2102	4.17952e-05
1127	GPC1	EIF2B3	-0.0121878	0.81427		1127	ZMIZ1	0.256317	5.04682e-07
1128	GPC1	CAMK2A	0.0144489	0.780622		1128	DNAJC12	-0.299355	3.50838e-09
1129	GPC1	TCOF1	0.0882106	0.08847		1129	GIT1	0.288393	1.34917e-08
1130	GPC1	CDC42	0.259632	3.54666e-07		1130	UBTF	0.187778	0.000260378
1131	GPC1	OSBPL3	0.20869	4.75753e-05		1131	RGS9	0.17968	0.000479994
1132	GPC1	EPHA8	-0.0221204	0.669811		1132	RNF43	-0.253086	7.08447e-07
1133	GPC1	SLC12A3	0.0428896	0.408209		1133	MTMR4	-0.204037	7.0506e-05
1134	GPC1	RAD18	0.110533	0.0325977		1134	GALK1	-0.211918	3.6025e-05
1135	GPC1	ATP2B1	-0.0559844	0.280182		1135	CAMTA2	0.221963	1.47521e-05
1136	GPC1	TRPM5	0.0347847	0.50244		1136	HOXB6	0.27156	9.56884e-08
1137	GPC1	NCK2	0.315218	4.50933e-10		1137	RASD1	0.248642	1.12118e-06
1138	GPC1	MAP4K4	0.103439	0.0455983		1138	RAI1	0.247974	1.20028e-06
1139	GPC1	MGAT4A	0.157911	0.00219218		1139	AKAP10	0.192395	0.00018161
1140	GPC1	RPL31	-0.134951	0.00897389		1140	LGALS3BP	0.318073	3.07639e-10
1141	GPC1	WDR1	0.116092	0.0247558		1141	CCL2	0.267503	1.50491e-07
1142	GPC1	SNX13	0.160005	0.00190912		1142	KRT32	0.178202	0.000535219
1143	GPC1	MS4A12	-0.0645325	0.213088		1143	RAB5C	0.17776	0.00055285
1144	GPC1	ARHGAP10	0.300911	2.88437e-09		1144	ABI3	0.215134	2.71914e-05
1145	GPC1	RPS6KA2	0.276388	5.52929e-08		1145	EZH1	0.223523	1.2794e-05
1146	GPC1	ING3	0.016089	0.756465		1146	DLX4	0.196681	0.000129006
1147	GPC1	VASH1	0.39158	3.73022e-15		1147	PPP1R9B	0.258058	4.1957e-07
1148	GPC1	LMCD1	0.189985	0.000219416		1148	COL1A1	0.416073	4.32939e-17
1149	GPC1	BUD23	0.00708349	0.891401		1149	SGCA	0.296334	5.11422e-09
1150	GPC1	SEL1L	0.0548654	0.289922		1150	RND2	-0.232739	5.40292e-06
1151	GPC1	TRIP13	0.13657	0.00817618		1151	ALOX12	0.178744	0.000514332
1152	GPC1	ATP6AP1	0.0640203	0.21675		1152	ABCC3	0.300701	2.96202e-09
1153	GPC1	TCF3	0.11101	0.0318499		1153	MPP2	0.265594	1.85744e-07
1154	GPC1	TRIB2	-0.00351196	0.946032		1154	DUSP3	0.171815	0.000848485
1155	GPC1	DAZAP1	0.0736179	0.155356		1155	HLF	-0.358036	9.40584e-13
1156	GPC1	MBD3	0.0438897	0.397356		1156	EFNB3	0.356774	1.14396e-12
1157	GPC1	PRLH	0.101354	0.0501628		1157	DHRS7B	0.241357	2.33547e-06
1158	GPC1	HLTF	-0.00896469	0.862815		1158	RCVRN	0.344642	7.18809e-12
1159	GPC1	FAM50A	0.103062	0.0463967		1159	MYH3	-0.223338	1.3013e-05
1160	GPC1	FAM3A	0.0100274	0.846742		1160	VTN	-0.186326	0.000291107
1161	GPC1	CPSF1	0.0708497	0.171531		1161	CDR2L	0.427832	4.46036e-18
1162	GPC1	MYO3B	0.134316	0.00930483		1162	PMP22	0.408293	1.85589e-16
1163	GPC1	CYBRD1	0.259658	3.53678e-07		1163	UNC119	0.239597	2.77912e-06
1164	GPC1	CDH19	0.169907	0.000970794		1164	UGT2B10	-0.171412	0.000873106
1165	GPC1	PDCD2	-0.0750705	0.147343		1165	CWH43	0.18112	0.000431355
1166	GPC1	SLC6A15	0.111628	0.0309048		1166	SULT1E1	-0.33223	4.34888e-11
1167	GPC1	RDH11	-0.101242	0.0504168		1167	ODAM	-0.236745	3.673e-06
1168	GPC1	PRKACA	0.123308	0.0170427		1168	CHIC2	0.244068	1.78214e-06
1169	GPC1	ADGRL1	0.30576	1.55518e-09		1169	NMU	0.215551	2.62102e-05
1170	GPC1	SPP2	-0.162706	0.00159344		1170	CRACD	0.211051	3.88352e-05
1171	GPC1	ACTN1	0.148556	0.00398534		1171	LAMTOR3	0.181573	0.00041702
1172	GPC1	ZFYVE26	0.158857	0.00205995		1172	PF4V1	0.228595	7.99631e-06
1173	GPC1	RPS6KA6	0.112637	0.0294099		1173	NFKB1	0.210495	4.07434e-05
1174	GPC1	EPN2	0.148891	0.00390332		1174	MANBA	0.226274	9.92809e-06
1175	GPC1	PTPN18	0.192903	0.000174459		1175	MAPK10	0.360329	6.57598e-13
1176	GPC1	LIMS2	0.163765	0.0014832		1176	CPE	0.250952	8.84143e-07
1177	GPC1	ASIC4	0.131537	0.0108854		1177	WFS1	0.171271	0.000881857
1178	GPC1	SPEG	0.290921	9.94033e-09		1178	CLCN3	0.178491	0.000524001
1179	GPC1	LNX1	0.0677517	0.191086		1179	GALNT7	0.18738	0.000268491
1180	GPC1	ALDH3A2	-0.145898	0.00469514		1180	SOD3	0.401431	6.49329e-16
1181	GPC1	TFRC	0.237625	3.37129e-06		1181	CPZ	0.286617	1.66934e-08
1182	GPC1	SREBF1	-0.0656986	0.204917		1182	SLC2A9	-0.171787	0.000850215
1183	GPC1	TRPC5	-0.0598405	0.248327		1183	TBC1D19	0.266469	1.68691e-07
1184	GPC1	AFF4	0.0633884	0.221329		1184	STIM2	0.194002	0.000159882
1185	GPC1	UBE2D1	0.0786418	0.128984		1185	MFSD10	0.262153	2.70315e-07
1186	GPC1	MPP5	0.024147	0.641584		1186	FAM149A	0.191408	0.000196281
1187	GPC1	RHOBTB1	-0.202316	8.13709e-05		1187	CRYAB	0.299961	3.25116e-09
1188	GPC1	SMC1A	0.144295	0.00517655		1188	CTSC	0.186776	0.000281245
1189	GPC1	HSD17B10	0.0248978	0.631254		1189	JHY	0.325453	1.12363e-10
1190	GPC1	MARK2	0.294109	6.73191e-09		1190	B3GAT1	0.180757	0.000443157
1191	GPC1	HMMR	0.113237	0.0285528		1191	VWA5A	0.252198	7.77078e-07
1192	GPC1	CHFR	0.0103536	0.841822		1192	SIAE	0.227408	8.93469e-06
1193	GPC1	TRHDE	0.0631396	0.223152		1193	DTX4	0.208996	4.63457e-05
1194	GPC1	P4HA2	0.224489	1.1709e-05		1194	UNC93B1	0.188931	0.000238152
1195	GPC1	FCGR2B	0.230999	6.3751e-06		1195	FOXRED1	-0.208063	5.01893e-05
1196	GPC1	NFATC3	-0.0597765	0.248835		1196	MS4A6A	0.263551	2.32252e-07
1197	GPC1	TRNT1	0.184737	0.00032859		1197	MS4A4A	0.22728	9.0422e-06
1198	GPC1	ACADVL	-0.0195469	0.70633		1198	ST3GAL4	0.247274	1.28903e-06
1199	GPC1	STK10	0.292685	8.01695e-09		1199	TRIM3	0.200456	9.48706e-05
1200	GPC1	FBXW11	0.241219	2.36776e-06		1200	FOLR1	0.199244	0.000104775
1201	GPC1	ACAP1	0.0899186	0.0824505		1201	ARHGEF17	0.359682	7.27636e-13
1202	GPC1	CRMP1	0.338093	1.87694e-11		1202	APOC3	-0.190012	0.00021895
1203	GPC1	EVC	0.281491	3.06061e-08		1203	RNF141	0.187638	0.000263201
1204	GPC1	DERL2	0.0278106	0.591865		1204	GALNT18	0.484375	2.13178e-23
1205	GPC1	SIDT1	0.105813	0.040834		1205	UPK2	0.222257	1.4363e-05
1206	GPC1	NDE1	0.283978	2.28426e-08		1206	CBL	0.254248	6.27429e-07
1207	GPC1	IRAG1	0.290801	1.00862e-08		1207	NECTIN1	0.286145	1.76617e-08
1208	GPC1	TMEM38A	0.0768956	0.137726		1208	KIAA1549L	0.319002	2.71438e-10
1209	GPC1	AP1M1	0.0186799	0.718792		1209	FBXO3	0.184062	0.000345833
1210	GPC1	PVR	0.044041	0.395729		1210	SLC1A2	-0.326595	9.59151e-11
1211	GPC1	XRCC1	0.074393	0.15104		1211	SLC15A3	0.2533	6.92803e-07
1212	GPC1	SCARB1	-0.201156	8.95583e-05		1212	CARS1	0.266477	1.6855e-07
1213	GPC1	CYP2W1	0.0150904	0.771148		1213	CD81	0.333383	3.69182e-11
1214	GPC1	MCM2	0.132211	0.0104813		1214	SLC35F2	0.341414	1.15697e-11
1215	GPC1	MOV10L1	-0.0348817	0.501248		1215	PITPNM1	0.388657	6.19652e-15
1216	GPC1	PANX2	0.118357	0.022062		1216	TCIRG1	0.190995	0.000202754
1217	GPC1	SELENOO	-0.0696795	0.178735		1217	CHKA	-0.19072	0.000207166
1218	GPC1	TP63	-0.0556223	0.28331		1218	PTPN5	0.192295	0.000183039
1219	GPC1	ALPK1	0.244344	1.73341e-06		1219	PSMD9	0.21143	3.75805e-05
1220	GPC1	LLGL2	0.0763498	0.14055		1220	P3H3	0.346577	5.39066e-12
1221	GPC1	PDE8A	0.211648	3.6878e-05		1221	PPFIBP1	0.277059	5.11883e-08
1222	GPC1	CLCN4	0.110475	0.0326898		1222	PRPF40B	0.22429	1.19244e-05
1223	GPC1	NLE1	-0.0655534	0.205922		1223	PRDM4	0.201738	8.53588e-05
1224	GPC1	SDHA	0.121102	0.0191403		1224	CLEC2B	0.230983	6.38479e-06
1225	GPC1	SMARCE1	0.031731	0.540704		1225	COQ5	-0.287725	1.46192e-08
1226	GPC1	FNDC8	0.0285759	0.581706		1226	SELPLG	0.186807	0.000280562
1227	GPC1	GSDMB	-0.0813704	0.11619		1227	TSPAN11	0.314248	5.1306e-10
1228	GPC1	KDM5A	0.0331997	0.522122		1228	KCTD10	0.28576	1.84898e-08
1229	GPC1	ADAM11	0.0586805	0.257633		1229	CSRNP2	0.235603	4.10304e-06
1230	GPC1	PPP2R3A	0.306349	1.44152e-09		1230	LIN7A	-0.290679	1.02367e-08
1231	GPC1	FERMT2	-0.0740486	0.152947		1231	ACSS3	-0.265377	1.90227e-07
1232	GPC1	ABCB11	-0.0713828	0.168322		1232	GLI1	0.382193	1.87054e-14
1233	GPC1	DHRS9	0.026228	0.613127		1233	PPM1H	0.170344	0.000941409
1234	GPC1	CD5L	-0.21125	3.81716e-05		1234	ELK3	0.29588	5.4102e-09
1235	GPC1	PTGS2	0.182865	0.000378538		1235	SLC6A12	-0.347993	4.3607e-12
1236	GPC1	IGF2BP2	-0.0407188	0.432363		1236	TRPV4	0.233526	5.01104e-06
1237	GPC1	MAP3K13	0.143314	0.00549272		1237	PRMT8	0.254747	5.95428e-07
1238	GPC1	ST6GAL1	-0.0634194	0.221103		1238	PARP11	0.190337	0.000213459
1239	GPC1	TBX21	-0.0322357	0.534281		1239	SH2B3	0.316647	3.72604e-10
1240	GPC1	FRY	0.0890194	0.0855769		1240	KCNA1	0.247242	1.29323e-06
1241	GPC1	PICALM	0.195611	0.0001406		1241	SCNN1A	0.269033	1.26975e-07
1242	GPC1	NSF	0.0653535	0.207311		1242	CDK2AP1	0.233301	5.12024e-06
1243	GPC1	GLI2	0.235843	4.00886e-06		1243	MGP	0.385254	1.11189e-14
1244	GPC1	CLASP1	0.192786	0.000176081		1244	RASAL1	0.370651	1.26659e-13
1245	GPC1	MRPS34	0.151297	0.00335638		1245	ARHGDIB	0.178411	0.000527062
1246	GPC1	NOTCH3	0.289246	1.21744e-08		1246	SLC38A1	0.266087	1.75934e-07
1247	GPC1	CLNS1A	-0.20395	7.10223e-05		1247	RERGL	0.177861	0.000548768
1248	GPC1	PPP2R2C	0.324897	1.21332e-10		1248	C12orf49	0.215979	2.52352e-05
1249	GPC1	TEAD2	0.277119	5.08365e-08		1249	VDR	0.26398	2.21628e-07
1250	GPC1	EED	0.139784	0.00677838		1250	STX2	0.419699	2.16853e-17
1251	GPC1	CDHR2	-0.0034458	0.947047		1251	MDM1	0.189379	0.000230018
1252	GPC1	SNCB	0.169089	0.00102801		1252	CNOT2	0.172753	0.000793793
1253	GPC1	TSG101	-0.0565448	0.275389		1253	CHD4	0.22088	1.62759e-05
1254	GPC1	NCBP3	0.134615	0.00914775		1254	GNB3	0.215587	2.61253e-05
1255	GPC1	ATP2A3	0.246046	1.46013e-06		1255	CHPT1	-0.18993	0.000220356
1256	GPC1	CA12	0.188592	0.000244507		1256	GNPTAB	0.308609	1.07603e-09
1257	GPC1	MGLL	0.363601	3.9259e-13		1257	ENO2	0.203757	7.21764e-05
1258	GPC1	NTN4	0.104817	0.0427785		1258	ATN1	0.27492	6.5401e-08
1259	GPC1	BCS1L	0.143636	0.00538689		1259	C12orf57	0.179743	0.000477775
1260	GPC1	NUAK1	0.205891	6.0343e-05		1260	SLCO1B3	-0.271757	9.35893e-08
1261	GPC1	DPP8	0.117419	0.0231444		1261	SUDS3	0.176229	0.000618151
1262	GPC1	SLC24A1	0.118413	0.0219979		1262	CLEC4A	0.220254	1.72224e-05
1263	GPC1	ZNF532	0.346727	5.27062e-12		1263	RAB35	0.259951	3.42711e-07
1264	GPC1	SCARF1	0.20548	6.24686e-05		1264	PHC1	0.230397	6.7491e-06
1265	GPC1	LMAN1	0.0137248	0.791356		1265	RIC8B	0.289838	1.13339e-08
1266	GPC1	HACD3	-0.0168029	0.746023		1266	COL12A1	0.336477	2.37045e-11
1267	GPC1	IPCEF1	0.0444394	0.391465		1267	BTN3A3	0.173529	0.000750961
1268	GPC1	ZZEF1	0.184092	0.000345073		1268	DSE	0.34315	8.96257e-12
1269	GPC1	NOX3	-0.00245531	0.962254		1269	ADTRP	0.239588	2.78151e-06
1270	GPC1	ENO1	0.167172	0.00117451		1270	HDDC2	0.19171	0.000191686
1271	GPC1	SLC12A1	-0.15917	0.00201771		1271	NCOA7	0.283844	2.32072e-08
1272	GPC1	MYDGF	0.0559705	0.280302		1272	SASH1	0.222616	1.39007e-05
1273	GPC1	ANO8	0.23077	6.51496e-06		1273	ULBP1	0.246749	1.35971e-06
1274	GPC1	TUBE1	0.0247487	0.633299		1274	PPARD	0.245828	1.49265e-06
1275	GPC1	ARHGEF10L	0.137185	0.00789054		1275	PHACTR1	0.207139	5.42935e-05
1276	GPC1	TXK	-0.0138596	0.789356		1276	BMP5	0.307635	1.22086e-09
1277	GPC1	WSCD2	0.061584	0.234786		1277	RAB23	0.227352	8.98125e-06
1278	GPC1	KCNQ2	0.198293	0.00011322		1278	GPR63	0.283571	2.39688e-08
1279	GPC1	TACR2	0.0453401	0.381927		1279	E2F3	0.192145	0.000185223
1280	GPC1	ACTR6	-0.023856	0.645606		1280	BVES	0.209995	4.25369e-05
1281	GPC1	TIPIN	0.212213	3.51138e-05		1281	ALDH5A1	-0.17783	0.000550034
1282	GPC1	SRI	0.220541	1.67831e-05		1282	ACOT13	-0.262418	2.62665e-07
1283	GPC1	EIF4G3	0.233499	5.02427e-06		1283	SLC17A2	-0.390712	4.33898e-15
1284	GPC1	NUP37	-0.0434973	0.401593		1284	SLC16A10	-0.2137	3.08418e-05
1285	GPC1	SEMA3A	0.138071	0.00749414		1285	HECA	0.179479	0.000487198
1286	GPC1	GTSE1	0.145498	0.0048115		1286	UNC93A	-0.187344	0.000269221
1287	GPC1	SEMA3C	0.309	1.02269e-09		1287	PACRG	-0.257434	4.48342e-07
1288	GPC1	TTC38	-0.197703	0.000118774		1288	C6orf118	0.259126	3.7438e-07
1289	GPC1	ACAT1	-0.0143566	0.781988		1289	PDE10A	0.183639	0.000357087
1290	GPC1	GRAMD4	0.220678	1.6576e-05		1290	MDFI	0.23257	5.49049e-06
1291	GPC1	CELSR1	0.223012	1.34063e-05		1291	TFEB	0.203824	7.17733e-05
1292	GPC1	WNT8B	-0.00956363	0.853749		1292	SMOC2	0.246219	1.43476e-06
1293	GPC1	ZNF638	0.113001	0.0288867		1293	CCND3	0.294198	6.65847e-09
1294	GPC1	SLC25A40	0.132247	0.0104606		1294	MRPL2	-0.187365	0.000268791
1295	GPC1	TIMM21	0.184613	0.000331702		1295	DNPH1	-0.189471	0.000228377
1296	GPC1	ADD2	0.284648	2.1101e-08		1296	IMPG1	0.189951	0.000220001
1297	GPC1	FGF4	-0.0236095	0.649023		1297	LAMA4	0.208267	4.93255e-05
1298	GPC1	RASAL2	0.0715006	0.167619		1298	TENT5A	0.183048	0.00037335
1299	GPC1	VPS9D1	0.185897	0.000300808		1299	CLIC5	0.204887	6.56601e-05
1300	GPC1	ZNF37A	0.0628237	0.22548		1300	ENPP5	0.228132	8.35043e-06
1301	GPC1	MARK3	0.238615	3.06032e-06		1301	LY86	0.237225	3.50551e-06
1302	GPC1	SLC25A3	0.0840045	0.104803		1302	PRSS16	0.212605	3.39343e-05
1303	GPC1	FNDC3B	0.0526419	0.309943		1303	MEP1A	-0.26542	1.89323e-07
1304	GPC1	FOSL2	0.315578	4.29817e-10		1304	HARS2	0.183685	0.000355836
1305	GPC1	CACNG5	0.0956838	0.064532		1305	CEP72	0.237761	3.32701e-06
1306	GPC1	CACNG4	-0.0585154	0.258977		1306	SEMA5A	0.37268	9.09937e-14
1307	GPC1	FRYL	0.218179	2.07514e-05		1307	C7	0.232548	5.5022e-06
1308	GPC1	TMEM131	0.197959	0.000116328		1308	TENT4A	0.19383	0.000162091
1309	GPC1	FSCN1	0.366104	2.63582e-13		1309	HMGCS1	-0.17368	0.000742873
1310	GPC1	ACTB	0.244256	1.74876e-06		1310	NME5	0.180168	0.000462981
1311	GPC1	MOCOS	0.122066	0.0181974		1311	PFDN1	0.225468	1.06977e-05
1312	GPC1	PLD1	0.204884	6.56771e-05		1312	HBEGF	0.205359	6.31076e-05
1313	GPC1	ATP12A	0.110213	0.0331081		1313	CDH9	-0.230496	6.68617e-06
1314	GPC1	WDR62	0.1013	0.0502852		1314	TMCO6	-0.293862	6.93995e-09
1315	GPC1	DLG1	0.0930567	0.072255		1315	SPARC	0.306699	1.37795e-09
1316	GPC1	RAB7A	0.111002	0.0318626		1316	HMGCR	-0.208536	4.82039e-05
1317	GPC1	BCAP29	0.189983	0.000219452		1317	FAF2	0.207401	5.3098e-05
1318	GPC1	SEC31B	-0.0793772	0.125433		1318	PCDHB6	0.217171	2.27025e-05
1319	GPC1	SART3	0.13301	0.0100202		1319	PCDHB7	0.247058	1.31764e-06
1320	GPC1	ARHGAP15	0.149518	0.00375348		1320	RNF130	0.225746	1.04265e-05
1321	GPC1	TUBA3D	0.141149	0.00625217		1321	ARSB	-0.180806	0.000441544
1322	GPC1	PAX2	0.0781635	0.131335		1322	CLINT1	0.190862	0.000204881
1323	GPC1	EXOSC7	-0.119723	0.0205625		1323	THBS4	-0.230764	6.5188e-06
1324	GPC1	KIFAP3	0.180021	0.000468057		1324	CDH6	0.296919	4.75589e-09
1325	GPC1	MKRN2	0.0364618	0.482049		1325	NPR3	0.296105	5.26188e-09
1326	GPC1	MCM6	0.151541	0.00330506		1326	LNPEP	0.185768	0.000303791
1327	GPC1	REXO2	0.168249	0.00109		1327	PRLR	-0.269885	1.15463e-07
1328	GPC1	RBM7	0.118291	0.0221359		1328	ST8SIA4	0.261827	2.80009e-07
1329	GPC1	RBMS2	0.357196	1.07152e-12		1329	PCDH12	0.24182	2.23058e-06
1330	GPC1	BAZ2A	0.13763	0.00768925		1330	FGF1	0.253974	6.45685e-07
1331	GPC1	PTPN23	0.0309699	0.550462		1331	WWC1	0.282787	2.62884e-08
1332	GPC1	MLH1	0.111817	0.0306193		1332	MACROH2A1	0.284482	2.15196e-08
1333	GPC1	UNG	-0.0154654	0.765625		1333	DPYSL3	0.357801	9.75432e-13
1334	GPC1	FMO4	-0.049916	0.335699		1334	HMGXB3	0.255924	5.26053e-07
1335	GPC1	KLHL20	0.201894	8.42669e-05		1335	ERGIC1	0.208782	4.72003e-05
1336	GPC1	RGS11	0.279734	3.75712e-08		1336	PDGFRB	0.179538	0.000485076
1337	GPC1	SLC46A1	-0.0294645	0.570013		1337	CDX1	0.176371	0.000611785
1338	GPC1	PLXNA2	0.102949	0.0466392		1338	BNIP1	0.184635	0.000331152
1339	GPC1	SPAG5	0.106415	0.0396928		1339	STC2	0.308381	1.10842e-09
1340	GPC1	ANKRD13A	0.15827	0.00214117		1340	HRH2	0.185373	0.000313075
1341	GPC1	TPD52	0.127392	0.013684		1341	DBN1	0.245126	1.6023e-06
1342	GPC1	ACACB	0.133589	0.00969745		1342	UNC5A	0.186003	0.000298382
1343	GPC1	TRAF4	0.0556811	0.2828		1343	EHHADH	-0.183679	0.000356006
1344	GPC1	PAG1	0.153532	0.00291185		1344	CNTN3	0.253638	6.68787e-07
1345	GPC1	GPATCH1	-0.0705495	0.173358		1345	SMC4	0.180153	0.000463474
1346	GPC1	ICAM3	0.0673372	0.193822		1346	KNG1	-0.233778	4.89134e-06
1347	GPC1	NT5C2	0.0173863	0.737523		1347	ARL6	0.265782	1.81938e-07
1348	GPC1	MCAM	0.252048	7.89251e-07		1348	CD86	0.191862	0.000189407
1349	GPC1	GPC4	0.303522	2.0712e-09		1349	AMOTL2	0.222752	1.37291e-05
1350	GPC1	MBNL3	-0.377662	3.9992e-14		1350	FAM162A	-0.175923	0.000632014
1351	GPC1	CAMSAP3	-0.126645	0.0142513		1351	RBP2	-0.251152	8.66e-07
1352	GPC1	RAP1GAP	0.31021	8.73268e-10		1352	SLC25A36	0.204967	6.52196e-05
1353	GPC1	XAB2	0.0351846	0.497538		1353	GRK7	0.190576	0.000209518
1354	GPC1	ARHGEF1	0.125185	0.0154183		1354	PDCD10	0.179661	0.000480667
1355	GPC1	STXBP2	0.249969	9.78442e-07		1355	HES1	0.23201	5.79156e-06
1356	GPC1	MAP2K7	0.0698572	0.177626		1356	USP4	0.201513	8.69614e-05
1357	GPC1	NMRK2	0.0836486	0.106288		1357	ACAP2	0.181292	0.00042586
1358	GPC1	DGKD	0.137845	0.00759364		1358	ECT2	0.206959	5.51311e-05
1359	GPC1	CTTNBP2	0.225819	1.03563e-05		1359	GNAI2	0.20595	6.00413e-05
1360	GPC1	ACTL6B	-0.0602077	0.245432		1360	HYAL1	-0.233612	4.9698e-06
1361	GPC1	RARB	0.283463	2.42754e-08		1361	CBLB	0.257283	4.55587e-07
1362	GPC1	TOP2B	0.0877355	0.0902059		1362	IFT57	0.342362	1.00666e-11
1363	GPC1	TM9SF3	-0.00982192	0.849845		1363	GNB4	0.314225	5.14619e-10
1364	GPC1	NFKB2	0.203962	7.09531e-05		1364	IQCG	0.236914	3.61333e-06
1365	GPC1	UBE2T	0.0930076	0.0724061		1365	C3orf52	0.30185	2.56134e-09
1366	GPC1	PPP1R12B	0.234217	4.68953e-06		1366	PLXNA1	0.310128	8.8276e-10
1367	GPC1	DNAJC10	0.202536	7.98995e-05		1367	ABTB1	0.278714	4.22897e-08
1368	GPC1	GTF3C1	0.306518	1.41043e-09		1368	KLHL18	0.245734	1.50695e-06
1369	GPC1	IL4R	0.342273	1.01989e-11		1369	EFCC1	0.277186	5.04446e-08
1370	GPC1	USP33	0.169849	0.00097471		1370	NEK11	0.257627	4.39266e-07
1371	GPC1	PAK3	0.0716688	0.166619		1371	MAPKAPK3	0.194587	0.000152607
1372	GPC1	CAPN6	0.260937	3.08238e-07		1372	PEX5L	0.271137	1.00359e-07
1373	GPC1	DCX	0.142652	0.00571546		1373	ABCC5	0.254776	5.93621e-07
1374	GPC1	SNRPA	0.111201	0.0315551		1374	AADAC	-0.207599	5.22143e-05
1375	GPC1	SPAG6	0.00886811	0.864279		1375	ARHGEF26	0.20839	4.8808e-05
1376	GPC1	EXOSC5	-0.0867669	0.0938292		1376	ZBTB47	0.355449	1.40355e-12
1377	GPC1	DYNC1I2	0.235391	4.18783e-06		1377	TNNC1	-0.18145	0.000420858
1378	GPC1	APBB1IP	0.256086	5.17117e-07		1378	CLCN2	0.253578	6.72997e-07
1379	GPC1	LRCH4	0.172023	0.000836077		1379	SPCS1	-0.199426	0.000103231
1380	GPC1	FAM76B	0.167552	0.00114403		1380	SLC4A3	0.350555	2.96407e-12
1381	GPC1	SIRT6	0.191397	0.000196461		1381	EEF1B2	-0.178761	0.000513684
1382	GPC1	TYR	0.0275958	0.594732		1382	MOB1A	0.194573	0.000152773
1383	GPC1	POLD3	0.276298	5.58659e-08		1383	TTL	0.178596	0.000519938
1384	GPC1	ACTN2	-0.0640482	0.21655		1384	KCNIP3	0.330616	5.46383e-11
1385	GPC1	CAPZB	0.177138	0.000578572		1385	FAHD2A	0.206569	5.69796e-05
1386	GPC1	GPR137B	0.186256	0.000292679		1386	ACTR1B	0.198456	0.000111729
1387	GPC1	NAALAD2	0.0542288	0.295563		1387	ACTR3	0.302014	2.50882e-09
1388	GPC1	JADE1	0.222757	1.37233e-05		1388	TFCP2L1	0.224346	1.18632e-05
1389	GPC1	SLC25A43	0.223033	1.33814e-05		1389	DNAJC27	0.249798	9.95793e-07
1390	GPC1	UBE2A	0.193097	0.000171799		1390	GPD2	0.224166	1.20615e-05
1391	GPC1	FGFR1	0.370075	1.39063e-13		1391	TANC1	0.330944	5.21657e-11
1392	GPC1	FKBP6	-0.0725529	0.161437		1392	MPV17	0.21082	3.96179e-05
1393	GPC1	SMC1B	0.095149	0.0660468		1393	ITGB6	0.241817	2.23135e-06
1394	GPC1	FBLN1	0.182754	0.00038171		1394	PSMD14	0.231399	6.13794e-06
1395	GPC1	ITGA8	0.253044	7.11573e-07		1395	PDE1A	0.388135	6.78163e-15
1396	GPC1	CST7	0.00149652	0.976989		1396	APC2	0.187535	0.000265293
1397	GPC1	MAP2	0.232922	5.30921e-06		1397	IFIH1	0.217232	2.25807e-05
1398	GPC1	PIAS2	0.160105	0.00189647		1398	GCA	0.198739	0.000109178
1399	GPC1	AMPH	0.343871	8.05788e-12		1399	GRB14	0.182294	0.000395104
1400	GPC1	ARAF	0.236908	3.61524e-06		1400	LOXL3	0.328226	7.64111e-11
1401	GPC1	MCCC1	0.0882488	0.0883317		1401	DOK1	0.379702	2.84477e-14
1402	GPC1	LAMP3	0.163059	0.0015559		1402	GALNT3	0.205681	6.14162e-05
1403	GPC1	FAP	0.419462	2.26962e-17		1403	POLE4	0.218655	1.98857e-05
1404	GPC1	NEBL	0.248499	1.13771e-06		1404	EVA1A	-0.364245	3.54491e-13
1405	GPC1	ACER3	0.333626	3.5661e-11		1405	EFEMP1	0.369666	1.48595e-13
1406	GPC1	UBE2K	-0.0482474	0.352123		1406	GLS	0.347938	4.39722e-12
1407	GPC1	PIK3C3	-0.0017922	0.972444		1407	PAPOLG	0.178508	0.000523311
1408	GPC1	N4BP2	-0.143186	0.00553505		1408	PECR	-0.204051	7.0424e-05
1409	GPC1	TIGAR	0.306985	1.32806e-09		1409	IGFBP5	0.336798	2.26331e-11
1410	GPC1	TULP3	0.183374	0.000364283		1410	TXNDC9	0.196412	0.000131833
1411	GPC1	SYNJ2	0.170667	0.000920213		1411	ST3GAL5	0.234204	4.69535e-06
1412	GPC1	ADCY2	0.126633	0.0142599		1412	PDCL3	0.288133	1.39211e-08
1413	GPC1	PPP2R5C	-0.0160108	0.757612		1413	PLCD4	0.311258	7.61305e-10
1414	GPC1	RBFOX1	1.9469e-05	0.999701		1414	CHMP3	0.342135	1.04076e-11
1415	GPC1	GNB1	0.216253	2.46307e-05		1415	ZNF142	0.263587	2.31335e-07
1416	GPC1	HOXA9	-0.0122068	0.813986		1416	FHL2	0.372677	9.10356e-14
1417	GPC1	EDN1	0.196558	0.000130288		1417	MLPH	0.242612	2.06145e-06
1418	GPC1	MLLT10	0.0589517	0.255436		1418	CNPPD1	0.16997	0.000966487
1419	GPC1	ZCWPW1	0.00742231	0.886241		1419	PPP1R7	0.206131	5.91311e-05
1420	GPC1	ADCYAP1R1	-0.057843	0.264499		1420	PASK	0.218137	2.08305e-05
1421	GPC1	FGF20	-0.0229455	0.65826		1421	TPO	0.173126	0.000772939
1422	GPC1	P2RY10	0.0637242	0.218887		1422	PROC	-0.314331	5.07434e-10
1423	GPC1	ITM2A	0.114925	0.0262519		1423	TAF1B	0.185908	0.000300564
1424	GPC1	NRDC	0.0885553	0.0872275		1424	HPCAL1	0.191977	0.000187687
1425	GPC1	VDAC3	0.0250527	0.629131		1425	ODC1	0.17802	0.000542403
1426	GPC1	PCM1	-0.0763998	0.14029		1426	NOL10	0.203578	7.32604e-05
1427	GPC1	TNRC6C	0.058294	0.260786		1427	PLEKHB2	0.297866	4.22694e-09
1428	GPC1	CBFA2T2	0.110756	0.0322458		1428	STRN	0.20288	7.76477e-05
1429	GPC1	BRINP1	0.184352	0.000338343		1429	RAB3GAP1	0.17171	0.00085485
1430	GPC1	ITCH	-0.0538608	0.298857		1430	SLC25A12	0.195995	0.000136324
1431	GPC1	PKD2L2	0.151188	0.00337963		1431	PLCL1	0.17962	0.000482157
1432	GPC1	TP53INP2	-0.054936	0.289302		1432	WIPF1	0.220618	1.66664e-05
1433	GPC1	SDF4	0.246887	1.34072e-06		1433	RND3	0.235231	4.25317e-06
1434	GPC1	MYH7B	-0.100393	0.052391		1434	AAK1	0.334566	3.11818e-11
1435	GPC1	BPIFB2	-0.0981628	0.0578798		1435	TRAK2	0.239987	2.67419e-06
1436	GPC1	TP73	0.171489	0.000868365		1436	ARID3A	-0.223404	1.29342e-05
1437	GPC1	TOLLIP	-0.0830382	0.108874		1437	CD207	0.211915	3.60327e-05
1438	GPC1	UBE2D4	-0.0093392	0.857144		1438	EPHA4	0.21821	2.06941e-05
1439	GPC1	CLUL1	-0.0208959	0.687096		1439	PARD3B	-0.180352	0.000456698
1440	GPC1	RUNX1T1	0.253047	7.1131e-07		1440	ALMS1	0.215502	2.63234e-05
1441	GPC1	CDH17	0.145828	0.00471544		1441	PRRX1	0.343252	8.82967e-12
1442	GPC1	THOC1	0.0496749	0.338041		1442	MARK1	0.241499	2.30295e-06
1443	GPC1	FKBP7	0.163347	0.00152584		1443	TPSG1	0.284896	2.04905e-08
1444	GPC1	OSBPL6	0.197404	0.00012168		1444	RALGPS2	-0.277151	5.06487e-08
1445	GPC1	SLC1A3	0.0717987	0.16585		1445	ANGPTL1	0.176588	0.000602234
1446	GPC1	XRCC5	0.175531	0.000650234		1446	CEP104	0.186804	0.000280636
1447	GPC1	LXN	0.271801	9.31331e-08		1447	TMEM59	0.177732	0.000553998
1448	GPC1	SP140	0.115255	0.0258205		1448	LRRC42	0.177896	0.000547349
1449	GPC1	MKNK1	0.146518	0.00452019		1449	WRAP73	0.183249	0.000367728
1450	GPC1	TNS1	0.287089	1.57781e-08		1450	ICMT	0.329873	6.06568e-11
1451	GPC1	REXO1	0.0856495	0.0981523		1451	CHD5	0.176011	0.000628013
1452	GPC1	SAR1A	-0.107925	0.0369525		1452	QSOX1	0.2916	9.15134e-09
1453	GPC1	CDC14A	-0.0905892	0.0801794		1453	MECR	0.174133	0.000719137
1454	GPC1	RAPGEF3	0.133755	0.00960642		1454	KCNC4	0.287899	1.43184e-08
1455	GPC1	CEACAM1	-0.166567	0.0012246		1455	S100PBP	0.22693	9.34188e-06
1456	GPC1	SENP1	0.106378	0.039762		1456	RNF19B	0.33464	3.08555e-11
1457	GPC1	DUSP13	-0.0223808	0.666157		1457	TRIM62	0.350485	2.99563e-12
1458	GPC1	CIC	0.119276	0.0210431		1458	GON4L	0.188041	0.000255151
1459	GPC1	LIPE	0.0136602	0.792316		1459	FBXO2	0.234047	4.76699e-06
1460	GPC1	FDFT1	-0.106564	0.0394156		1460	C1orf21	0.195235	0.000144901
1461	GPC1	PAFAH1B3	0.102184	0.0483029		1461	MAD2L2	0.191572	0.000193768
1462	GPC1	OPHN1	0.192348	0.00018228		1462	NCF2	0.29976	3.33442e-09
1463	GPC1	AFM	-0.0260999	0.614863		1463	PLA2G4A	0.227498	8.8599e-06
1464	GPC1	KIF22	0.0733792	0.156703		1464	WLS	0.22652	9.70446e-06
1465	GPC1	SCGN	0.0729381	0.159217		1465	PRDM2	0.323745	1.42202e-10
1466	GPC1	CARMIL1	0.326368	9.89846e-11		1466	RGS2	0.258853	3.85491e-07
1467	GPC1	PGM1	-0.138052	0.00750263		1467	AGMAT	-0.231658	5.98887e-06
1468	GPC1	DDX1	0.0425877	0.411519		1468	OLFML3	0.231808	5.90383e-06
1469	GPC1	DNM2	0.240286	2.59669e-06		1469	PLEKHM2	0.352818	2.10119e-12
1470	GPC1	EPB41L2	0.173438	0.000755864		1470	ZBTB17	0.185533	0.000309291
1471	GPC1	RIMS1	0.117561	0.0229779		1471	CD58	0.391138	4.02893e-15
1472	GPC1	MOXD1	0.39557	1.85054e-15		1472	TTF2	0.170743	0.000915329
1473	GPC1	STX7	0.191225	0.000199127		1473	KIF21B	0.193353	0.000168341
1474	GPC1	RABL2B	0.127164	0.013855		1474	ADPRS	0.22471	1.14723e-05
1475	GPC1	KEAP1	0.0709439	0.170961		1475	MAP7D1	0.422529	1.25682e-17
1476	GPC1	DDX43	0.146448	0.00453974		1476	OSCP1	0.20736	5.32847e-05
1477	GPC1	PTPRH	-0.0167061	0.747437		1477	RRAGC	0.257628	4.39225e-07
1478	GPC1	DCT	-0.0218281	0.673921		1478	HPCAL4	0.179736	0.000478021
1479	GPC1	SLC35C2	-0.0583339	0.260459		1479	BMP8B	0.263204	2.41176e-07
1480	GPC1	CRYBG3	0.21745	2.21469e-05		1480	SIPA1L2	0.244969	1.62783e-06
1481	GPC1	EPHA6	0.188933	0.000238124		1481	RLF	0.181981	0.000404483
1482	GPC1	SCTR	0.251019	8.78015e-07		1482	RIMS3	0.332718	4.05793e-11
1483	GPC1	RFX3	0.201434	8.75269e-05		1483	AKT3	0.31948	2.54435e-10
1484	GPC1	RIF1	0.165902	0.00128194		1484	ETV3	0.262015	2.74371e-07
1485	GPC1	RAB21	0.0732782	0.157276		1485	PADI2	0.264935	1.99667e-07
1486	GPC1	SLC4A4	0.182814	0.000379982		1486	MFAP2	0.250444	9.31688e-07
1487	GPC1	SMARCA2	0.176599	0.000601724		1487	RGS4	0.335649	2.67005e-11
1488	GPC1	RDH8	0.0642747	0.214925		1488	IGSF21	0.228664	7.94488e-06
1489	GPC1	SESN1	-0.00348708	0.946413		1489	KIF17	0.205869	6.04511e-05
1490	GPC1	MID2	0.200435	9.5033e-05		1490	ECE1	0.178667	0.000517228
1491	GPC1	DNAAF6	0.0109339	0.833083		1491	ID3	0.27294	8.18952e-08
1492	GPC1	COL5A3	0.146664	0.00447976		1492	SLC2A1	0.196327	0.000132738
1493	GPC1	SRCAP	0.240672	2.4993e-06		1493	ARTN	0.266125	1.75215e-07
1494	GPC1	PUM3	0.173558	0.000749391		1494	IPO13	0.20622	5.86862e-05
1495	GPC1	CPB2	-0.280995	3.24329e-08		1495	PTCH2	0.187231	0.000271569
1496	GPC1	CHRNA3	0.0242328	0.6404		1496	PIK3R3	0.236944	3.60275e-06
1497	GPC1	KCNN2	0.0637398	0.218775		1497	TSPAN1	0.23789	3.28519e-06
1498	GPC1	CNOT4	0.0431565	0.405296		1498	BLZF1	0.191768	0.000190814
1499	GPC1	PSEN1	0.169308	0.00101241		1499	SLC19A2	-0.232374	5.59424e-06
1500	GPC1	CPOX	0.159434	0.00198277		1500	DR1	0.177538	0.000561912
1501	GPC1	CLDND1	0.238056	3.23253e-06		1501	F3	0.287838	1.44231e-08
1502	GPC1	MOK	0.156991	0.00232835		1502	PTBP2	0.184559	0.000333076
1503	GPC1	HSP90AA1	0.0996431	0.0541856		1503	IRF6	0.192827	0.000175504
1504	GPC1	RBL1	0.186308	0.000291499		1504	SERPINC1	-0.231259	6.22011e-06
1505	GPC1	DLGAP4	0.22414	1.20903e-05		1505	RSRP1	0.212783	3.34126e-05
1506	GPC1	IGSF9B	0.163002	0.00156188		1506	MAN1C1	0.294743	6.22653e-09
1507	GPC1	CFHR2	-0.123631	0.016753		1507	RPS6KA1	0.347661	4.58353e-12
1508	GPC1	NDC80	0.127414	0.0136676		1508	DHDDS	0.258769	3.88962e-07
1509	GPC1	AP4E1	0.0838981	0.105246		1509	STX12	0.23107	6.33237e-06
1510	GPC1	RSBN1	0.0635114	0.220433		1510	OSBPL9	0.258665	3.93291e-07
1511	GPC1	MAGI3	-0.0242181	0.640603		1511	ESYT2	0.192993	0.000173226
1512	GPC1	CXCL2	0.151327	0.00335005		1512	CTSD	0.201843	8.46211e-05
1513	GPC1	AFP	-0.253896	6.50979e-07		1513	APOA1	-0.253759	6.60401e-07
1514	GPC1	COL4A4	0.281562	3.03533e-08		1514	RPS25	-0.194659	0.000151731
1515	GPC1	TCF7	-0.198556	0.000110816		1515	KIF14	0.16998	0.000965839
1516	GPC1	OSTM1	0.207735	5.16106e-05		1516	TNNT2	0.173432	0.000756175
1517	GPC1	CDH7	0.0509185	0.326072		1517	CAMSAP2	0.197144	0.000124265
1518	GPC1	IMPG2	0.135758	0.00856801		1518	NRP2	0.272687	8.42716e-08
1519	GPC1	PCNP	0.133055	0.00999459		1519	CREB1	0.20298	7.70051e-05
1520	GPC1	EXD2	0.213957	3.01547e-05		1520	KLF7	0.269812	1.16412e-07
1521	GPC1	ARG2	-0.070779	0.17196		1521	CA14	-0.223536	1.27795e-05
1522	GPC1	MEF2C	0.214566	2.85856e-05		1522	CASC1	0.202423	8.06537e-05
1523	GPC1	PTPRC	0.12272	0.0175806		1523	USP35	0.189157	0.000234017
1524	GPC1	CACNA1S	0.0623027	0.229359		1524	SGIP1	0.17511	0.000670274
1525	GPC1	PKP1	0.209379	4.48476e-05		1525	FBXO30	0.206231	5.86314e-05
1526	GPC1	UBA5	-0.0199994	0.699857		1526	CCN2	0.208335	4.90393e-05
1527	GPC1	STK17B	0.272956	8.17495e-08		1527	TCF21	0.210238	4.16577e-05
1528	GPC1	CDC14B	-0.135173	0.00886042		1528	ARMC2	0.213486	3.14239e-05
1529	GPC1	ZNF510	0.0464438	0.370436		1529	PKD2	0.292975	7.73714e-09
1530	GPC1	LRP2	-0.0897109	0.0831643		1530	SPP1	0.221961	1.47554e-05
1531	GPC1	ZNF506	0.0739159	0.153686		1531	CCNI	0.242711	2.04133e-06
1532	GPC1	JMJD4	-0.137844	0.00759383		1532	EEF2KMT	0.226489	9.7328e-06
1533	GPC1	DUSP12	0.115581	0.025401		1533	PPL	0.252014	7.91999e-07
1534	GPC1	AACS	0.235401	4.18373e-06		1534	UBN1	0.18603	0.000297764
1535	GPC1	DELE1	0.0871199	0.0924953		1535	KLF12	-0.221825	1.49382e-05
1536	GPC1	SLC13A1	0.101814	0.0491236		1536	PCDH17	0.234035	4.77224e-06
1537	GPC1	CADPS2	0.109083	0.0349612		1537	HS1BP3	0.184398	0.000337162
1538	GPC1	PCDHB4	0.13948	0.00690073		1538	CCND2	0.280649	3.37705e-08
1539	GPC1	PCDHA6	-0.0403089	0.437015		1539	ELL2	-0.229543	7.31524e-06
1540	GPC1	PCDHGA2	-0.0138771	0.789095		1540	DNAH7	0.296973	4.72441e-09
1541	GPC1	HSPB11	0.0156121	0.763467		1541	NDUFB3	0.182527	0.000388245
1542	GPC1	PHLPP1	-0.16199	0.00167202		1542	GDA	0.170657	0.000920884
1543	GPC1	ATP8B1	0.128383	0.0129627		1543	ITGB1BP1	0.213194	3.22352e-05
1544	GPC1	IL12RB2	-0.145297	0.0048708		1544	C1orf198	0.395339	1.92767e-15
1545	GPC1	SMARCD3	0.427098	5.15371e-18		1545	FKBP15	0.18509	0.000319902
1546	GPC1	WDR70	-0.0151001	0.771005		1546	WDR34	0.246002	1.46657e-06
1547	GPC1	FYB1	0.166592	0.00122252		1547	PTPA	0.228773	7.86389e-06
1548	GPC1	MPP4	0.13296	0.0100484		1548	TRIM32	0.194658	0.000151743
1549	GPC1	STRADB	0.015999	0.757785		1549	PHF19	0.246894	1.33989e-06
1550	GPC1	BZW1	0.0964636	0.062375		1550	BSPRY	0.256061	5.18522e-07
1551	GPC1	PGR	0.178569	0.000520987		1551	HDHD3	-0.220912	1.62283e-05
1552	GPC1	C1QTNF3	-0.184961	0.000323052		1552	HSDL2	-0.284688	2.10015e-08
1553	GPC1	ME2	0.205828	6.06599e-05		1553	VPS4B	0.194252	0.000156729
1554	GPC1	C5orf22	0.0861944	0.0960247		1554	ONECUT2	-0.276244	5.62136e-08
1555	GPC1	CCNT2	0.219794	1.7952e-05		1555	DCAF4	0.172194	0.000825978
1556	GPC1	FAM135A	0.148912	0.00389808		1556	PGF	0.284091	2.2539e-08
1557	GPC1	COL19A1	0.0180697	0.727608		1557	IFI27L2	0.2695	1.2054e-07
1558	GPC1	EPB41L3	0.221862	1.48884e-05		1558	ACYP1	0.29922	3.56828e-09
1559	GPC1	COBLL1	-0.239207	2.88768e-06		1559	DNAL1	0.361589	5.39472e-13
1560	GPC1	DLG3	0.312425	6.5295e-10		1560	IRF2BPL	0.178148	0.000537363
1561	GPC1	KCNK2	0.15668	0.00237604		1561	LTBP2	0.342148	1.03876e-11
1562	GPC1	SERTAD4	0.0734664	0.15621		1562	MLH3	0.205157	6.4189e-05
1563	GPC1	TRAF5	0.243472	1.8919e-06		1563	TTLL5	0.189633	0.000225519
1564	GPC1	MRPL22	-0.0343571	0.507711		1564	TGFB3	0.382496	1.77708e-14
1565	GPC1	GEMIN5	0.111069	0.0317594		1565	ALDH6A1	-0.218785	1.96563e-05
1566	GPC1	OPRK1	0.0704249	0.174121		1566	GPR68	0.230232	6.85522e-06
1567	GPC1	NFE2L1	0.17677	0.000594278		1567	EIF2B2	0.171497	0.000867823
1568	GPC1	SEMA5B	0.210736	3.99058e-05		1568	ZNF410	0.213344	3.18181e-05
1569	GPC1	GSK3B	0.171693	0.00085589		1569	RHOQ	0.363123	4.23503e-13
1570	GPC1	ITGB5	0.299869	3.28916e-09		1570	KLHL29	0.395616	1.83539e-15
1571	GPC1	ERC1	0.214417	2.8963e-05		1571	AFTPH	0.260118	3.36635e-07
1572	GPC1	XPO1	0.19085	0.000205066		1572	CNRIP1	0.296375	5.08871e-09
1573	GPC1	RNF13	0.0419009	0.41911		1573	BCL11A	0.25808	4.18603e-07
1574	GPC1	TRPM3	-0.145814	0.00471929		1574	OGFRL1	0.341606	1.12475e-11
1575	GPC1	PALB2	0.115605	0.0253712		1575	TECTB	-0.191219	0.000199214
1576	GPC1	DOP1A	0.125234	0.0153781		1576	IFIT2	0.189741	0.000223622
1577	GPC1	LYRM2	0.0237649	0.646868		1577	GPAM	-0.288372	1.35266e-08
1578	GPC1	BCKDHB	-0.0969741	0.0609954		1578	CUTC	-0.237057	3.56333e-06
1579	GPC1	KAT6A	0.0948237	0.066982		1579	CPN1	-0.405996	2.83175e-16
1580	GPC1	TUT7	-0.0433442	0.403254		1580	SFRP5	0.269438	1.2138e-07
1581	GPC1	ULK2	0.171254	0.000882911		1581	HOXB8	0.211308	3.79817e-05
1582	GPC1	GRHL2	0.172594	0.000802784		1582	HOXB5	0.244729	1.66764e-06
1583	GPC1	TNPO1	0.13941	0.0069292		1583	HOXB3	0.286542	1.68429e-08
1584	GPC1	PLOD1	0.197804	0.000117798		1584	DUSP1	0.183962	0.000348465
1585	GPC1	P2RX5	0.112783	0.0292		1585	MSX2	0.2329	5.32024e-06
1586	GPC1	ITGAE	-0.0752851	0.146187		1586	TEK	0.212206	3.51341e-05
1587	GPC1	DIS3	-0.0407664	0.431825		1587	EQTN	0.199516	0.000102473
1588	GPC1	PIBF1	0.0317073	0.541007		1588	MOB3B	0.360799	6.10829e-13
1589	GPC1	TDRD3	-0.0146073	0.778281		1589	LRP11	0.223422	1.29136e-05
1590	GPC1	NUFIP1	-0.112722	0.0292882		1590	CCDC170	-0.217128	2.27906e-05
1591	GPC1	PDS5B	0.0458622	0.376465		1591	PLEKHG1	0.21044	4.09366e-05
1592	GPC1	OXCT1	0.144598	0.00508244		1592	CXorf21	0.219919	1.77508e-05
1593	GPC1	RRAGB	0.155308	0.00259739		1593	ARAP3	0.294846	6.14828e-09
1594	GPC1	EPYC	0.109458	0.0343363		1594	PCDHB10	0.237145	3.53274e-06
1595	GPC1	CYLD	0.159664	0.00195282		1595	PCDHB14	0.182479	0.00038965
1596	GPC1	SLC27A5	-0.221125	1.5918e-05		1596	PCDHB12	0.221695	1.51167e-05
1597	GPC1	ZNF324	0.0685516	0.185887		1597	CENPL	0.188243	0.000251183
1598	GPC1	ZNF671	0.0748069	0.148773		1598	GORAB	0.276157	5.67724e-08
1599	GPC1	ZNF416	0.027741	0.592794		1599	ACAT2	-0.198329	0.000112883
1600	GPC1	ZNF586	0.0565752	0.275131		1600	SNX19	0.217829	2.14114e-05
1601	GPC1	ZNF446	0.111454	0.0311674		1601	MSANTD2	0.192728	0.000176891
1602	GPC1	ZNF264	0.103636	0.0451858		1602	KIAA1217	0.209959	4.26683e-05
1603	GPC1	RPS5	-0.162021	0.00166855		1603	PLXDC2	0.32715	8.87887e-11
1604	GPC1	FAT1	0.146515	0.00452088		1604	ETF1	0.175894	0.000633353
1605	GPC1	YTHDC1	0.146461	0.00453588		1605	ARL1	0.188166	0.000252693
1606	GPC1	CHMP2B	0.110895	0.0320289		1606	GLT8D2	0.372419	9.49632e-14
1607	GPC1	SMAP2	0.0319461	0.537963		1607	DUSP4	0.1894	0.000229638
1608	GPC1	PPIE	0.163397	0.00152067		1608	EPHX2	-0.224072	1.2166e-05
1609	GPC1	ZMPSTE24	0.208681	4.76131e-05		1609	TNFRSF8	0.181151	0.000430354
1610	GPC1	STARD7	0.0853309	0.0994137		1610	CRISPLD1	0.233064	5.23759e-06
1611	GPC1	NOA1	-0.0179174	0.729813		1611	SCPEP1	0.264021	2.20648e-07
1612	GPC1	REST	0.106461	0.0396078		1612	TBX2	0.181403	0.000422332
1613	GPC1	HAL	0.00828537	0.873119		1613	TBX4	-0.208427	4.86565e-05
1614	GPC1	SSH1	0.263502	2.33478e-07		1614	TEX14	0.185855	0.000301779
1615	GPC1	GSTP1	0.227191	9.11768e-06		1615	FAM117A	-0.220161	1.73679e-05
1616	GPC1	APLP2	0.111043	0.0317995		1616	NCAPH	0.174099	0.000720899
1617	GPC1	FAM234B	0.11324	0.0285473		1617	TRIM6	0.172653	0.000799454
1618	GPC1	SLCO1A2	-0.0127646	0.805652		1618	ADCY7	0.297564	4.38923e-09
1619	GPC1	WBP11	0.0187423	0.717892		1619	CEP89	0.205334	6.32417e-05
1620	GPC1	EIF3I	0.086261	0.095767		1620	TSHZ3	0.395898	1.74591e-15
1621	GPC1	NKAIN1	0.113959	0.0275477		1621	KCNJ8	-0.312963	6.08194e-10
1622	GPC1	COL16A1	0.435785	9.1127e-19		1622	A1BG	-0.273561	7.63352e-08
1623	GPC1	TXLNA	0.209825	4.31634e-05		1623	PDZRN3	0.212678	3.37206e-05
1624	GPC1	APOB	-0.332388	4.25221e-11		1624	RGSL1	-0.178924	0.000507559
1625	GPC1	NCOA1	0.164427	0.00141796		1625	SEC22A	0.209876	4.29739e-05
1626	GPC1	AGBL5	0.0608461	0.240453		1626	MAPK8IP1	0.267275	1.54331e-07
1627	GPC1	EFR3B	0.2587	3.9184e-07		1627	DEPDC7	-0.227128	9.17101e-06
1628	GPC1	KIF3C	0.393864	2.49998e-15		1628	GJB6	-0.213153	3.23508e-05
1629	GPC1	RAB10	0.308732	1.05891e-09		1629	GJA3	0.225901	1.02775e-05
1630	GPC1	GCKR	-0.0367637	0.478426		1630	ADGRB2	0.31169	7.19256e-10
1631	GPC1	HADHA	0.070688	0.172513		1631	ZCCHC17	0.180927	0.000437599
1632	GPC1	MAPRE3	0.368229	1.87414e-13		1632	CCRL2	0.172386	0.000814787
1633	GPC1	CAD	0.0478392	0.356217		1633	POLR3GL	-0.183367	0.000364474
1634	GPC1	CD59	0.399236	9.6356e-16		1634	PIK3CA	0.169733	0.000982721
1635	GPC1	CD82	0.329122	6.74045e-11		1635	TMEM156	0.295998	5.33211e-09
1636	GPC1	BCORL1	0.0210954	0.684269		1636	CPXM2	0.255591	5.4484e-07
1637	GPC1	ATRX	0.119501	0.0207997		1637	TMEM54	0.423762	9.89473e-18
1638	GPC1	AK6	0.0349855	0.499975		1638	ZSCAN20	0.299417	3.48132e-09
1639	GPC1	FCN1	-0.06056	0.242675		1639	CSMD2	0.298299	4.00443e-09
1640	GPC1	MYNN	0.137467	0.00776225		1640	TMIGD3	0.297357	4.50368e-09
1641	GPC1	MECOM	0.276703	5.33298e-08		1641	CLCC1	0.171735	0.000853339
1642	GPC1	SCAMP1	0.00266887	0.958974		1642	GPSM2	0.198068	0.000115305
1643	GPC1	PREP	0.0275047	0.595948		1643	GTDC1	0.267876	1.44402e-07
1644	GPC1	HACE1	0.146846	0.00442986		1644	CXCR4	0.235762	4.04052e-06
1645	GPC1	SEH1L	0.020173	0.697379		1645	UBL3	0.175758	0.000639607
1646	GPC1	WDR47	0.220464	1.69003e-05		1646	XPNPEP2	-0.206227	5.86528e-05
1647	GPC1	WDFY1	0.0861513	0.0961916		1647	PAEP	0.192977	0.000173439
1648	GPC1	OVGP1	-0.299527	3.43346e-09		1648	FMOD	0.364094	3.63067e-13
1649	GPC1	SLC25A24	0.297578	4.38134e-09		1649	PLG	-0.275052	6.44249e-08
1650	GPC1	MAP3K4	0.00830927	0.872756		1650	ZC3H7A	0.18412	0.000344341
1651	GPC1	PILRA	0.199199	0.000105159		1651	ANXA11	0.246727	1.36274e-06
1652	GPC1	IGSF9	0.175755	0.000639743		1652	LDB3	0.220781	1.64222e-05
1653	GPC1	ABCB1	-0.0700953	0.17615		1653	SHLD2	-0.233184	5.17805e-06
1654	GPC1	ZNF213	0.362066	5.00475e-13		1654	PRXL2A	-0.204823	6.6013e-05
1655	GPC1	AKR1B1	0.329017	6.84038e-11		1655	ZNF205	0.244365	1.7297e-06
1656	GPC1	CPNE3	0.0806916	0.119276		1656	RPL5	-0.17146	0.000870149
1657	GPC1	RRN3	0.122487	0.0177988		1657	ODF2L	0.324481	1.28504e-10
1658	GPC1	CTTN	0.217956	2.11688e-05		1658	PTGFR	0.308169	1.13924e-09
1659	GPC1	WNT11	0.102442	0.0477357		1659	ZMIZ2	0.24427	1.74642e-06
1660	GPC1	MTIF2	-0.0720981	0.164088		1660	SEPTIN7	0.223123	1.32717e-05
1661	GPC1	DDHD2	0.09134	0.077697		1661	EEPD1	0.283369	2.45467e-08
1662	GPC1	TTC39A	0.277928	4.63124e-08		1662	WIPF3	0.262288	2.66382e-07
1663	GPC1	EPS15	0.207732	5.1626e-05		1663	FKBP9	0.329661	6.24947e-11
1664	GPC1	ORC1	0.180955	0.000436677		1664	TWIST1	0.292313	8.38946e-09
1665	GPC1	MGST2	-0.274556	6.81671e-08		1665	GLIPR2	0.337046	2.18371e-11
1666	GPC1	CHERP	-0.0449039	0.386529		1666	SLC25A51	0.323495	1.47178e-10
1667	GPC1	ATG16L1	0.18826	0.000250869		1667	RECK	0.225143	1.10239e-05
1668	GPC1	USP40	-0.0283573	0.5846		1668	TRIM24	-0.253872	6.52639e-07
1669	GPC1	POMGNT1	0.232087	5.74947e-06		1669	NUDT10	0.291506	9.25693e-09
1670	GPC1	RAD54L	0.191554	0.000194051		1670	PLAU	0.378734	3.34465e-14
1671	GPC1	MAST2	0.230668	6.5783e-06		1671	CHST3	0.384533	1.25751e-14
1672	GPC1	DNAJA1	-0.0678627	0.190359		1672	BICC1	0.192436	0.000181015
1673	GPC1	B4GALT1	0.140709	0.00641753		1673	EGR2	0.278561	4.30429e-08
1674	GPC1	CHMP5	0.129398	0.0122589		1674	CIT	0.194207	0.0001573
1675	GPC1	NFX1	-0.0330371	0.524162		1675	RASSF8	0.213697	3.08487e-05
1676	GPC1	AQP6	-0.218166	2.07753e-05		1676	BHLHE41	0.334584	3.11007e-11
1677	GPC1	DIMT1	0.0108011	0.83508		1677	SSPN	0.358254	9.09176e-13
1678	GPC1	IPO11	0.0508989	0.326258		1678	ITPR2	-0.249079	1.07213e-06
1679	GPC1	FOLH1	-0.230112	6.93329e-06		1679	ACOT9	0.309164	1.00108e-09
1680	GPC1	EIF2AK1	-0.0755732	0.144645		1680	ADGRE5	0.360567	6.33433e-13
1681	GPC1	NME8	0.225968	1.02144e-05		1681	GIPC1	0.189798	0.000222638
1682	GPC1	EPDR1	0.132888	0.0100896		1682	EBPL	-0.299241	3.55895e-09
1683	GPC1	SNX10	0.0905865	0.0801884		1683	ATP7B	-0.296156	5.22881e-09
1684	GPC1	SEPHS1	0.0818834	0.1139		1684	NLN	0.176889	0.000589165
1685	GPC1	MRPL28	0.104895	0.0426231		1685	OPTN	0.174387	0.000706147
1686	GPC1	HBQ1	0.0128827	0.80389		1686	ITIH5	0.323648	1.4412e-10
1687	GPC1	ITPKC	0.243099	1.9637e-06		1687	MMP19	0.223146	1.32434e-05
1688	GPC1	CEACAM6	0.134343	0.00929067		1688	SPATS2	0.199168	0.000105426
1689	GPC1	FAT2	0.203665	7.27317e-05		1689	PDE1B	0.185055	0.000320756
1690	GPC1	RBM22	0.152906	0.00303068		1690	ATG101	0.282974	2.57148e-08
1691	GPC1	TMED2	0.0370639	0.474839		1691	IKZF4	0.184089	0.000345143
1692	GPC1	ERO1B	0.00617701	0.905229		1692	TUBA1B	0.20318	7.57337e-05
1693	GPC1	ZFAND6	0.117245	0.0233502		1693	SARDH	-0.252534	7.50408e-07
1694	GPC1	HSD17B2	-0.00226873	0.965121		1694	STIL	0.21666	2.37577e-05
1695	GPC1	TXLNG	0.0186946	0.71858		1695	IL13RA2	0.188471	0.000246792
1696	GPC1	PPEF1	0.104987	0.0424404		1696	COL10A1	0.31728	3.42262e-10
1697	GPC1	LAT2	0.388855	5.98844e-15		1697	AMD1	0.174588	0.000695992
1698	GPC1	HUWE1	0.149022	0.00387138		1698	SERPINA7	-0.176395	0.000610735
1699	GPC1	ZW10	0.127004	0.0139762		1699	RAB9B	0.264198	2.16412e-07
1700	GPC1	ALG9	-0.118256	0.0221756		1700	NRK	0.205421	6.27801e-05
1701	GPC1	MYBPC2	0.142915	0.00562587		1701	RAB9A	0.33754	2.03333e-11
1702	GPC1	NOX4	0.197459	0.000121138		1702	NMI	0.234701	4.47631e-06
1703	GPC1	ACOX3	0.0553416	0.28575		1703	TNFAIP6	0.360926	5.98769e-13
1704	GPC1	MTMR2	0.310263	8.67283e-10		1704	BAZ2B	0.170819	0.00091043
1705	GPC1	PPP1R15A	0.216043	2.5093e-05		1705	SLC36A1	0.257817	4.30457e-07
1706	GPC1	HSD17B14	-0.0681902	0.188223		1706	BATF3	0.211546	3.72067e-05
1707	GPC1	TRIP6	0.180644	0.000446885		1707	EXOSC9	0.190667	0.000208026
1708	GPC1	ACHE	0.163269	0.00153388		1708	COQ8B	0.264118	2.18315e-07
1709	GPC1	FTL	-0.174892	0.000680907		1709	C4BPA	-0.172287	0.000820521
1710	GPC1	SRRT	0.123564	0.0168127		1710	C4BPB	-0.288422	1.34459e-08
1711	GPC1	BAX	0.000529543	0.991856		1711	RAB38	0.226428	9.78724e-06
1712	GPC1	NLK	0.0160716	0.756721		1712	CHPF	0.356924	1.11757e-12
1713	GPC1	PIGS	0.250231	9.52381e-07		1713	FAM124B	0.222691	1.38062e-05
1714	GPC1	ADAMTS2	0.382261	1.84898e-14		1714	SLC12A4	0.212147	3.53144e-05
1715	GPC1	TMPRSS11E	0.113937	0.0275783		1715	PI3	0.292813	7.89209e-09
1716	GPC1	ATXN7L3	0.0206726	0.690266		1716	SNX21	0.210134	4.20332e-05
1717	GPC1	PGS1	0.123517	0.0168549		1717	SLPI	0.385829	1.00782e-14
1718	GPC1	PSMC5	-0.0184122	0.722655		1718	PREX1	0.256795	4.79811e-07
1719	GPC1	UIMC1	0.131312	0.0110228		1719	KCNS1	0.171775	0.000850921
1720	GPC1	CETP	-0.176038	0.000626752		1720	PARD6B	0.188653	0.000243351
1721	GPC1	MMP2	0.414231	6.13215e-17		1721	TOX2	0.181577	0.000416871
1722	GPC1	MT3	-0.0863659	0.0953625		1722	TMEM189-UBE2V1	0.194952	0.000148216
1723	GPC1	LPCAT2	0.0929888	0.072464		1723	RAB22A	0.19185	0.000189581
1724	GPC1	GNAO1	0.06047	0.243377		1724	PTGIS	0.25299	7.15602e-07
1725	GPC1	OGFOD1	0.155582	0.0025517		1725	STAU1	-0.234382	4.61571e-06
1726	GPC1	SH3BP2	0.185767	0.000303815		1726	SNAI1	0.331288	4.96896e-11
1727	GPC1	NOP14	-0.120928	0.0193143		1727	PMEPA1	0.4404	3.55581e-19
1728	GPC1	ADD1	0.129542	0.012162		1728	KCNK15	0.279214	3.99087e-08
1729	GPC1	L2HGDH	-0.0183118	0.724105		1729	NEURL2	-0.240836	2.45927e-06
1730	GPC1	TXNDC16	0.0841887	0.104041		1730	IQSEC2	0.439403	4.36248e-19
1731	GPC1	RTRAF	0.0873279	0.0917165		1731	IL9R	0.228365	8.17056e-06
1732	GPC1	NID2	0.22574	1.04319e-05		1732	STAMBP	0.200618	9.36179e-05
1733	GPC1	GMCL1	0.155134	0.0026268		1733	NAGK	0.26272	2.54209e-07
1734	GPC1	SF3B2	0.138888	0.00714461		1734	SNRNP27	0.232451	5.55356e-06
1735	GPC1	KLHL42	0.240253	2.60507e-06		1735	F13A1	0.236212	3.86819e-06
1736	GPC1	GNAS	0.0871283	0.0924637		1736	TRERF1	0.24835	1.15514e-06
1737	GPC1	DNM1L	0.185228	0.000316562		1737	SIRT5	-0.247362	1.27759e-06
1738	GPC1	PTHLH	0.154636	0.00271256		1738	SLC17A1	-0.25358	6.7285e-07
1739	GPC1	PHACTR3	0.101677	0.0494315		1739	SERPINB6	0.188901	0.00023871
1740	GPC1	ERGIC2	0.0340779	0.511169		1740	AL365205.1	0.181493	0.000419519
1741	GPC1	TFAP2C	0.153062	0.00300058		1741	MOCS1	-0.202257	8.17689e-05
1742	GPC1	AURKA	0.0201679	0.697452		1742	KLHDC3	-0.173447	0.000755385
1743	GPC1	CASS4	-0.0047582	0.926927		1743	TREM1	0.175359	0.000658329
1744	GPC1	PIR	0.0739461	0.153518		1744	CDKN1A	0.384565	1.25072e-14
1745	GPC1	AAMDC	0.00246734	0.96207		1745	SOX4	0.219334	1.871e-05
1746	GPC1	RFX2	0.260334	3.28932e-07		1746	GLO1	-0.182483	0.000389548
1747	GPC1	METTL2A	0.00549489	0.915653		1747	CPNE5	0.170726	0.000916428
1748	GPC1	SULT2B1	0.162413	0.00162519		1748	RUNX2	0.290677	1.02382e-08
1749	GPC1	ALG6	0.0444621	0.391223		1749	LRRFIP1	0.286324	1.72886e-08
1750	GPC1	CNOT3	0.0848997	0.101141		1750	CXCL6	0.274796	6.63293e-08
1751	GPC1	GP6	0.114913	0.0262673		1751	SCGB2A1	0.201864	8.44759e-05
1752	GPC1	PTPN4	0.165293	0.00133656		1752	AHNAK	0.197267	0.000123044
1753	GPC1	DDX18	0.0818405	0.11409		1753	C16orf70	-0.185871	0.000301421
1754	GPC1	KHSRP	-0.00788672	0.879176		1754	ABCC4	0.271171	9.99753e-08
1755	GPC1	GNA11	0.205669	6.1482e-05		1755	EFNB2	0.21744	2.21666e-05
1756	GPC1	ASAP3	0.103954	0.0445284		1756	IRF1	0.18282	0.000379805
1757	GPC1	EDEM2	0.0947583	0.0671715		1757	SEPTIN6	0.203043	7.66017e-05
1758	GPC1	DNMT3B	0.0774085	0.135113		1758	BMP4	-0.24018	2.62378e-06
1759	GPC1	REM1	0.236302	3.83456e-06		1759	HS3ST3B1	-0.362761	4.48425e-13
1760	GPC1	TPX2	0.113599	0.0280442		1760	SLC25A35	0.169675	0.000986666
1761	GPC1	PDRG1	0.0733248	0.157012		1761	TTF1	0.225149	1.10172e-05
1762	GPC1	EPB41L1	0.221614	1.52278e-05		1762	SRMS	0.208474	4.84592e-05
1763	GPC1	SLC15A1	0.0451428	0.384004		1763	OPRL1	0.312951	6.0914e-10
1764	GPC1	DOCK9	0.275365	6.21581e-08		1764	SLC2A4RG	-0.190838	0.00020526
1765	GPC1	ANKRD10	0.180119	0.000464663		1765	FNDC11	0.204612	6.71934e-05
1766	GPC1	TGDS	0.0454062	0.381233		1766	PPDPF	0.444139	1.6416e-19
1767	GPC1	DOCK3	0.0540845	0.296853		1767	PLGLB2	0.200616	9.36353e-05
1768	GPC1	C3orf18	0.134623	0.00914358		1768	PSD4	0.200929	9.12472e-05
1769	GPC1	COQ9	0.169932	0.000969077		1769	TNFSF9	0.25959	3.56261e-07
1770	GPC1	TMEM40	0.0766253	0.13912		1770	RPL23	-0.176019	0.00062765
1771	GPC1	KIF9	0.0464838	0.370023		1771	SH2D3A	0.253639	6.68736e-07
1772	GPC1	ARHGAP28	0.268865	1.29372e-07		1772	TRIP10	0.198712	0.000109418
1773	GPC1	CRLS1	-0.327943	7.94909e-11		1773	EML2	0.298065	4.12323e-09
1774	GPC1	DEFB127	-0.0503506	0.331503		1774	VASP	0.261851	2.7929e-07
1775	GPC1	PPP1R13B	0.193239	0.000169879		1775	SDCBP2	0.311279	7.59161e-10
1776	GPC1	ATRN	0.00540867	0.916971		1776	FOXA2	-0.279043	4.07072e-08
1777	GPC1	SMOX	0.222613	1.39046e-05		1777	CD93	0.263035	2.45649e-07
1778	GPC1	SIGLEC1	0.153831	0.00285652		1778	PSMF1	-0.205877	6.04109e-05
1779	GPC1	FKBP1A	0.136327	0.00829168		1779	NRSN2	0.188541	0.000245465
1780	GPC1	NSFL1C	0.00467973	0.928129		1780	OVOL2	0.248259	1.16595e-06
1781	GPC1	SLC4A11	0.244601	1.6892e-06		1781	DSTN	0.374239	7.04568e-14
1782	GPC1	C20orf194	0.370641	1.26862e-13		1782	LAMP5	0.212933	3.29799e-05
1783	GPC1	ZNF343	-0.0450728	0.384743		1783	BANF2	-0.179754	0.000477394
1784	GPC1	EBF4	0.250667	9.10554e-07		1784	FAM110A	0.22566	1.05099e-05
1785	GPC1	CPXM1	0.282	2.88355e-08		1785	ZNF436	0.276253	5.61525e-08
1786	GPC1	MAVS	-0.0102776	0.842967		1786	MAX	0.250276	9.47961e-07
1787	GPC1	LZTS3	0.0210901	0.684344		1787	AGO3	0.249701	1.00575e-06
1788	GPC1	F11	-0.12166	0.0185893		1788	HECTD3	0.31262	6.36334e-10
1789	GPC1	XRN2	0.0493758	0.340962		1789	KLC1	0.299472	3.45726e-09
1790	GPC1	KIZ	-0.147851	0.00416349		1790	XRCC3	0.179579	0.000483608
1791	GPC1	DYNLL1	0.117988	0.022482		1791	F10	-0.273145	8.00171e-08
1792	GPC1	TESC	0.225574	1.05935e-05		1792	PDCD2L	-0.189068	0.000235632
1793	GPC1	SNX5	-0.0252222	0.626812		1793	THRA	0.284098	2.25212e-08
1794	GPC1	RPL6	-0.166719	0.00121182		1794	FRMD8	0.314923	4.68993e-10
1795	GPC1	SIRPG	0.00664715	0.898053		1795	RRAS	0.332914	3.94618e-11
1796	GPC1	MAPKAPK5	0.0617523	0.233507		1796	PRRG2	0.270138	1.12242e-07
1797	GPC1	P2RX7	0.0389291	0.452882		1797	FLRT1	0.191808	0.000190211
1798	GPC1	ESF1	-0.0463877	0.371015		1798	GLIS2	0.372473	9.41149e-14
1799	GPC1	RBBP9	-0.13054	0.0115079		1799	AHDC1	0.420643	1.80893e-17
1800	GPC1	ANAPC5	-0.010744	0.83594		1800	ELK1	0.204985	6.51218e-05
1801	GPC1	SLC23A2	-0.127174	0.0138472		1801	RHOJ	0.262696	2.54862e-07
1802	GPC1	SLC8B1	0.354677	1.58053e-12		1802	ZBTB1	0.25838	4.05441e-07
1803	GPC1	TMEM230	-0.189231	0.000232668		1803	PLEKHG3	0.211709	3.66824e-05
1804	GPC1	DZANK1	0.279339	3.93316e-08		1804	EVI2A	0.243185	1.94682e-06
1805	GPC1	KDM2B	-0.0233497	0.65263		1805	FAM78A	0.216381	2.43529e-05
1806	GPC1	CFAP61	0.0833236	0.107659		1806	SLC10A3	0.208539	4.8191e-05
1807	GPC1	LHX5	0.251092	8.71438e-07		1807	ARMCX1	0.263586	2.31359e-07
1808	GPC1	TASP1	0.0951792	0.0659604		1808	TMEM35A	0.259252	3.69362e-07
1809	GPC1	OAS1	0.0619858	0.231741		1809	ZNF484	0.20502	6.49338e-05
1810	GPC1	GCN1	0.0832399	0.108014		1810	OMD	0.268199	1.39323e-07
1811	GPC1	RPLP0	-0.152058	0.00319856		1811	FGD3	0.225751	1.04211e-05
1812	GPC1	PXN	0.214931	2.76824e-05		1812	HIVEP3	0.359635	7.33057e-13
1813	GPC1	SIRT4	-0.171031	0.000896927		1813	EDN2	0.218471	2.02158e-05
1814	GPC1	RPH3A	0.257174	4.60887e-07		1814	TRAF2	0.186641	0.000284173
1815	GPC1	KIF16B	0.0980972	0.0580484		1815	MASP1	-0.183834	0.000351852
1816	GPC1	TRMT6	-0.0338112	0.514482		1816	PLAAT1	0.175404	0.000656207
1817	GPC1	CHGB	-0.112576	0.0294993		1817	RAP1B	0.248526	1.13451e-06
1818	GPC1	PEBP1	-0.310013	8.96161e-10		1818	DYRK2	0.35099	2.77459e-12
1819	GPC1	TBX5	0.205891	6.03404e-05		1819	IDUA	0.25113	8.68009e-07
1820	GPC1	BRAP	0.0830989	0.108614		1820	EMC1	0.192552	0.000179363
1821	GPC1	ERP29	0.0505147	0.329927		1821	PLA2G5	0.207314	5.34911e-05
1822	GPC1	NOS1	0.0513224	0.322243		1822	UBR4	0.213797	3.058e-05
1823	GPC1	FUS	0.190533	0.000210212		1823	ADGRE2	0.175696	0.000642489
1824	GPC1	IGBP1	0.053414	0.30289		1824	SIN3B	0.269698	1.17903e-07
1825	GPC1	FXYD5	0.30604	1.50015e-09		1825	SLC35E1	0.25127	8.5553e-07
1826	GPC1	ZNF302	-0.00428393	0.934193		1826	EPS15L1	0.241534	2.29484e-06
1827	GPC1	GRAMD1A	0.185632	0.000306952		1827	KLF2	0.274449	6.90093e-08
1828	GPC1	FXYD3	0.129454	0.0122214		1828	F2RL3	0.25819	4.13699e-07
1829	GPC1	HEPH	0.375261	5.95388e-14		1829	SYNGR3	0.206891	5.54483e-05
1830	GPC1	CDIP1	-0.0528912	0.307653		1830	PKMYT1	0.238877	2.98259e-06
1831	GPC1	CMTM1	0.23347	5.03785e-06		1831	FBXL16	0.242553	2.07373e-06
1832	GPC1	KCNH4	0.172793	0.000791527		1832	CHTF18	0.196194	0.000134165
1833	GPC1	GANAB	0.0553738	0.28547		1833	GNG13	0.186034	0.000297679
1834	GPC1	GMIP	0.275541	6.09205e-08		1834	MACF1	0.251278	8.54827e-07
1835	GPC1	RBM41	0.0728735	0.159587		1835	SMARCA4	0.176719	0.000596504
1836	GPC1	BIRC5	0.0987374	0.056422		1836	TICAM1	0.35637	1.21759e-12
1837	GPC1	LAG3	-0.0520719	0.315218		1837	TUBA4A	0.293626	7.14325e-09
1838	GPC1	MLF2	0.112645	0.0293991		1838	AKAP9	0.197346	0.000122256
1839	GPC1	OTUB2	0.115707	0.0252413		1839	HIP1	0.318004	3.10542e-10
1840	GPC1	DDX24	0.0180514	0.727873		1840	POR	-0.23823	3.17784e-06
1841	GPC1	ZBTB25	0.28048	3.44454e-08		1841	LRFN1	0.233193	5.17323e-06
1842	GPC1	NECAP1	0.127726	0.0134374		1842	ZFP36	0.193933	0.000160764
1843	GPC1	ARHGAP4	0.321378	1.96624e-10		1843	RASL11B	0.230344	6.78308e-06
1844	GPC1	ANKRD24	-0.0235705	0.649563		1844	ADM2	0.253653	6.67723e-07
1845	GPC1	DHX32	0.0383927	0.459137		1845	ASPHD2	0.24683	1.34855e-06
1846	GPC1	RCOR1	0.124329	0.0161415		1846	YWHAH	0.254754	5.95002e-07
1847	GPC1	GPATCH2L	0.197376	0.000121956		1847	GNAZ	0.293058	7.65927e-09
1848	GPC1	LTBP4	0.419927	2.07564e-17		1848	A4GALT	0.398507	1.09775e-15
1849	GPC1	BLVRB	0.058489	0.259192		1849	TPST2	0.197832	0.000117536
1850	GPC1	SLC9A1	0.410244	1.29299e-16		1850	BAIAP2L2	0.190598	0.000209152
1851	GPC1	SPTLC1	0.112584	0.0294879		1851	MPST	-0.241813	2.23224e-06
1852	GPC1	PAPOLA	0.082796	0.109913		1852	GALR3	-0.327897	8.0009e-11
1853	GPC1	CCNK	0.0750802	0.147291		1853	TST	-0.228026	8.43426e-06
1854	GPC1	PCBP4	0.0127866	0.805323		1854	APOL2	0.193136	0.000171263
1855	GPC1	RGS1	0.262257	2.67279e-07		1855	LIF	0.333374	3.69634e-11
1856	GPC1	YPEL3	0.0315282	0.543296		1856	C22orf23	0.264185	2.1672e-07
1857	GPC1	MRPS33	-0.116893	0.0237719		1857	APOBEC3F	0.187041	0.000275573
1858	GPC1	NDUFB2	0.0814563	0.115804		1858	RIBC2	0.211382	3.77379e-05
1859	GPC1	NUDC	0.148566	0.00398304		1859	KRT17	0.2184	2.03449e-05
1860	GPC1	MAEA	0.12974	0.0120293		1860	RNF112	0.259725	3.51126e-07
1861	GPC1	ICAM1	0.17594	0.000631254		1861	SPECC1	0.344311	7.54966e-12
1862	GPC1	STRN4	0.109894	0.0336225		1862	PODXL	0.316521	3.78937e-10
1863	GPC1	IRAK3	0.239801	2.72377e-06		1863	IFT22	0.245854	1.4887e-06
1864	GPC1	LYZ	-0.0880323	0.0891184		1864	FLNC	0.288906	1.26837e-08
1865	GPC1	SI	-0.012458	0.81023		1865	LRRC4	0.19742	0.000121525
1866	GPC1	MUL1	0.214442	2.8899e-05		1866	CALU	0.209276	4.52459e-05
1867	GPC1	TFAP4	0.0973244	0.0600632		1867	CCDC136	0.309873	9.12587e-10
1868	GPC1	PDCD7	0.0797338	0.123739		1868	IRF5	0.214594	2.85142e-05
1869	GPC1	SPG21	0.0972966	0.0601366		1869	LRRC17	0.300874	2.89785e-09
1870	GPC1	FETUB	-0.109928	0.0335677		1870	FEZF1	0.214911	2.77302e-05
1871	GPC1	DNAJB11	0.00763159	0.883056		1871	MTX2	0.237598	3.38028e-06
1872	GPC1	P3H2	0.353344	1.93878e-12		1872	PDE11A	-0.208571	4.80611e-05
1873	GPC1	THPO	-0.344185	7.69171e-12		1873	CHN1	0.31832	2.97573e-10
1874	GPC1	CHRD	-0.182677	0.000383903		1874	GAD1	0.202588	7.95559e-05
1875	GPC1	FLT3LG	0.0749683	0.147896		1875	TWSG1	0.314087	5.24141e-10
1876	GPC1	RAB11FIP3	0.182803	0.000380295		1876	ARHGAP22	0.414981	5.32342e-17
1877	GPC1	GNPTG	0.213125	3.24307e-05		1877	TMOD2	0.241702	2.25684e-06
1878	GPC1	ZNF268	-0.0892298	0.0848371		1878	TTBK2	0.200249	9.64975e-05
1879	GPC1	GOLGA3	0.134141	0.00939787		1879	ELL3	0.199297	0.000104325
1880	GPC1	PABPC4	-0.0015383	0.976346		1880	CCDC32	0.247038	1.32035e-06
1881	GPC1	CD209	0.130166	0.0117491		1881	INO80	0.207311	5.35084e-05
1882	GPC1	CERS4	-0.277379	4.93395e-08		1882	MINDY2	0.184412	0.00033679
1883	GPC1	MCOLN1	0.107591	0.0375456		1883	CHAC1	0.19502	0.000147413
1884	GPC1	USP48	0.269163	1.25149e-07		1884	ARPP19	0.183148	0.00037056
1885	GPC1	EFNB1	0.424484	8.59751e-18		1885	VPS13C	0.2114	3.76781e-05
1886	GPC1	PDPR	0.151169	0.00338365		1886	ISLR	0.428877	3.62932e-18
1887	GPC1	AARS1	0.0587596	0.256991		1887	LOXL1	0.434559	1.16728e-18
1888	GPC1	GLG1	0.247728	1.23087e-06		1888	MBD4	0.198987	0.000106999
1889	GPC1	KIF4A	0.131324	0.0110159		1889	PALLD	0.249889	9.86498e-07
1890	GPC1	TNRC6A	0.198396	0.000112272		1890	SOX15	0.235134	4.29329e-06
1891	GPC1	PLEKHG2	0.167354	0.00115985		1891	PLD2	0.262687	2.55112e-07
1892	GPC1	DLL3	-0.0207567	0.689072		1892	PHF20L1	0.182603	0.000386042
1893	GPC1	NAT14	0.0383146	0.460053		1893	SLC44A2	0.356663	1.16364e-12
1894	GPC1	PITPNM2	0.171162	0.00088863		1894	CDKN2D	0.282043	2.86894e-08
1895	GPC1	EXOC1	0.245111	1.60473e-06		1895	KLK14	0.208378	4.88589e-05
1896	GPC1	RBM27	0.0977082	0.0590555		1896	SIGLEC9	0.205215	6.38773e-05
1897	GPC1	POU4F3	0.166512	0.00122926		1897	RIPK3	0.197753	0.000118287
1898	GPC1	OSBPL8	0.183396	0.000363699		1898	ADCY4	0.224681	1.1504e-05
1899	GPC1	DTX2	0.131337	0.0110077		1899	BCL2L2	0.19462	0.000152207
1900	GPC1	NLRC4	0.199641	0.000101427		1900	EGLN3	0.211937	3.59646e-05
1901	GPC1	PUS7	0.00806256	0.876504		1901	TEP1	0.278968	4.10615e-08
1902	GPC1	LAMB4	0.0139854	0.787489		1902	EPB41L4A	0.311818	7.07264e-10
1903	GPC1	NRCAM	0.140888	0.00634965		1903	CDO1	-0.322105	1.78061e-10
1904	GPC1	LAMB1	0.293459	7.29141e-09		1904	RHBDF2	0.300658	2.97789e-09
1905	GPC1	SLC26A4	0.174784	0.000686223		1905	AANAT	0.220528	1.68027e-05
1906	GPC1	SLC26A3	-0.157237	0.00229117		1906	ARHGEF6	0.213421	3.16028e-05
1907	GPC1	DLD	0.139207	0.00701241		1907	MAP7D3	0.247786	1.22362e-06
1908	GPC1	WDR7	0.144268	0.00518516		1908	PGAP6	0.337734	1.97716e-11
1909	GPC1	TXNL1	-0.00595819	0.908571		1909	PLPPR3	0.225974	1.02083e-05
1910	GPC1	IL5RA	0.0888167	0.0862949		1910	CBFA2T3	0.237841	3.30119e-06
1911	GPC1	ABCC6	-0.19262	0.000178406		1911	KCNA5	0.173225	0.000767455
1912	GPC1	CMTM6	0.0538334	0.299104		1912	NXNL2	0.265808	1.81422e-07
1913	GPC1	ITGA6	-0.0639238	0.217445		1913	STARD8	0.26526	1.92684e-07
1914	GPC1	RAPGEF4	-0.0144917	0.77999		1914	FAM155B	0.187664	0.000262665
1915	GPC1	MAP3K20	0.358263	9.07897e-13		1915	GDPD2	0.186509	0.000287056
1916	GPC1	SMPX	-0.115387	0.0256505		1916	GNL3L	0.243447	1.89664e-06
1917	GPC1	FH	-0.0839252	0.105133		1917	DOCK6	0.253756	6.60586e-07
1918	GPC1	SEL1L3	0.410935	1.13687e-16		1918	CNN1	0.243205	1.94296e-06
1919	GPC1	TF	-0.287715	1.46381e-08		1919	APOE	-0.179109	0.000500668
1920	GPC1	CDV3	0.177022	0.000583478		1920	APOC1	-0.216676	2.3724e-05
1921	GPC1	MYO15A	0.0364917	0.48169		1921	ATP8B3	0.343006	9.15619e-12
1922	GPC1	ALKBH5	-0.0776618	0.133836		1922	BST2	0.187445	0.000267145
1923	GPC1	APOH	-0.299	3.66792e-09		1923	SLC27A1	0.455274	1.55111e-20
1924	GPC1	NLRP1	0.151326	0.0033503		1924	COLGALT1	0.352874	2.08317e-12
1925	GPC1	PITPNM3	0.244446	1.71577e-06		1925	DDA1	0.197321	0.000122505
1926	GPC1	SPAG7	0.0457057	0.378097		1926	RSPH3	0.264993	1.98398e-07
1927	GPC1	ORC6	0.139267	0.00698769		1927	ACTN4	0.171954	0.000840187
1928	GPC1	ZFHX4	-0.00332647	0.948878		1928	ARPC1B	0.292293	8.40976e-09
1929	GPC1	SLC17A6	0.0614033	0.236165		1929	ZSWIM6	0.298784	3.7689e-09
1930	GPC1	CPA1	-0.0192198	0.711023		1930	FCHO1	0.258187	4.13867e-07
1931	GPC1	ZC3HC1	-0.00821645	0.874166		1931	MAP1S	0.324185	1.33861e-10
1932	GPC1	ESR1	-0.0474024	0.36063		1932	PXDN	0.294404	6.49204e-09
1933	GPC1	RGS17	0.159178	0.00201673		1933	PGPEP1	-0.18926	0.000232154
1934	GPC1	ANGPT2	-0.0562425	0.277968		1934	TRPM4	0.269181	1.24908e-07
1935	GPC1	TMEM101	-0.124378	0.0160992		1935	OLFM1	0.372783	8.94662e-14
1936	GPC1	CD200	0.256323	5.04362e-07		1936	CAMSAP1	0.259439	3.62056e-07
1937	GPC1	CCDC80	0.399102	9.87017e-16		1937	TNNT3	0.248988	1.08215e-06
1938	GPC1	CMA1	-0.0925788	0.0737377		1938	COL5A1	0.425779	6.67599e-18
1939	GPC1	PSME1	-0.0227008	0.661676		1939	CYP2E1	-0.382371	1.81514e-14
1940	GPC1	PPP2R3C	0.035504	0.49364		1940	CEP85	0.201804	8.48952e-05
1941	GPC1	HAUS4	-0.0885996	0.087069		1941	RBBP8NL	0.16996	0.00096715
1942	GPC1	JPH4	0.169851	0.000974628		1942	LAMA5	0.363438	4.02895e-13
1943	GPC1	MYH7	-0.0509512	0.32576		1943	FIBCD1	0.316158	3.97789e-10
1944	GPC1	CEBPE	0.191817	0.000190068		1944	YIPF2	0.176523	0.000605067
1945	GPC1	SLC7A8	0.318112	3.06029e-10		1945	ATG4D	0.321706	1.88032e-10
1946	GPC1	OSGEP	0.163405	0.00151989		1946	MAP3K10	0.206019	5.96947e-05
1947	GPC1	SLC22A17	0.218297	2.05347e-05		1947	ARHGEF16	0.415984	4.40316e-17
1948	GPC1	RNF31	0.127387	0.0136881		1948	SESN2	0.20874	4.73708e-05
1949	GPC1	SCFD1	0.131164	0.0111146		1949	THEMIS2	0.224994	1.11765e-05
1950	GPC1	G2E3	0.212773	3.34423e-05		1950	HIP1R	0.196568	0.000130185
1951	GPC1	HECTD1	0.00770445	0.881948		1951	DNMT1	0.224381	1.18255e-05
1952	GPC1	HNRNPC	0.12148	0.0187651		1952	ZNF426	0.187013	0.000276171
1953	GPC1	RPGRIP1	-0.101768	0.0492264		1953	SLC6A8	0.180535	0.00045053
1954	GPC1	SUPT16H	0.0941439	0.0689721		1954	PLXNA3	0.213209	3.21944e-05
1955	GPC1	TOX4	0.0284461	0.583424		1955	DUSP9	-0.214535	2.86634e-05
1956	GPC1	GEMIN2	0.125507	0.0151542		1956	CASZ1	0.216699	2.36766e-05
1957	GPC1	TGM1	0.145279	0.00487606		1957	HSD17B3	-0.175829	0.000636324
1958	GPC1	TINF2	0.0926095	0.0736417		1958	SLC35D2	-0.312134	6.7844e-10
1959	GPC1	DAZL	0.109896	0.0336192		1959	UBA1	0.298292	4.0077e-09
1960	GPC1	TBL1Y	0.0975293	0.0595233		1960	RGN	-0.290327	1.06823e-08
1961	GPC1	SEMA6A	0.27565	6.01715e-08		1961	ULBP2	0.188978	0.000237301
1962	GPC1	TRPM7	0.0302166	0.560205		1962	ULBP3	0.202207	8.21102e-05
1963	GPC1	TYRO3	0.298886	3.72081e-09		1963	EPS8L1	0.274207	7.09328e-08
1964	GPC1	WDR76	0.172293	0.000820163		1964	TTLL9	0.234874	4.40219e-06
1965	GPC1	CAPN3	-0.020564	0.691811		1965	C1QL1	0.257759	4.33117e-07
1966	GPC1	SNAP23	0.07184	0.165606		1966	ATP6V1E1	0.198078	0.000115207
1967	GPC1	TBX15	0.0570684	0.27096		1967	AC010531.1	-0.257202	4.59537e-07
1968	GPC1	PHGDH	0.0161806	0.755124		1968	GINS2	0.19432	0.000155888
1969	GPC1	COL9A3	-0.0198834	0.701514		1969	SH3BGRL	0.291836	8.89216e-09
1970	GPC1	EZR	0.318777	2.79787e-10		1970	F12	-0.226741	9.50746e-06
1971	GPC1	MYL6	0.161324	0.00174843		1971	PRR7	0.171136	0.000890285
1972	GPC1	AGO1	0.0473155	0.361513		1972	NFATC1	0.339628	1.50191e-11
1973	GPC1	TEKT2	0.115654	0.0253079		1973	CAP1	0.276012	5.77274e-08
1974	GPC1	CLSPN	0.208793	4.7158e-05		1974	PPT1	0.238663	3.04606e-06
1975	GPC1	RFFL	-0.0507702	0.327484		1975	RLIM	0.182308	0.000394688
1976	GPC1	UNC13D	0.268417	1.35978e-07		1976	TRAF3	0.268082	1.41141e-07
1977	GPC1	MFSD11	0.0840342	0.10468		1977	RFTN1	0.325019	1.19315e-10
1978	GPC1	DPYSL2	0.297503	4.42259e-09		1978	SLC6A6	0.341753	1.1008e-11
1979	GPC1	TGFB2	0.206085	5.93588e-05		1979	LRRC4B	0.216549	2.39923e-05
1980	GPC1	GPATCH2	0.153523	0.00291358		1980	PDLIM4	0.253683	6.65635e-07
1981	GPC1	NUP50	0.1481	0.00409994		1981	KIF3A	0.281147	3.18622e-08
1982	GPC1	CDC45	0.159054	0.00203324		1982	GFPT2	0.438296	5.4701e-19
1983	GPC1	COMT	-0.0261459	0.614239		1983	PSMC3IP	0.209802	4.32487e-05
1984	GPC1	ADA2	0.0882072	0.0884825		1984	G6PC	-0.221742	1.50515e-05
1985	GPC1	VNN3	-0.0675444	0.192451		1985	ACAP3	0.226303	9.90173e-06
1986	GPC1	ECHDC1	-0.0056381	0.913463		1986	C1orf159	0.251655	8.22121e-07
1987	GPC1	LRRFIP2	0.0835417	0.106737		1987	TMEM204	0.258717	3.91119e-07
1988	GPC1	SEC22C	0.261358	2.94577e-07		1988	KREMEN2	0.203239	7.53619e-05
1989	GPC1	XYLB	-0.241927	2.207e-06		1989	TRAF7	0.204651	6.69745e-05
1990	GPC1	HDAC6	-0.0734644	0.156221		1990	NPHP4	0.339925	1.43824e-11
1991	GPC1	OR1I1	0.0186527	0.719184		1991	MAP1B	0.327818	8.08974e-11
1992	GPC1	GABRP	0.13691	0.00801727		1992	WDR44	0.211142	3.85295e-05
1993	GPC1	KRT31	0.0554444	0.284854		1993	RARA	0.179123	0.000500147
1994	GPC1	CDC6	0.146278	0.00458714		1994	PPP1R1B	0.208047	5.0261e-05
1995	GPC1	UPRT	0.0445248	0.390554		1995	FMO5	-0.29195	8.76935e-09
1996	GPC1	CDC23	-0.0202883	0.695736		1996	PIAS3	0.246227	1.43359e-06
1997	GPC1	AAAS	-0.00933678	0.857181		1997	PDHA1	0.229201	7.55432e-06
1998	GPC1	CBX5	0.281153	3.18396e-08		1998	RAI2	0.402602	5.2547e-16
1999	GPC1	FMO2	0.155405	0.00258119		1999	CHSY1	0.329993	5.96489e-11
[truncated: 17,576 more rows]
